# Supplementary material
Source: PubMed Central journal article supplement (PMC4572069)

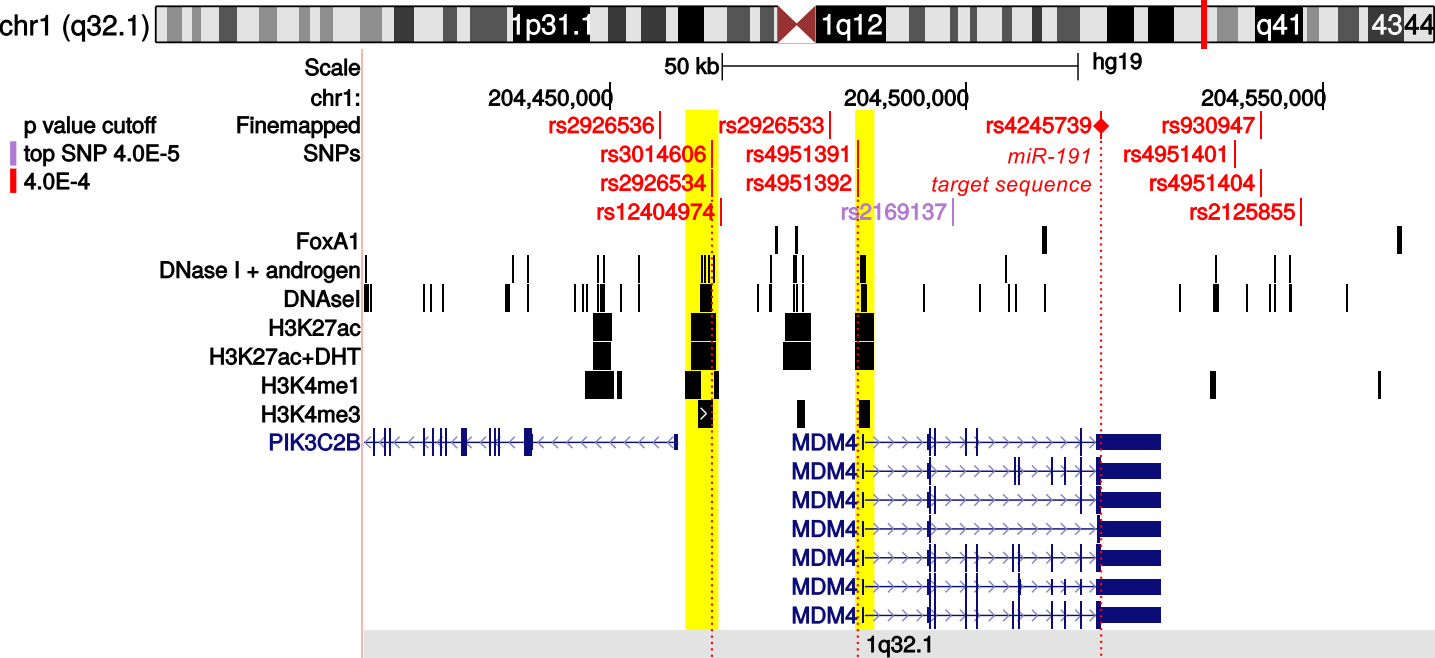

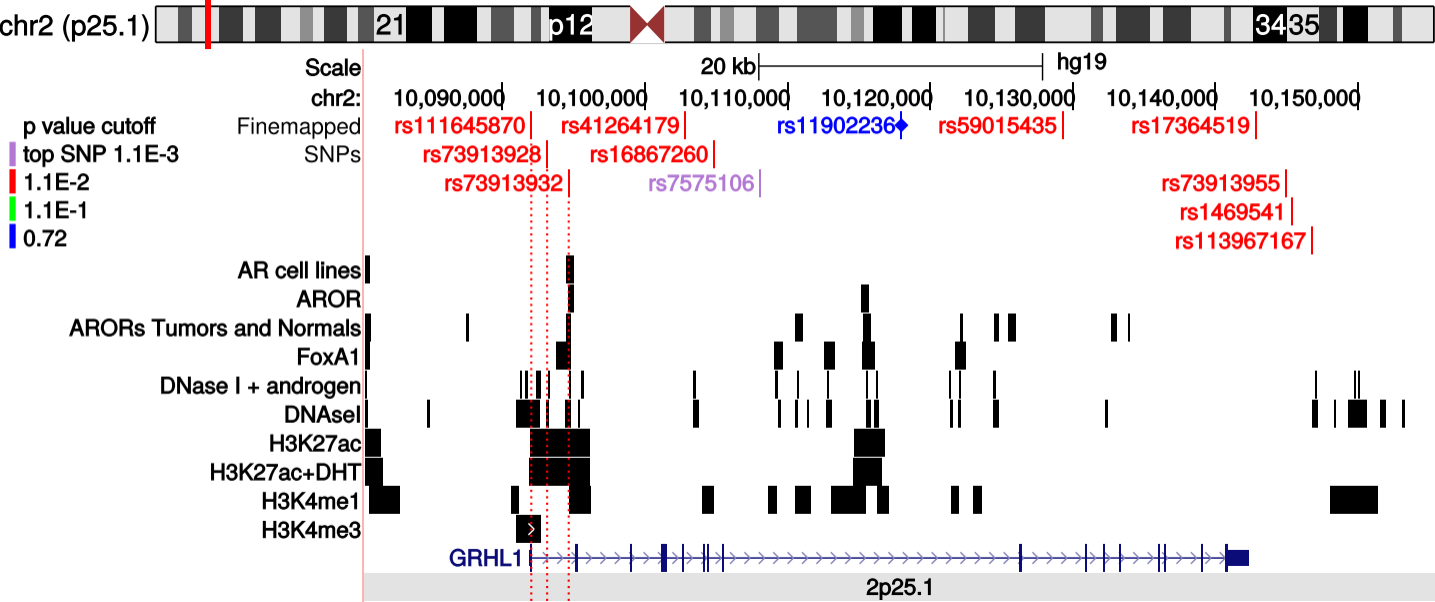

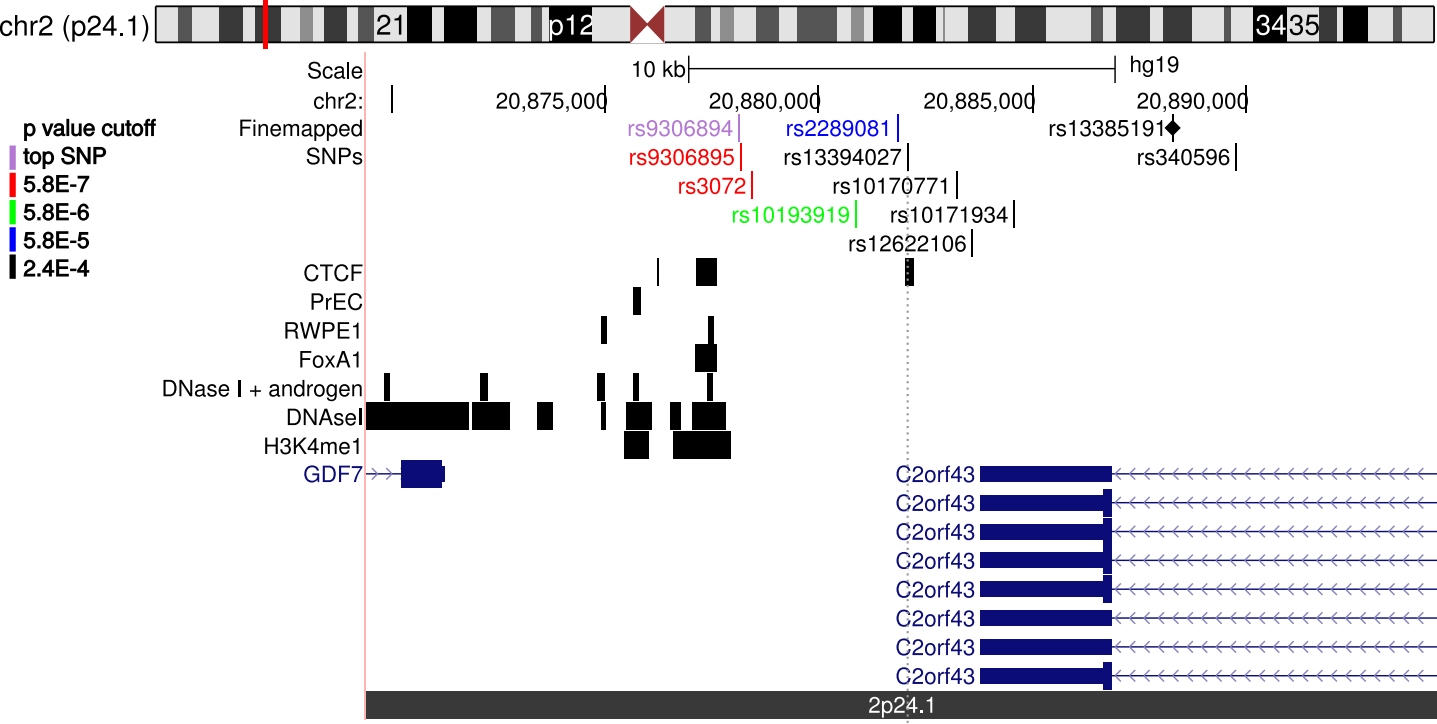

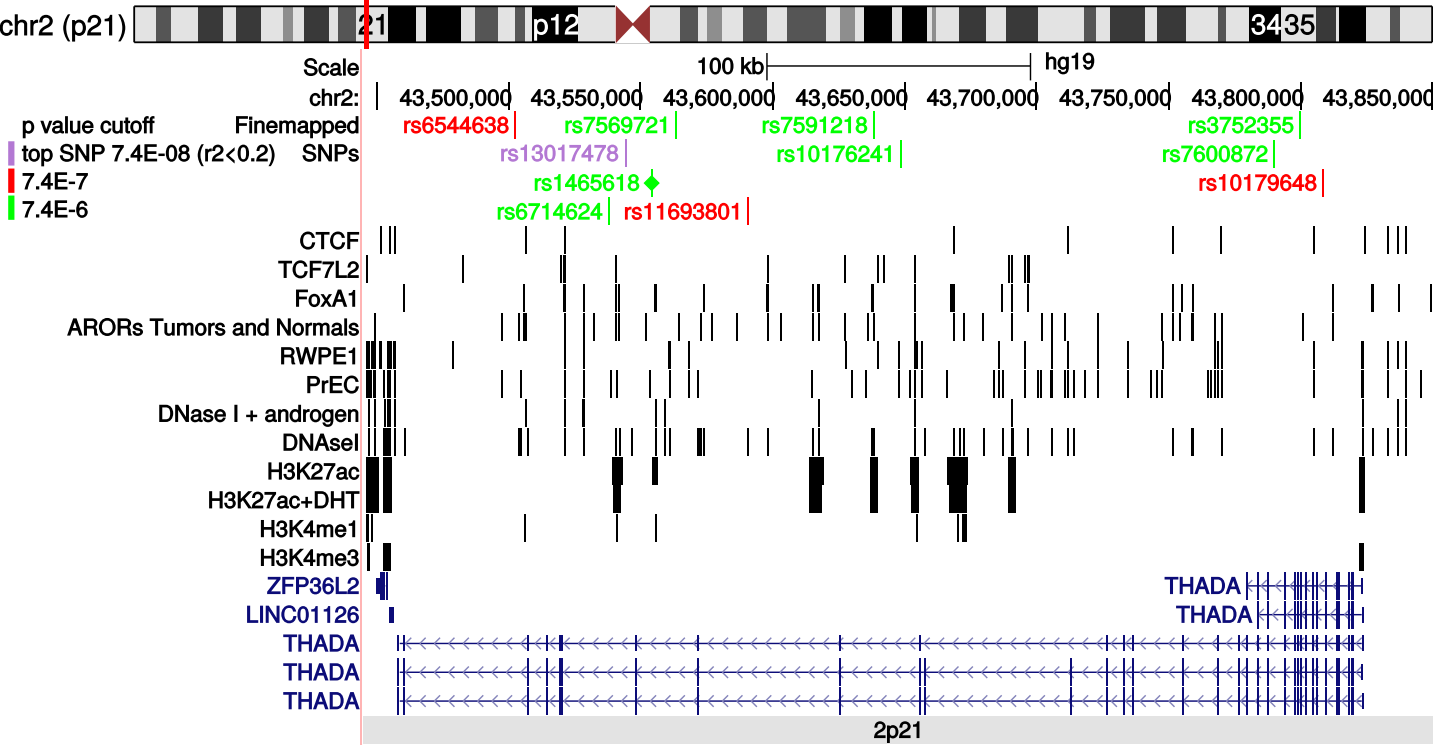

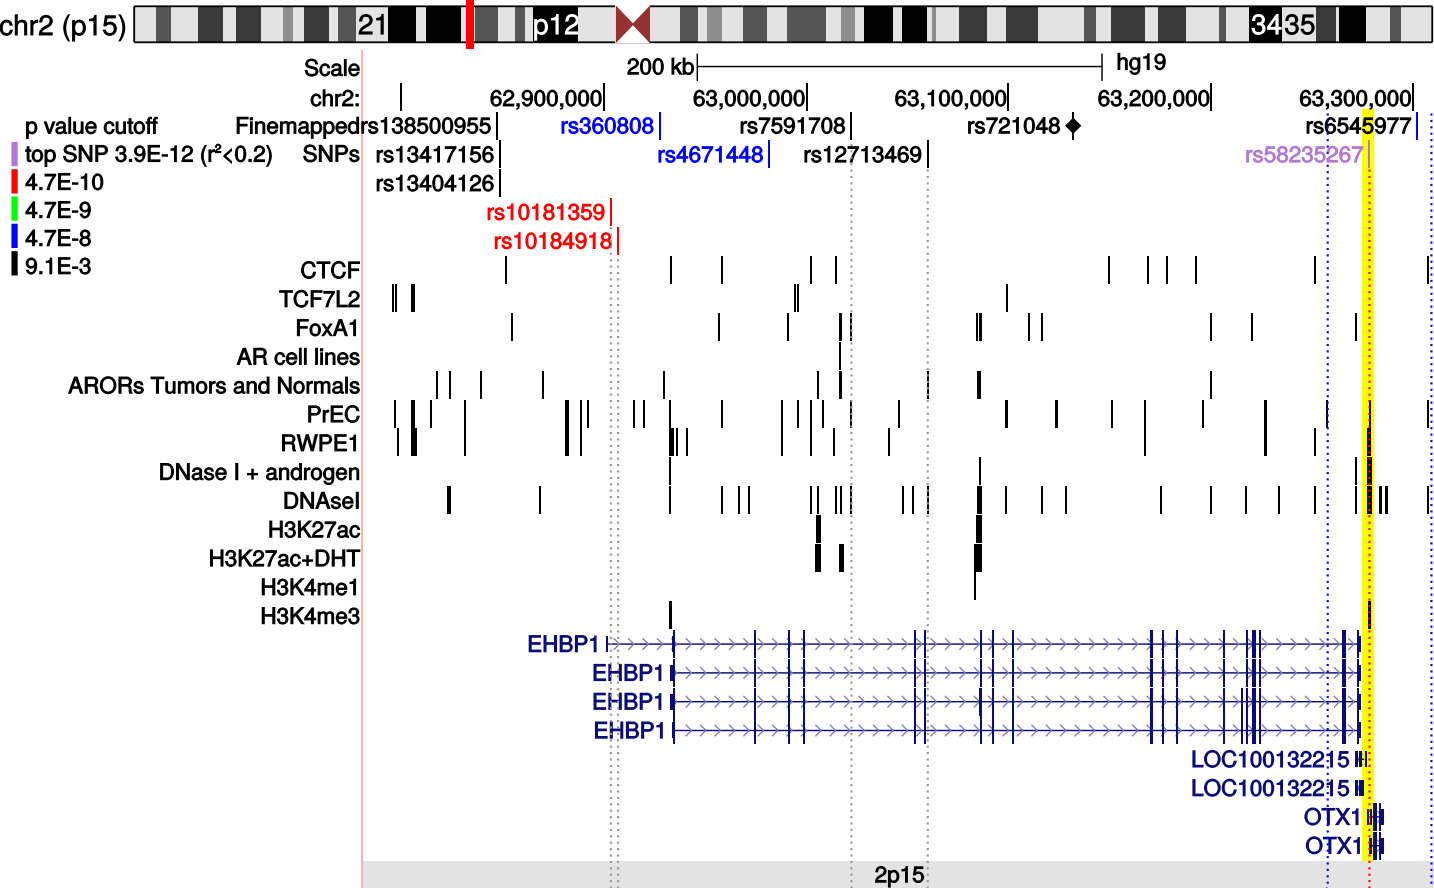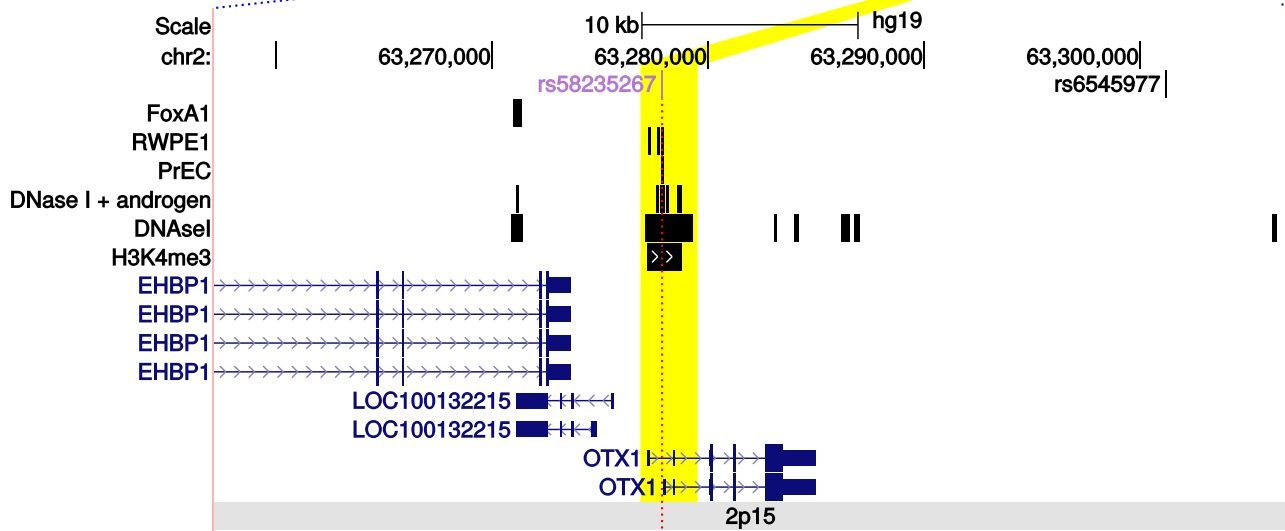

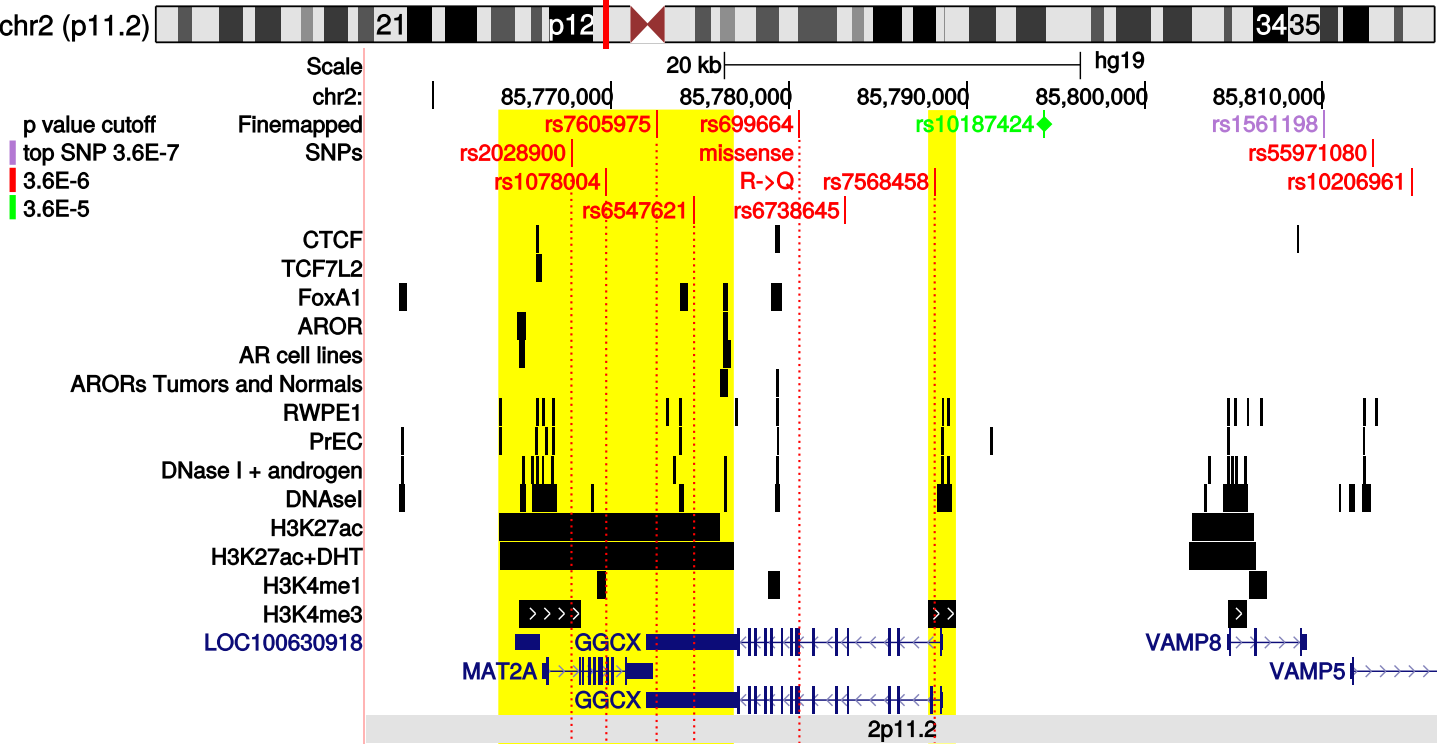



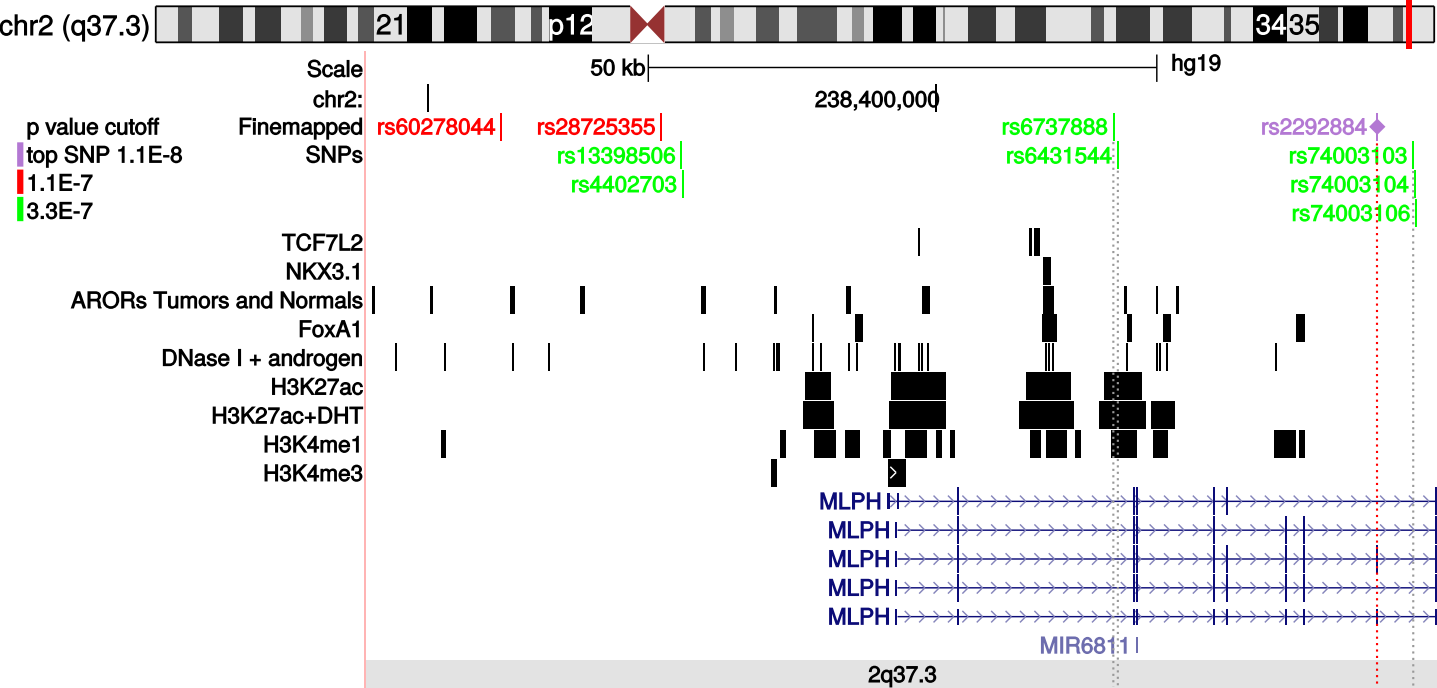



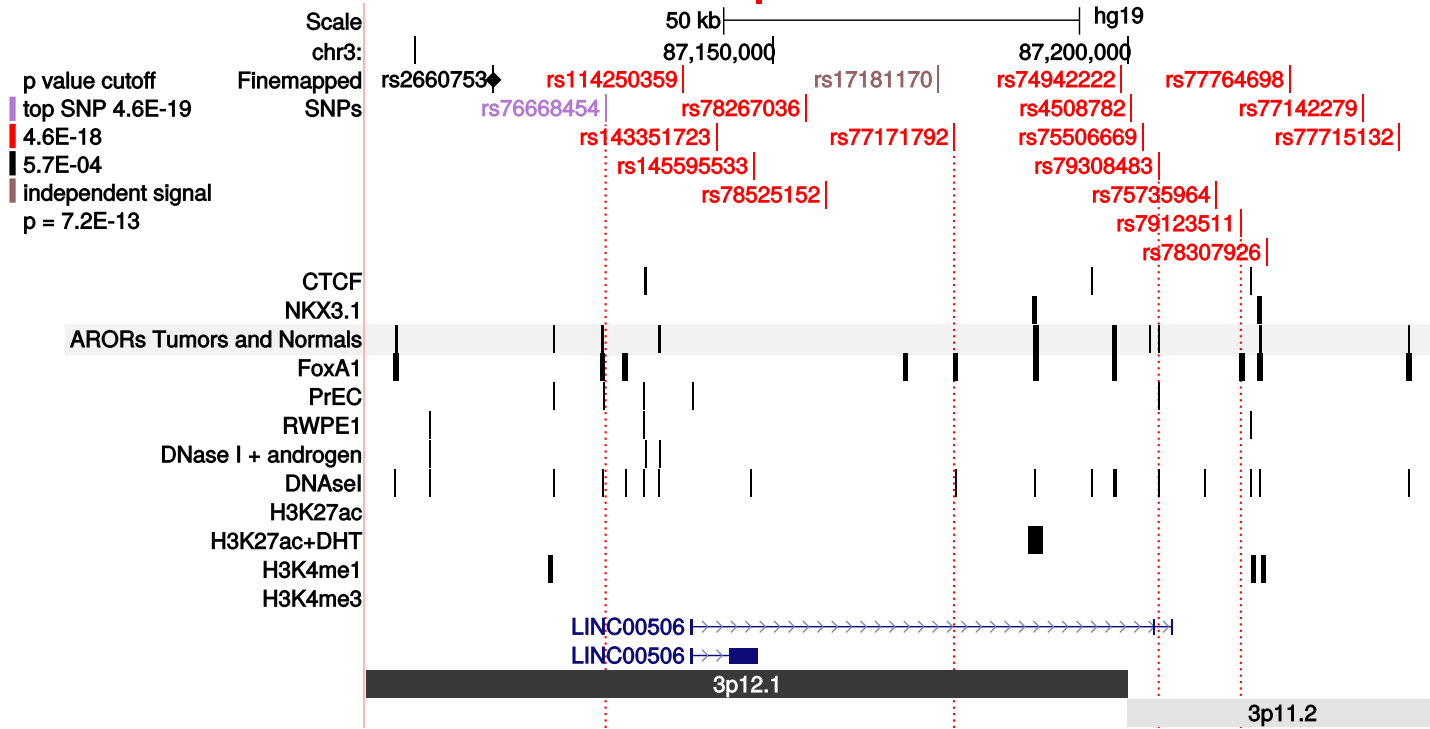

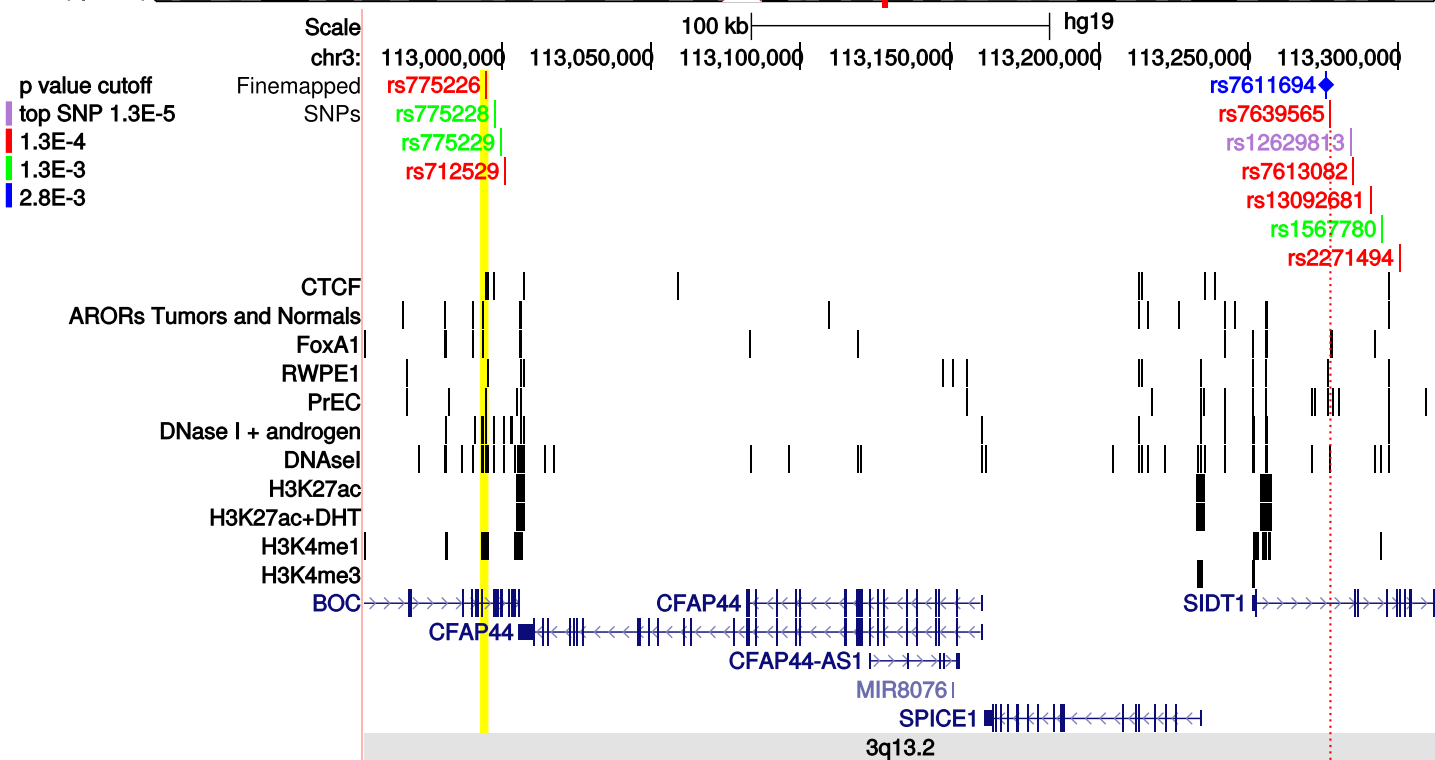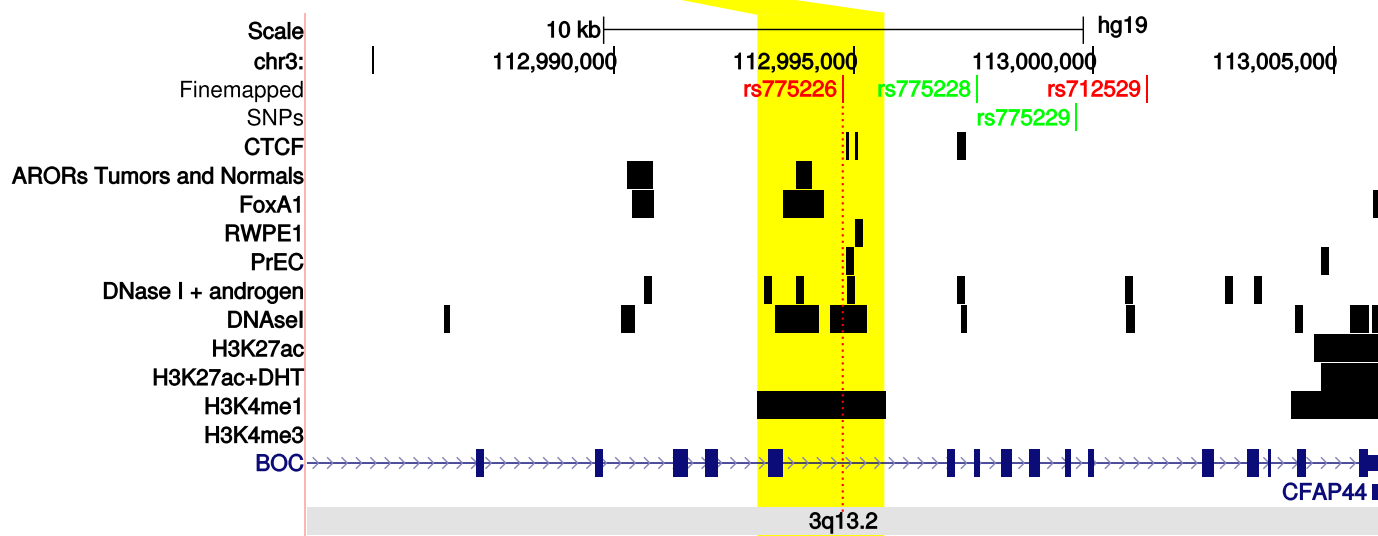

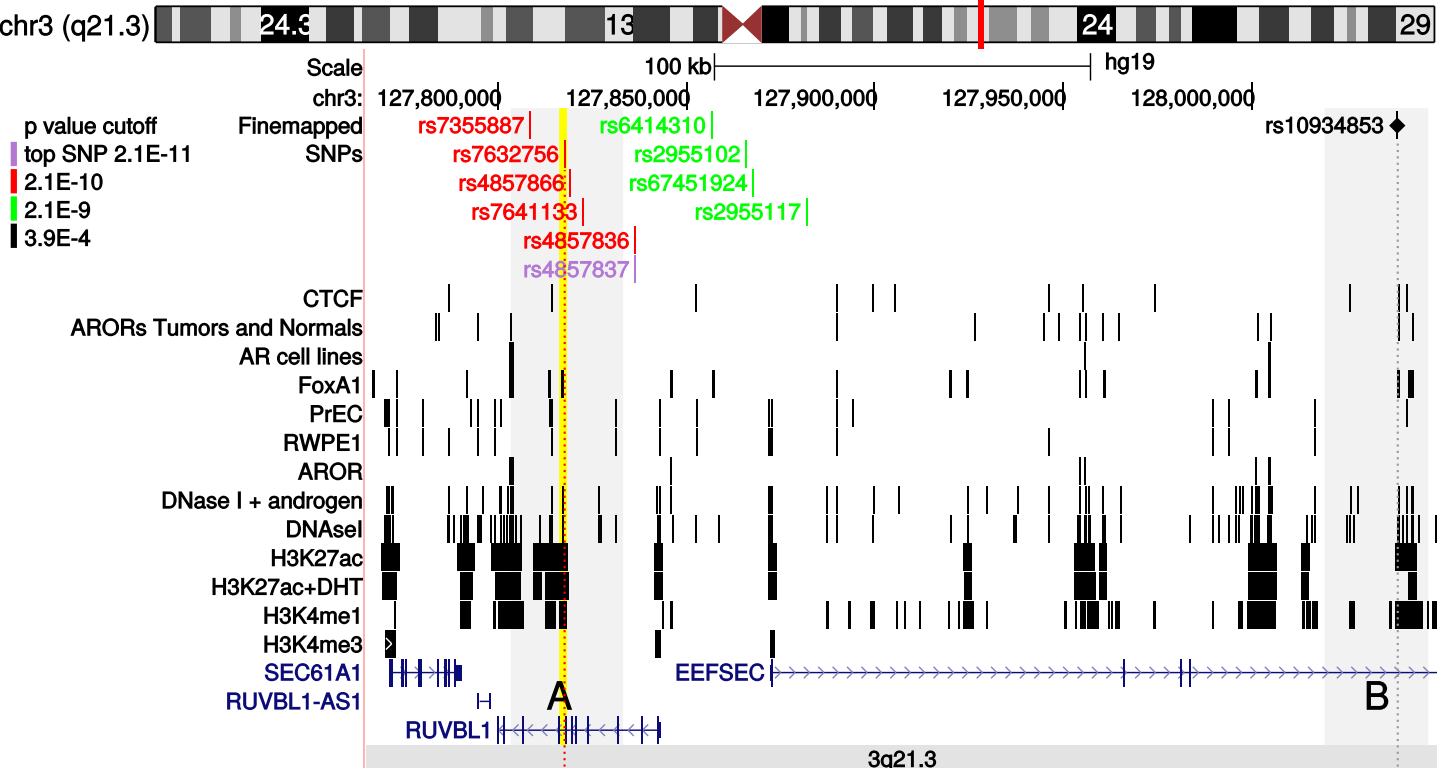

A

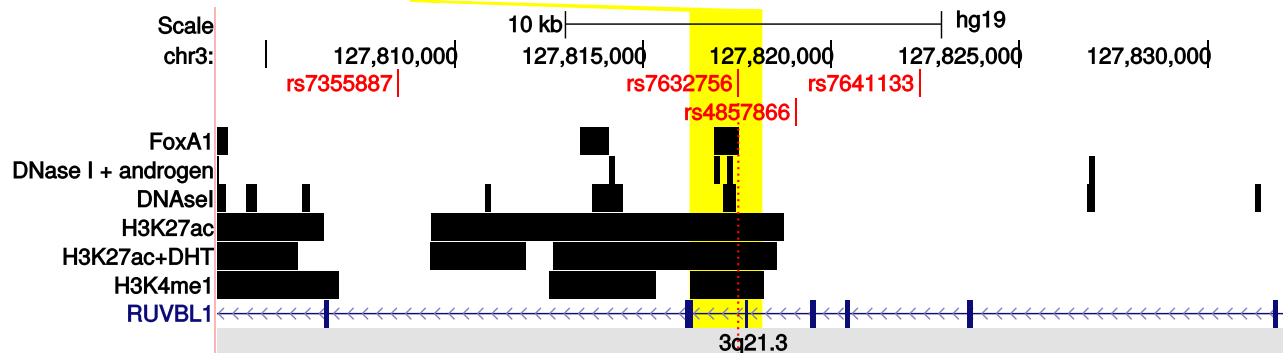

B

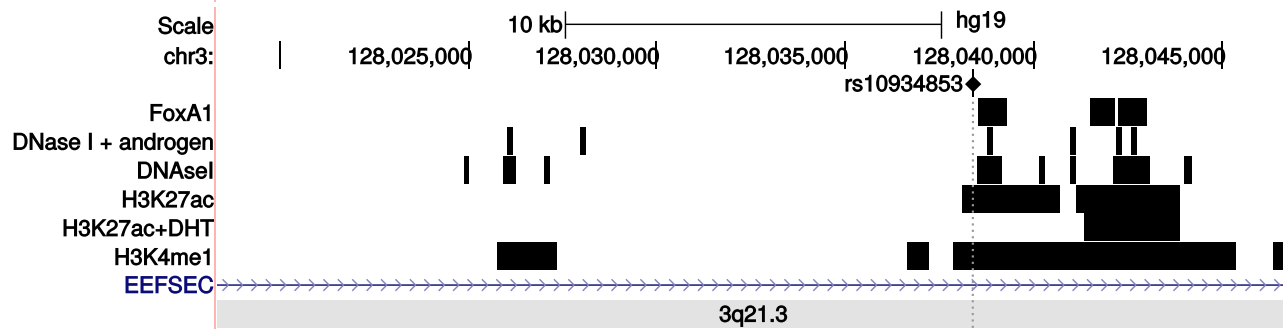



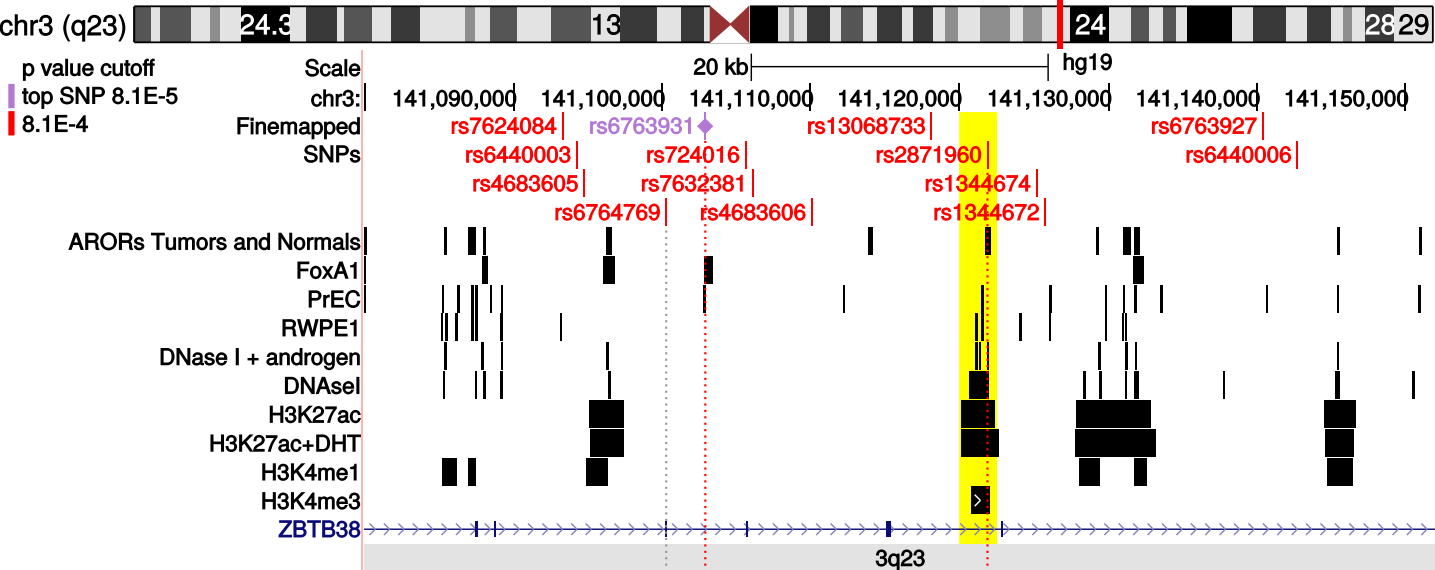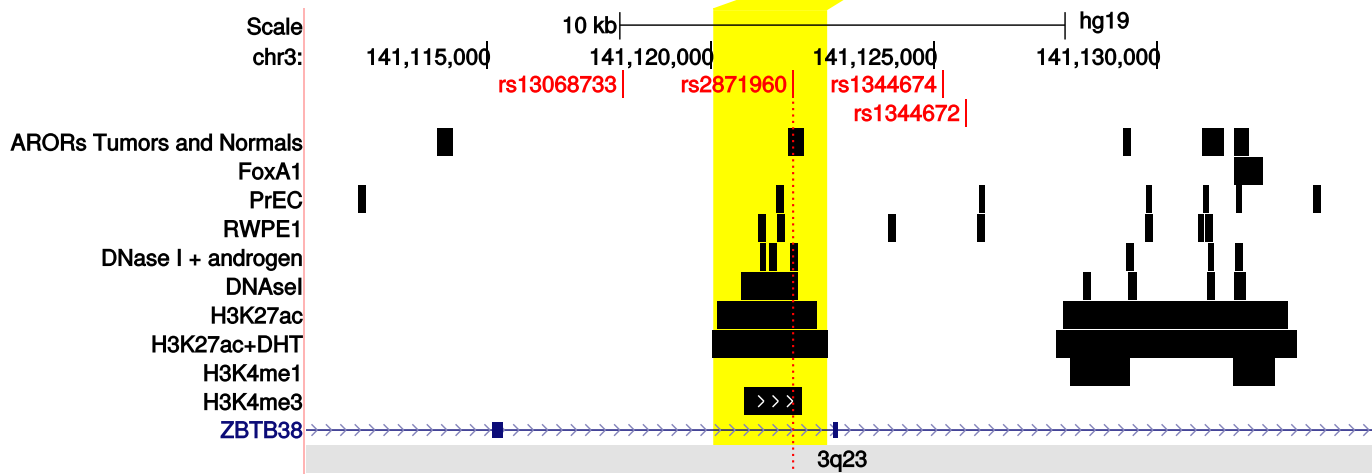

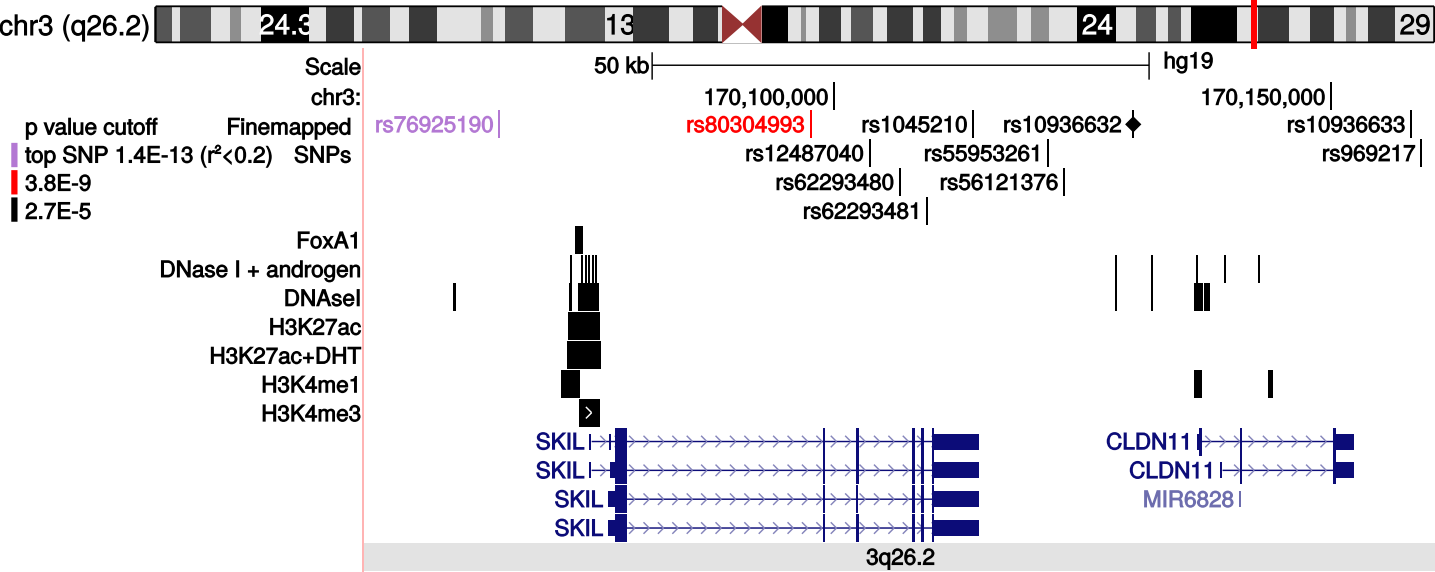

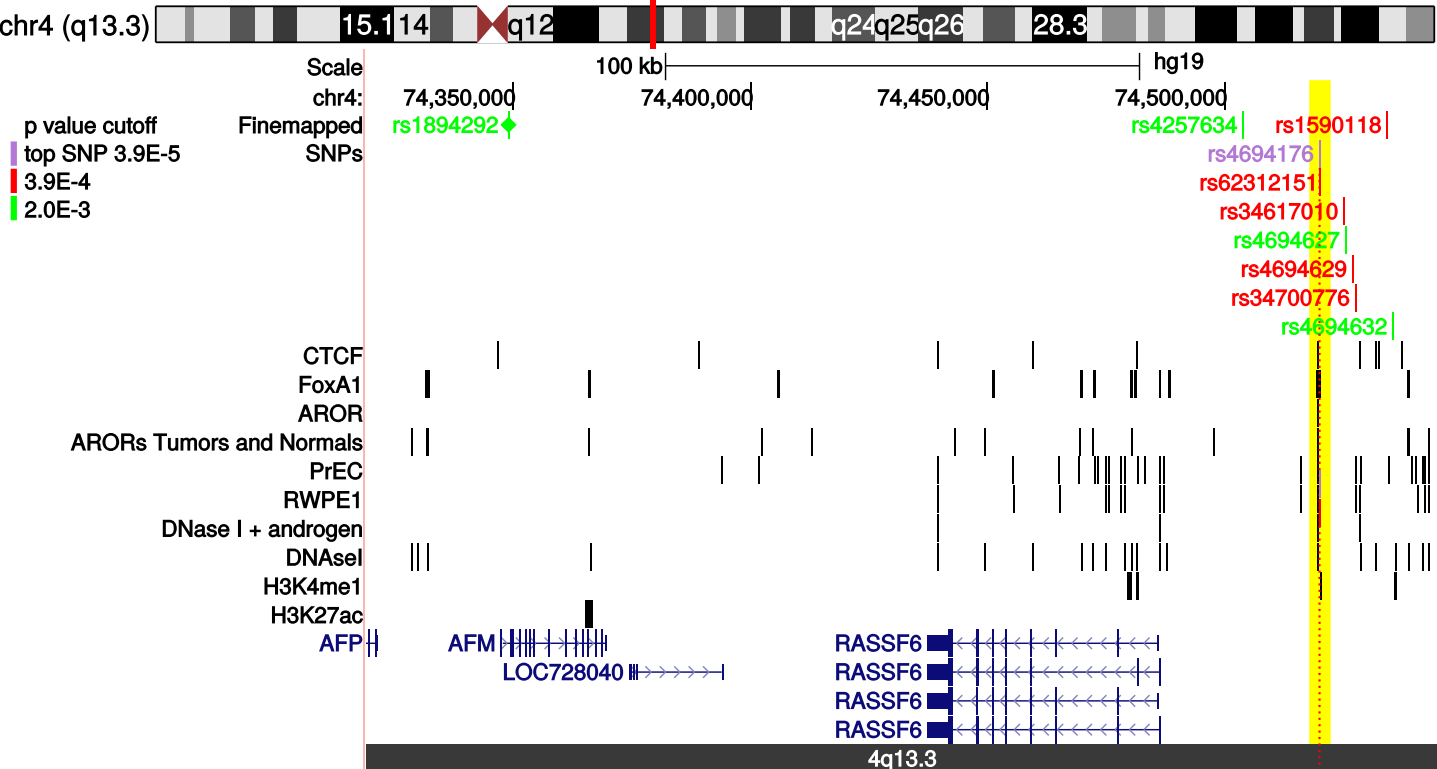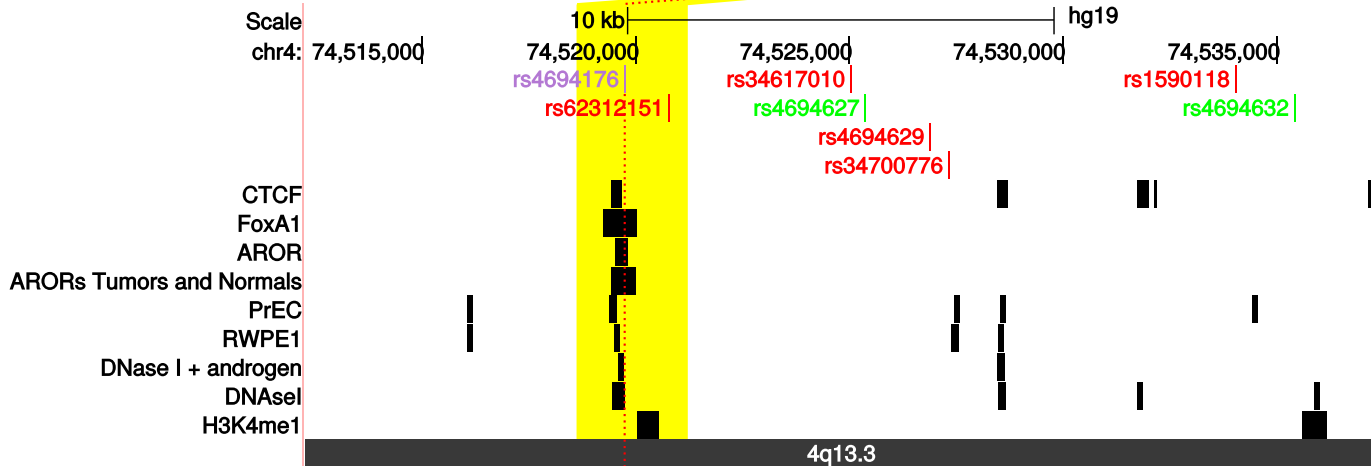

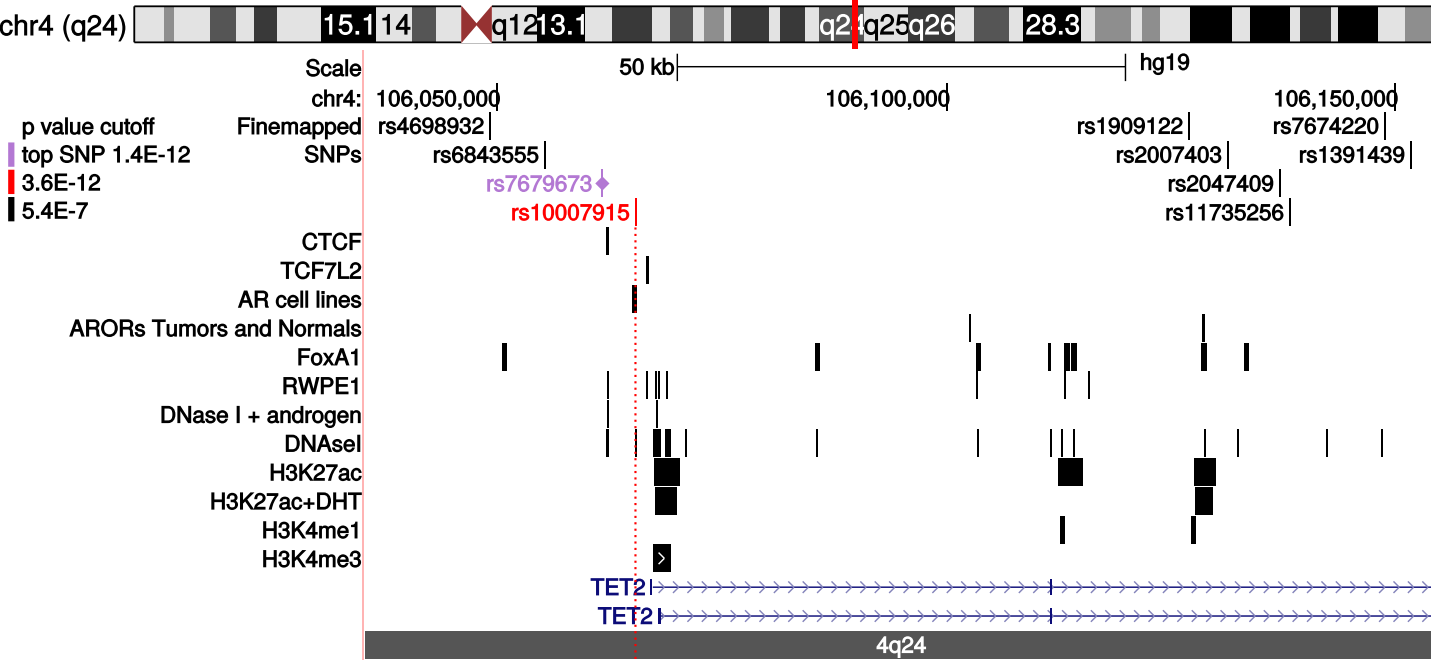



chr5 (p15.33)

11.2

q14.3 15

32

5q34

Scale

10 kb

hg19

chr5:

1,280,000

1,285,000

1,290,000

1,295,000

p value cutoff

Finemapped

rs2242652

rs72709458

rs74682426

rs7712562

top SNP 1.7E-7

SNPs

rs4975538

rs4449583

rs7449190

1.7E-6

rs7726159

rs7705526

1.7E-5

rs7725218

1.7E-4

PrEC

5.3E-4

RWPE1

DNase I + androgen

DNaseI

H3K4me1

H3K4me3

TERT

TERT

5p15.33

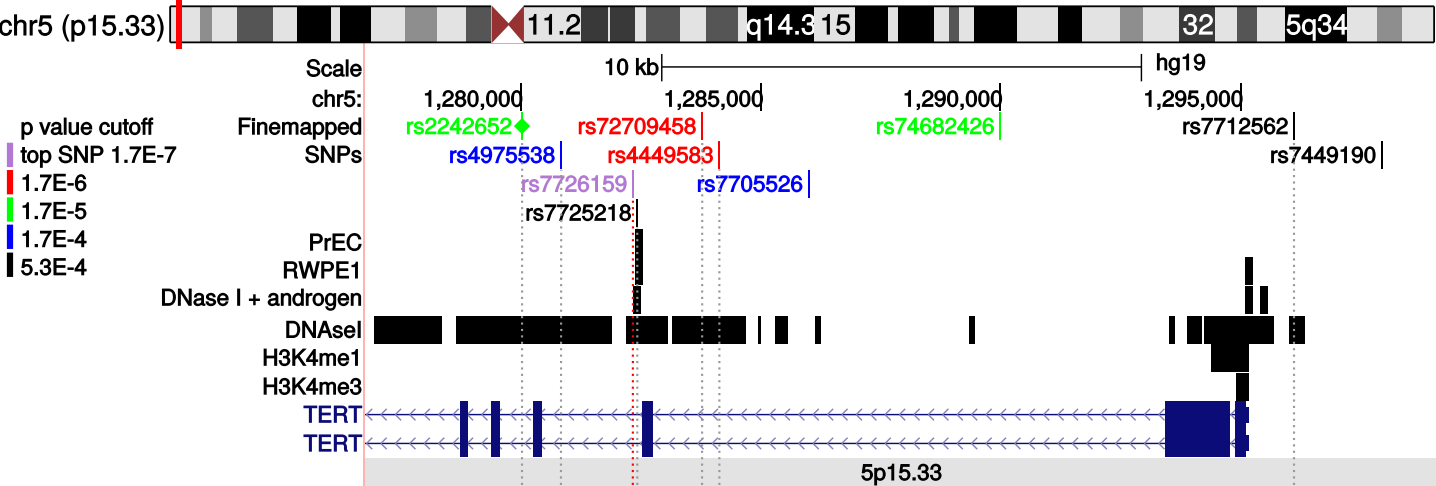

chr5 (p15.33)

11.2

q14.3 15

32

5q34

Scale

5 kb

hg19

p value cutoff

Finemapped

1,890,000

1,895,000

1,900,000

top SNP 2.2E-16

SNPs

rs12655062

rs4975758

rs12653946

2.2E-15

rs10866527

rs13177600

2.2E-14

rs10866528

rs35010507

2.2E-13

rs4975759

8.9E-13

rs34695572

ARORs Tumors and Normals

PrEC

RWPE1

DNase I + androgen

DNaseI

H3K27ac

H3K27ac+DHT

H3K4me1

H3K4me3

IRX4

IRX4

IRX4

IRX4

CTD-2194D22.4

5p15.33

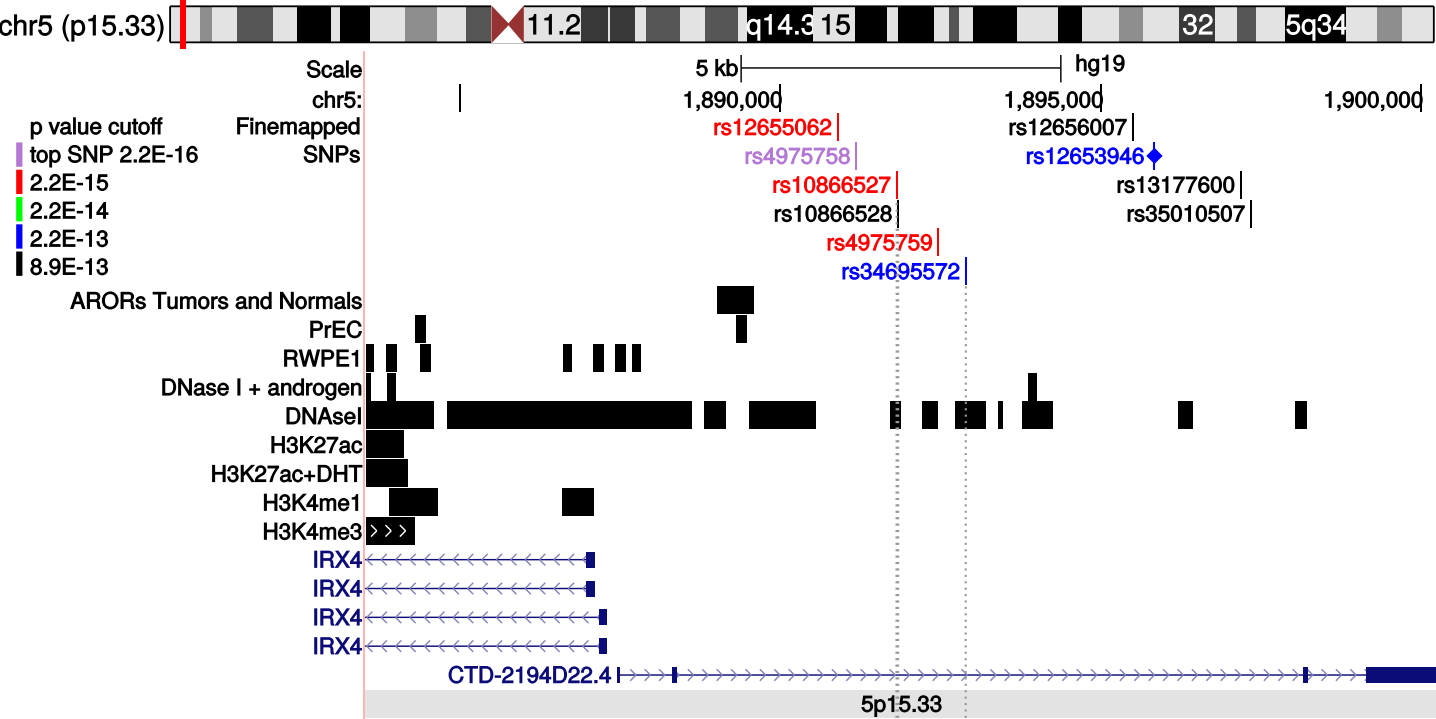

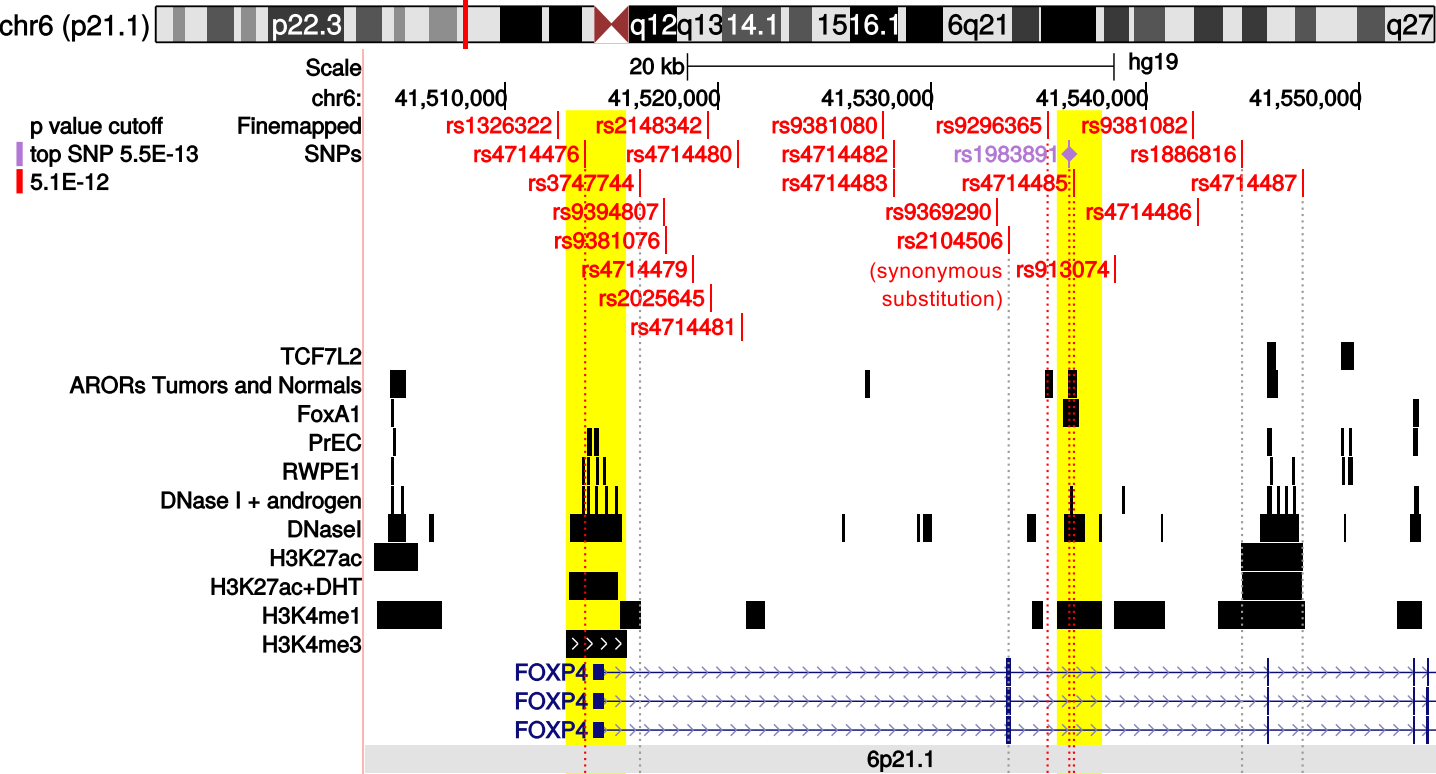

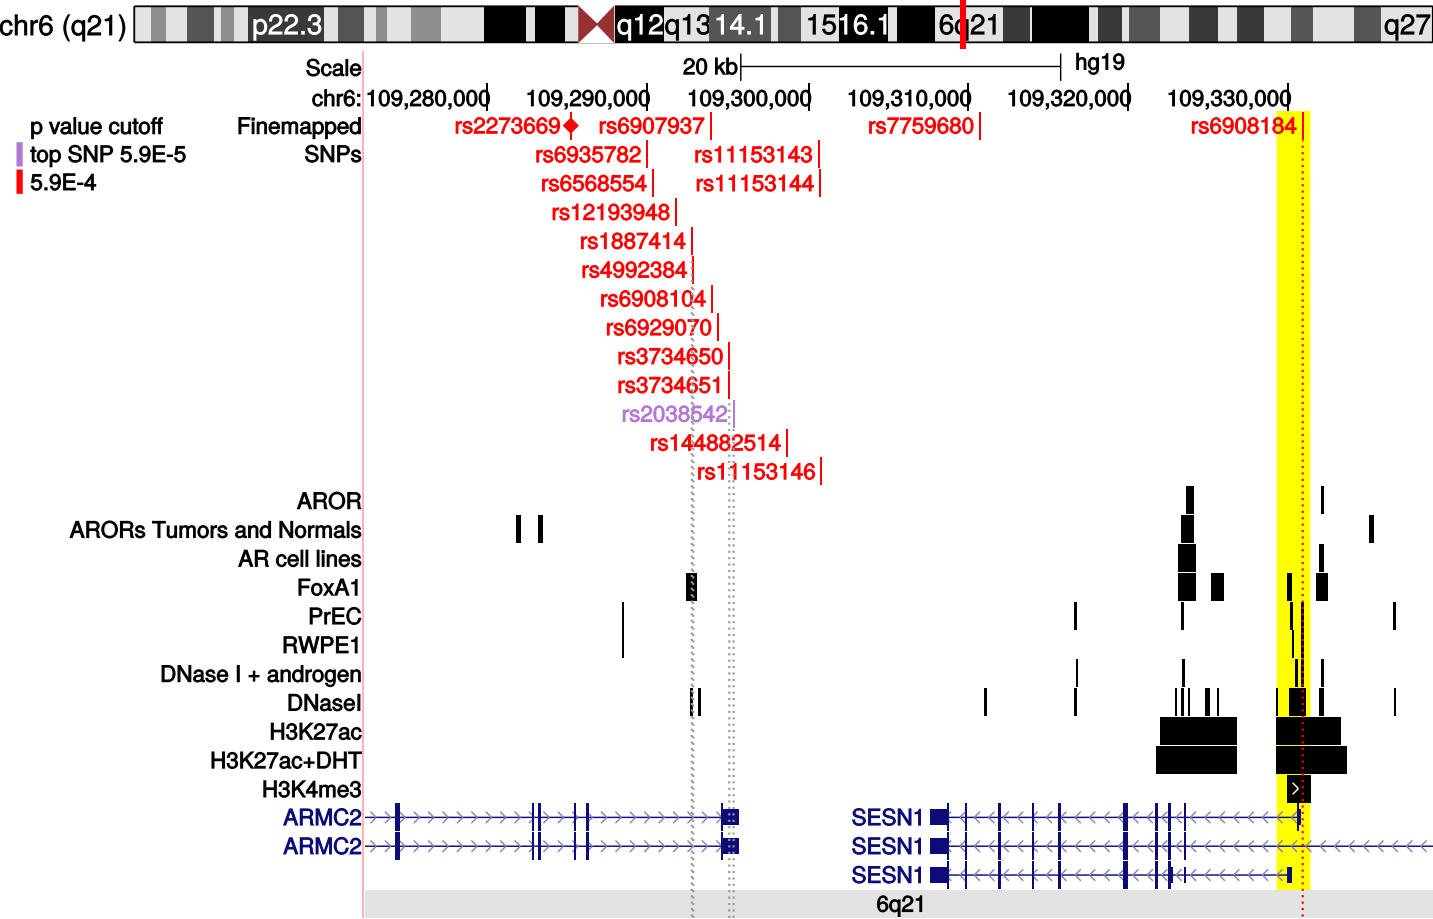

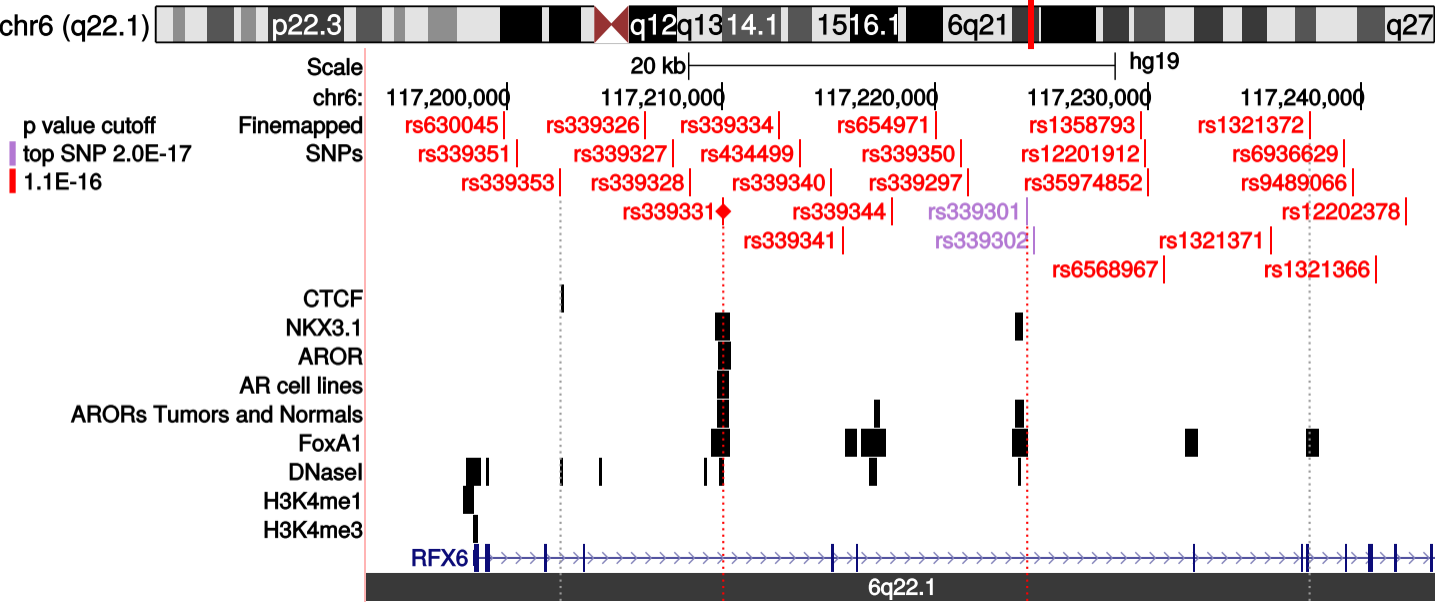

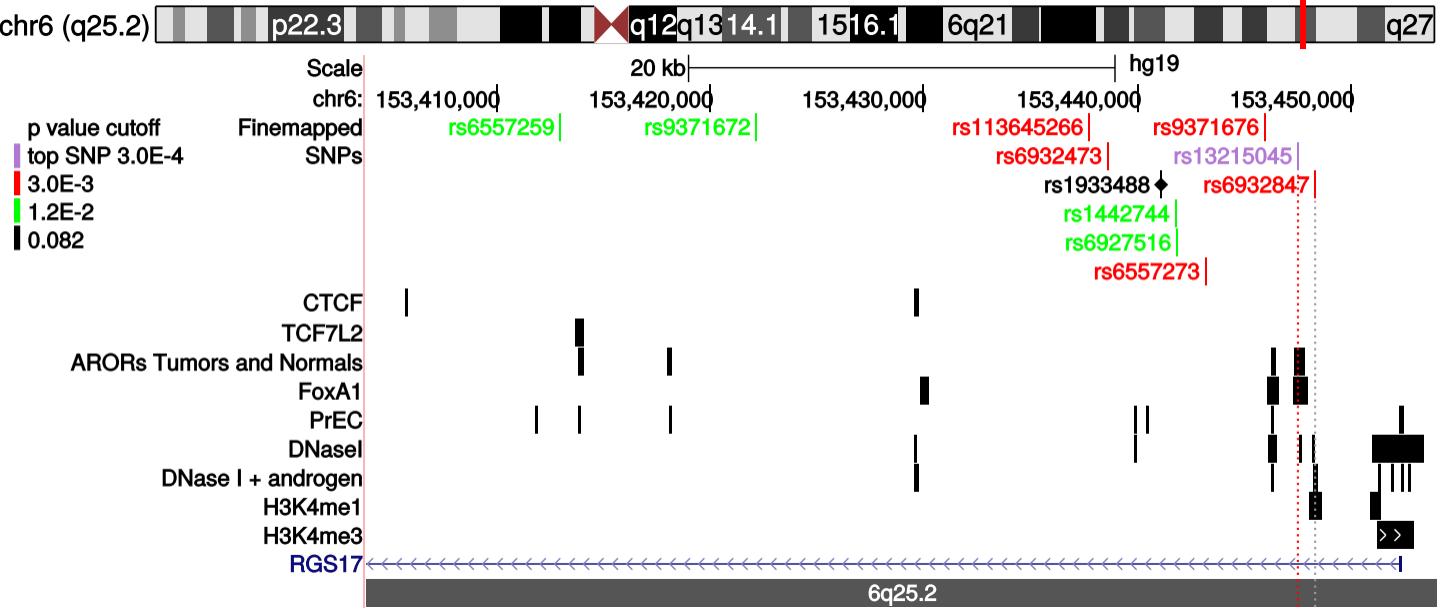

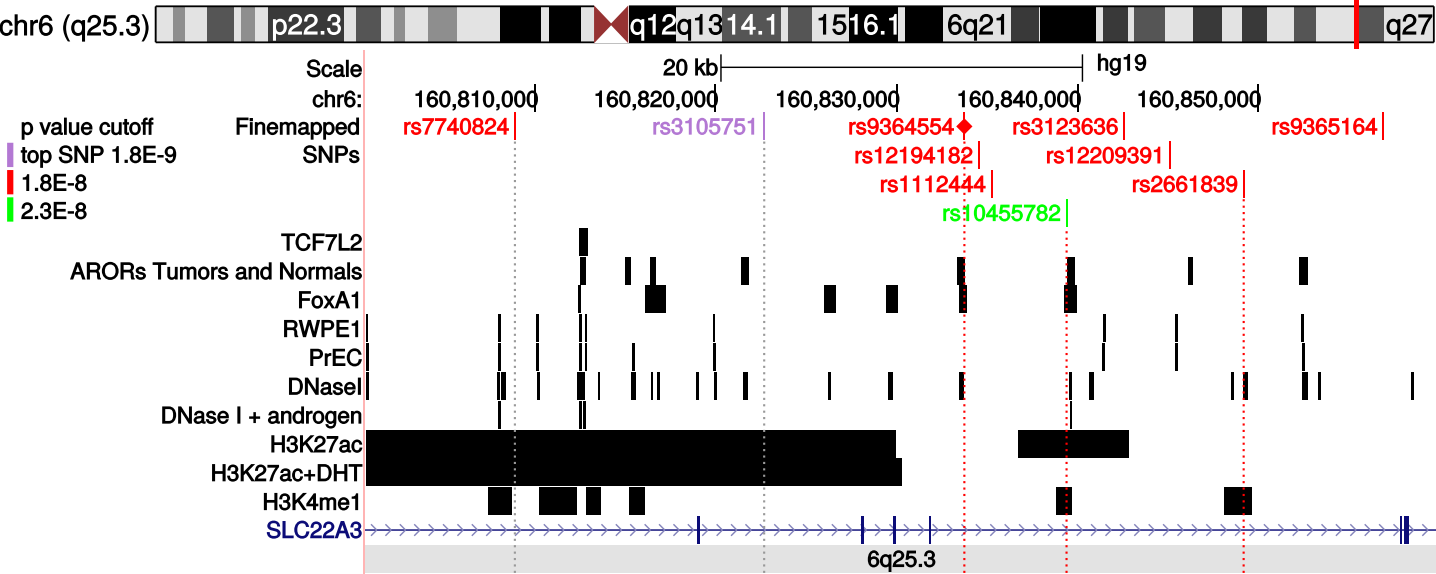

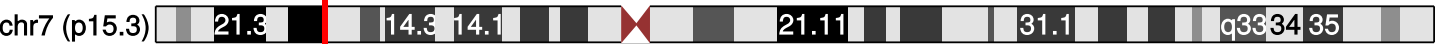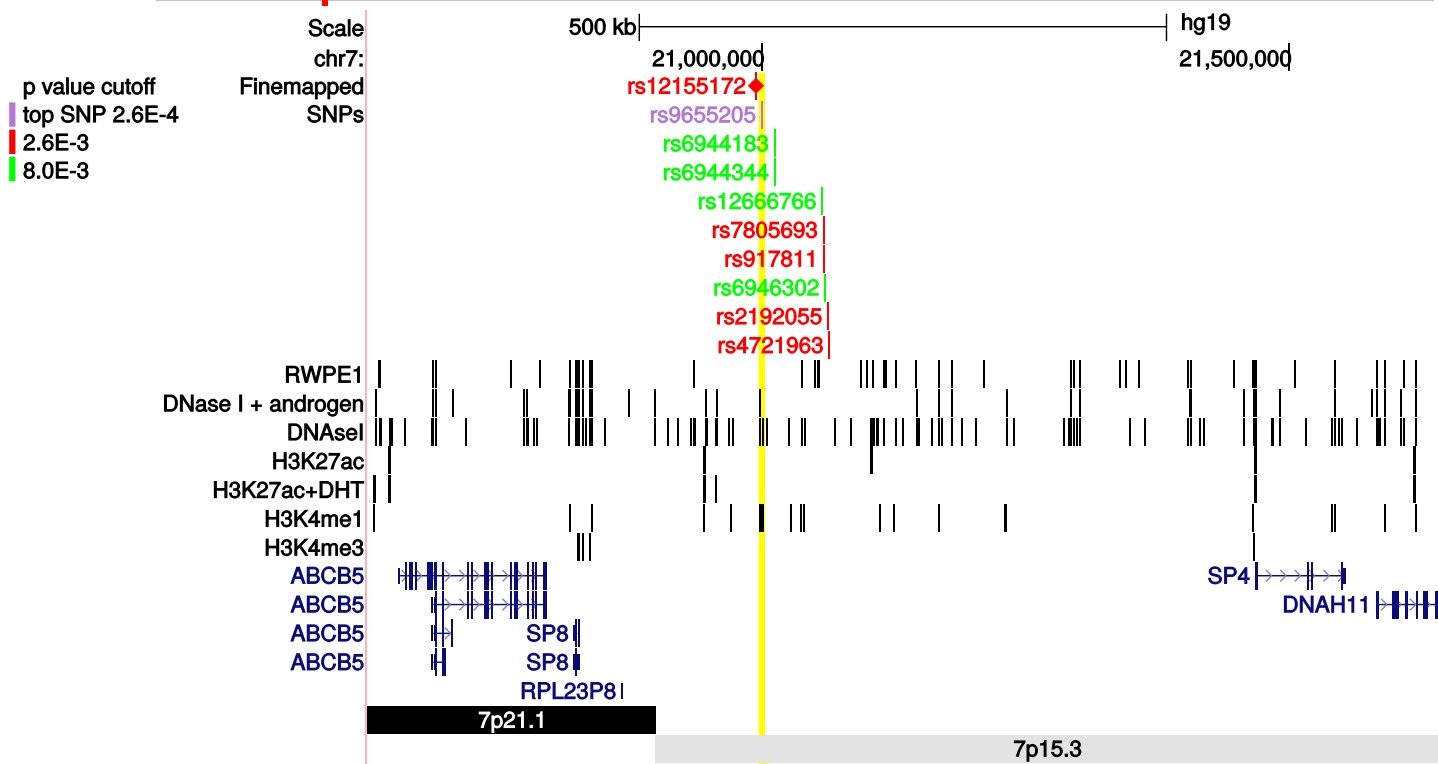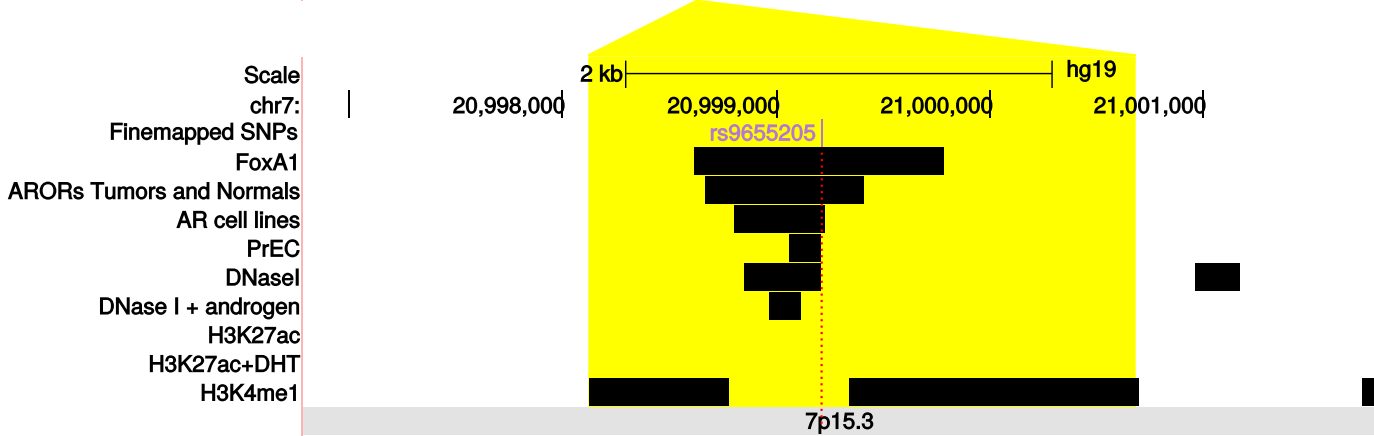



chr7 (p15.2-p15.1) | 21.3 | 21.11 | 31.1 | q333435

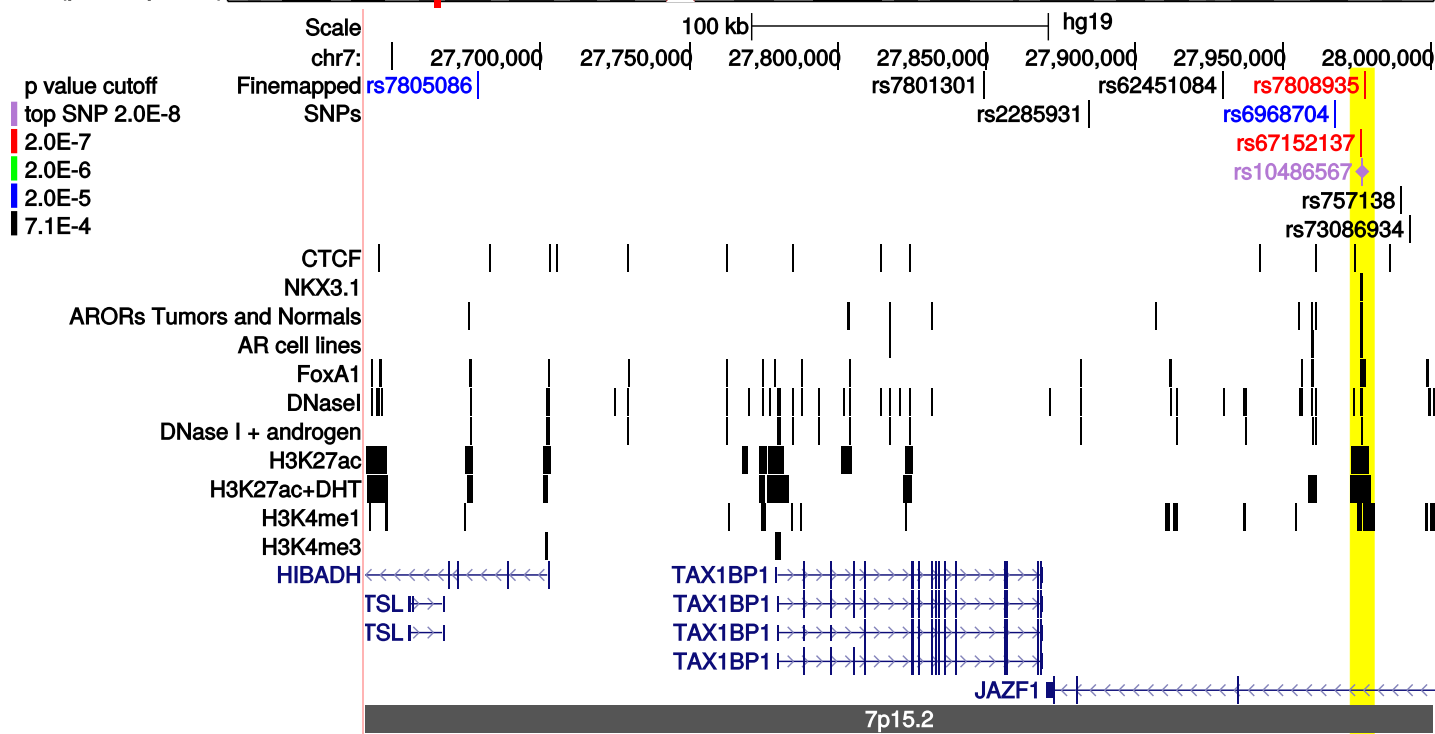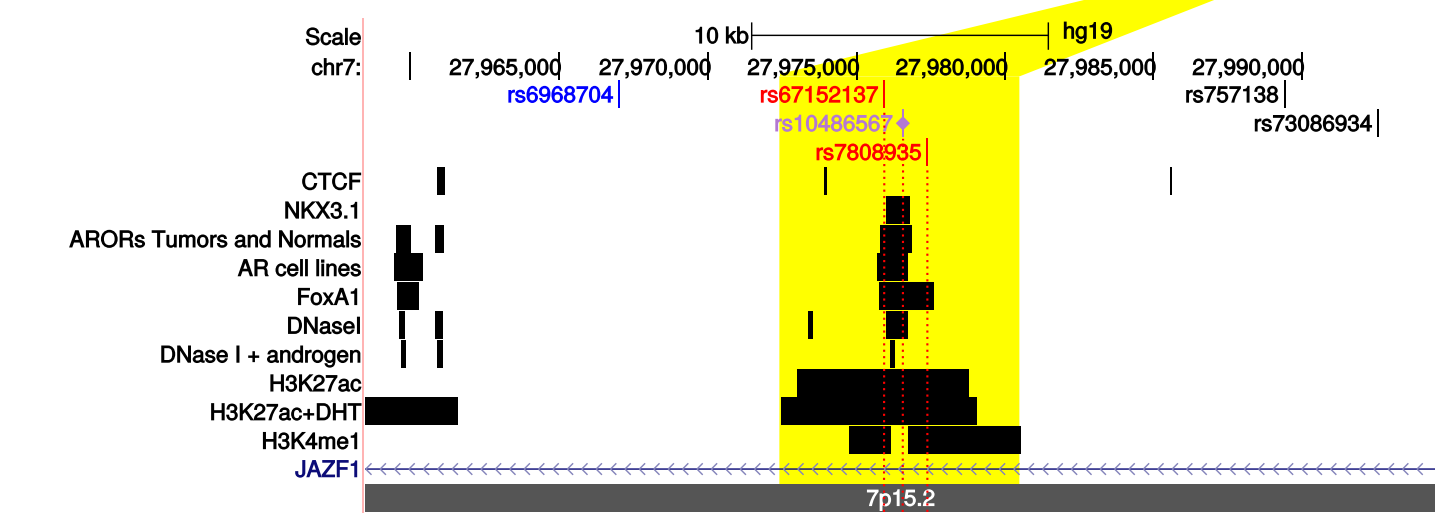

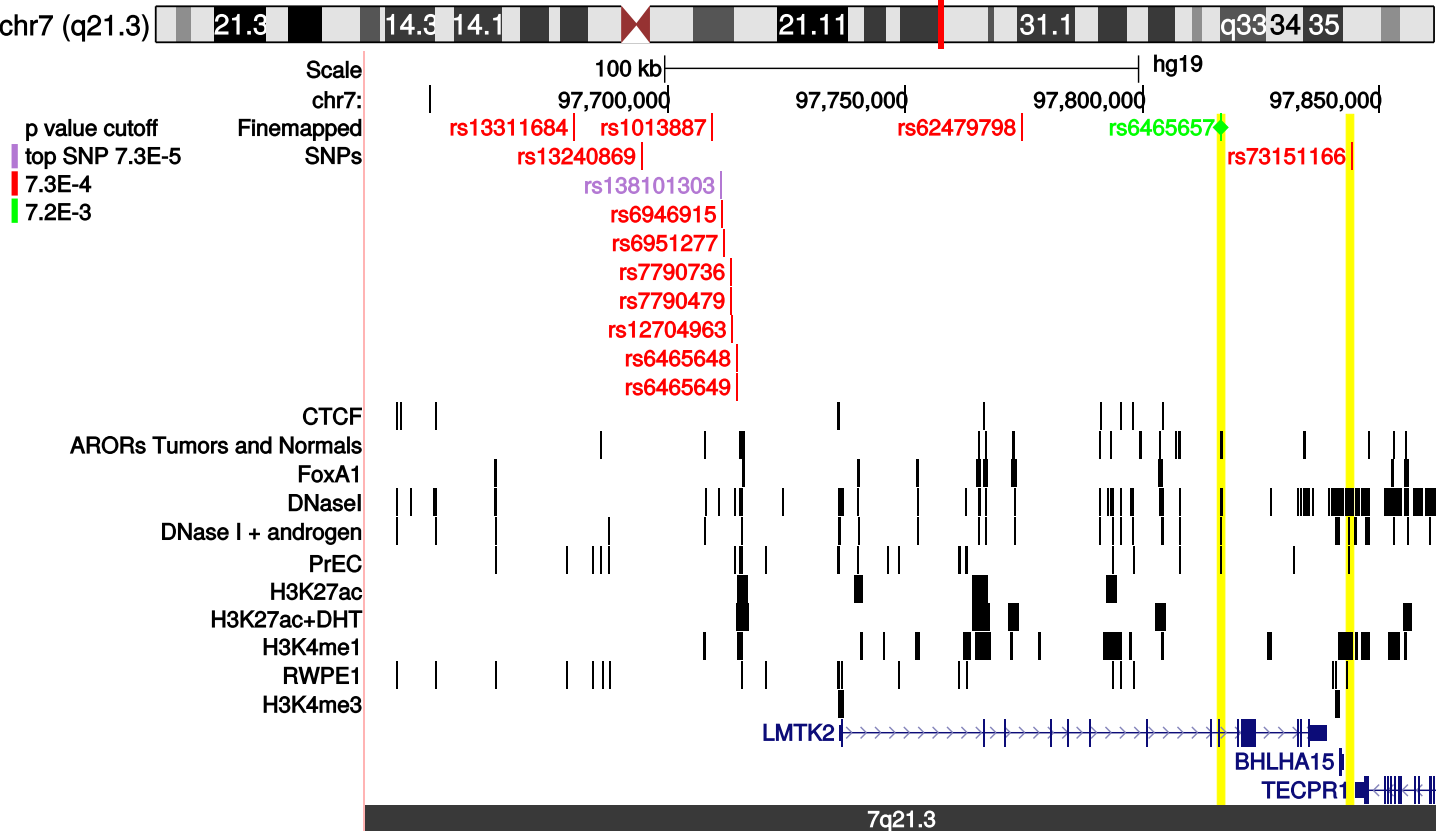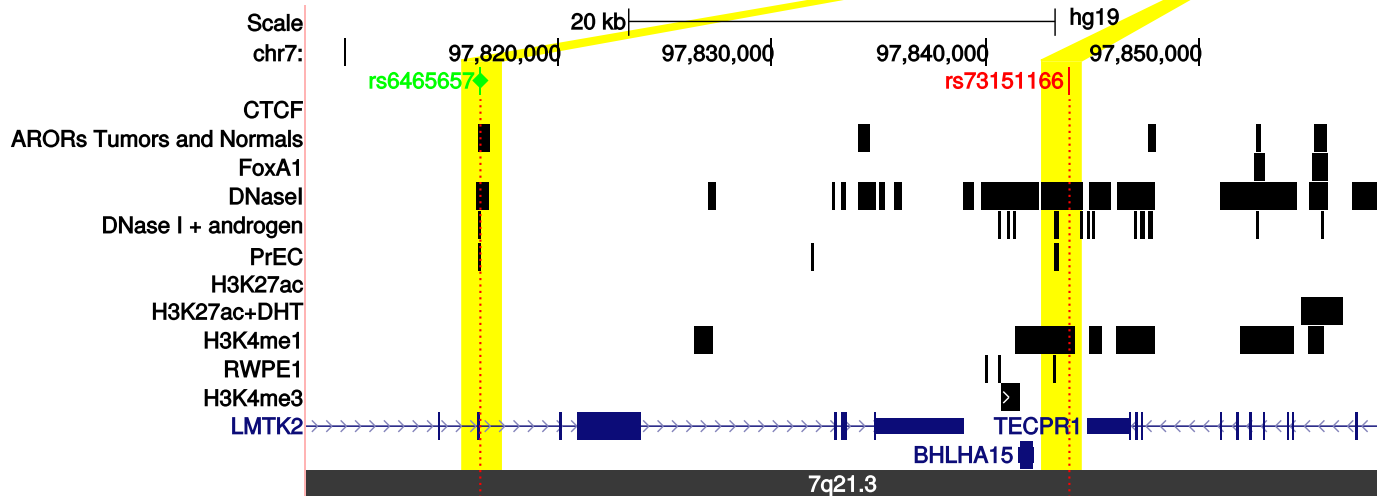

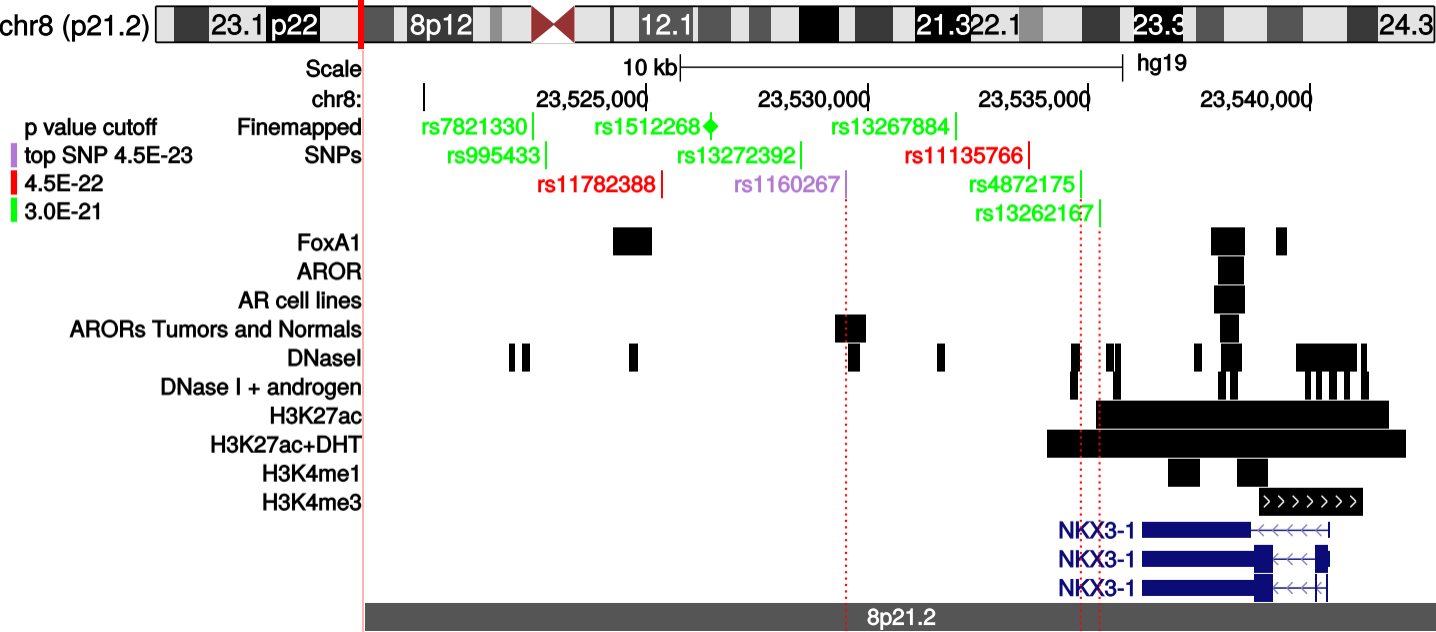

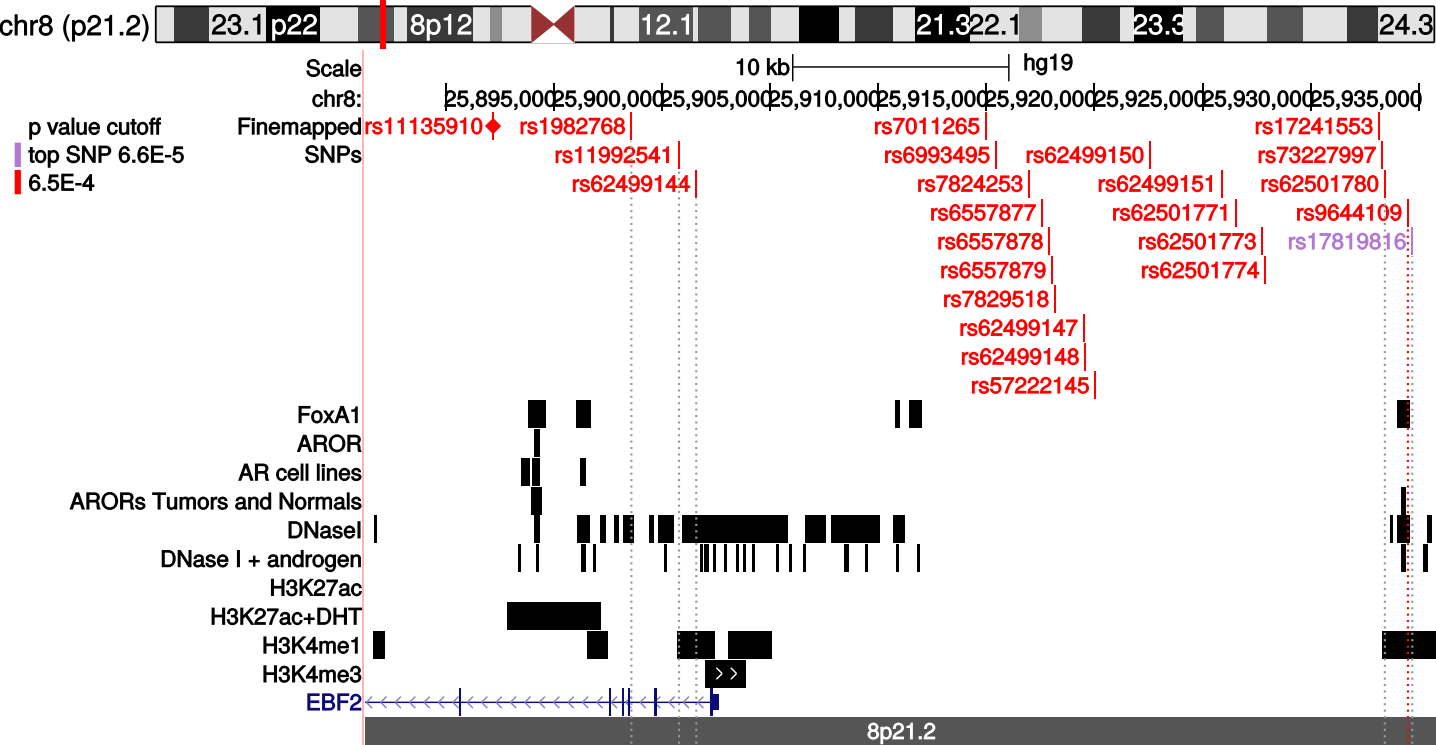

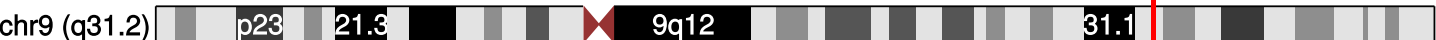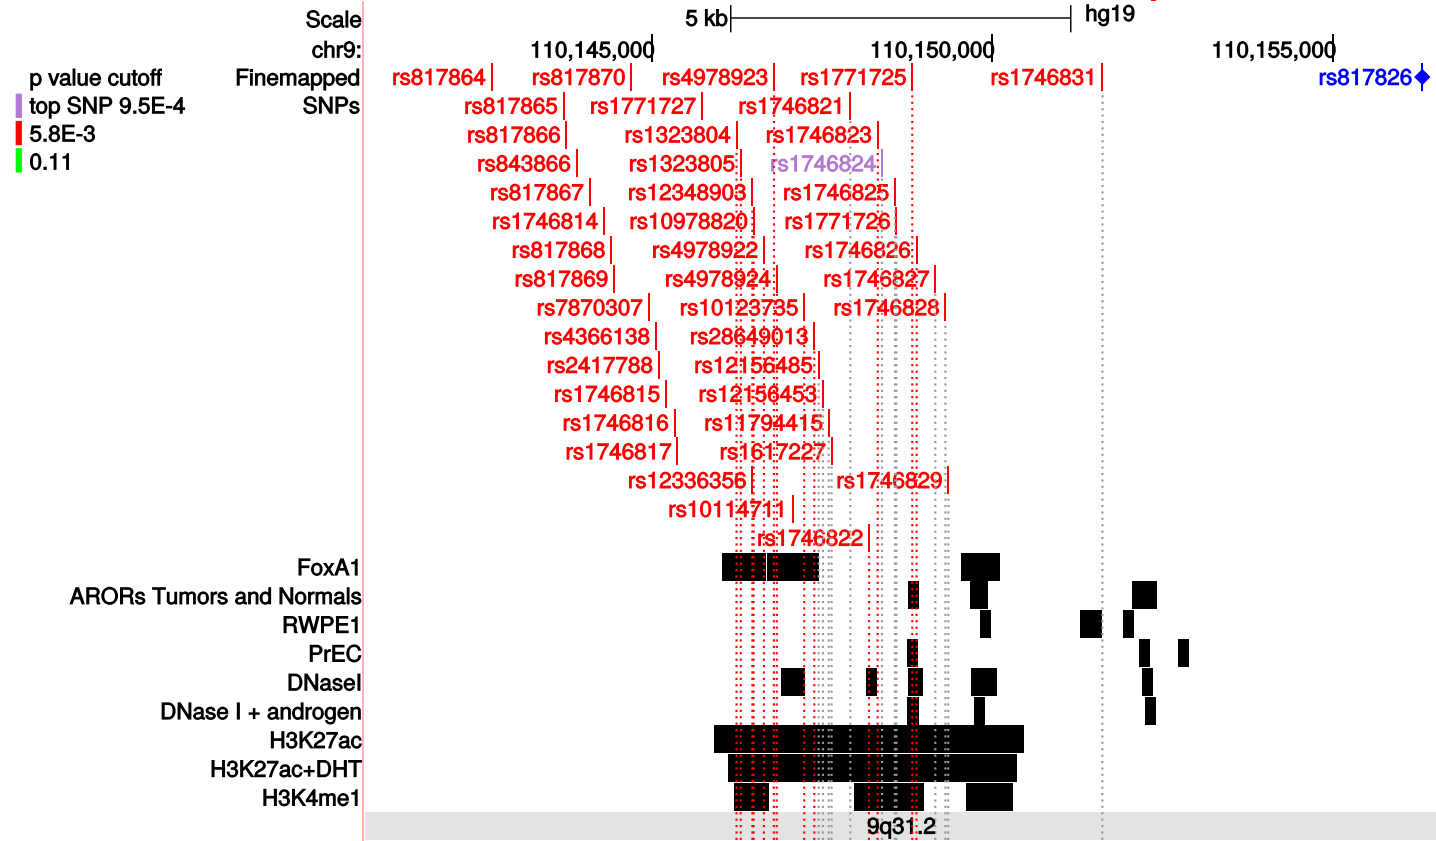

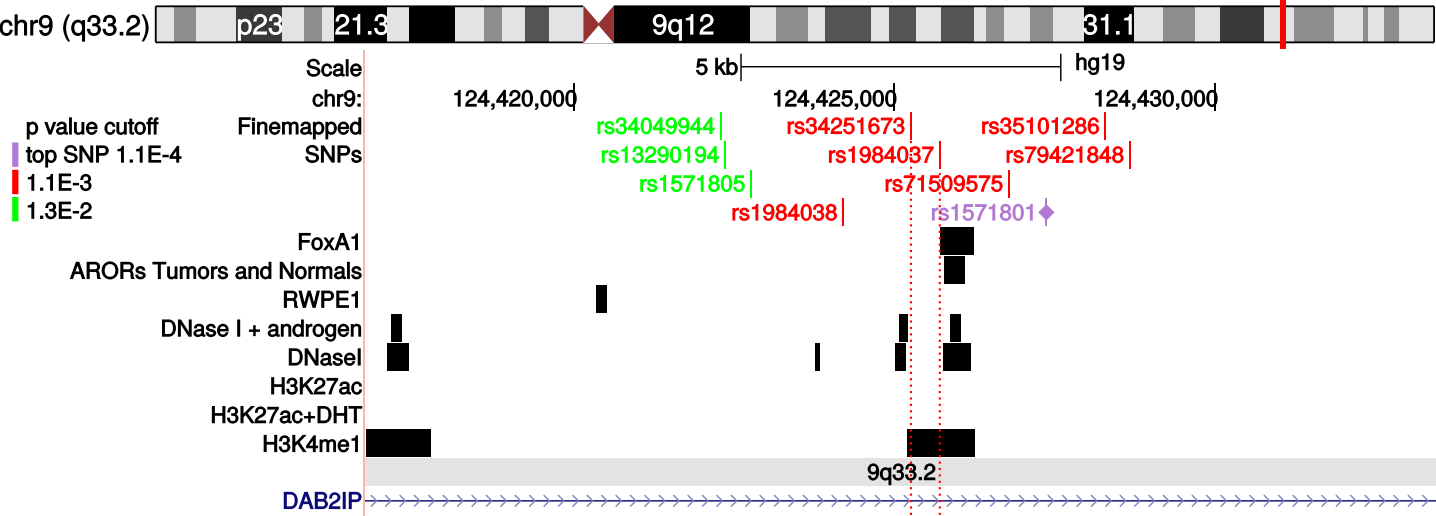

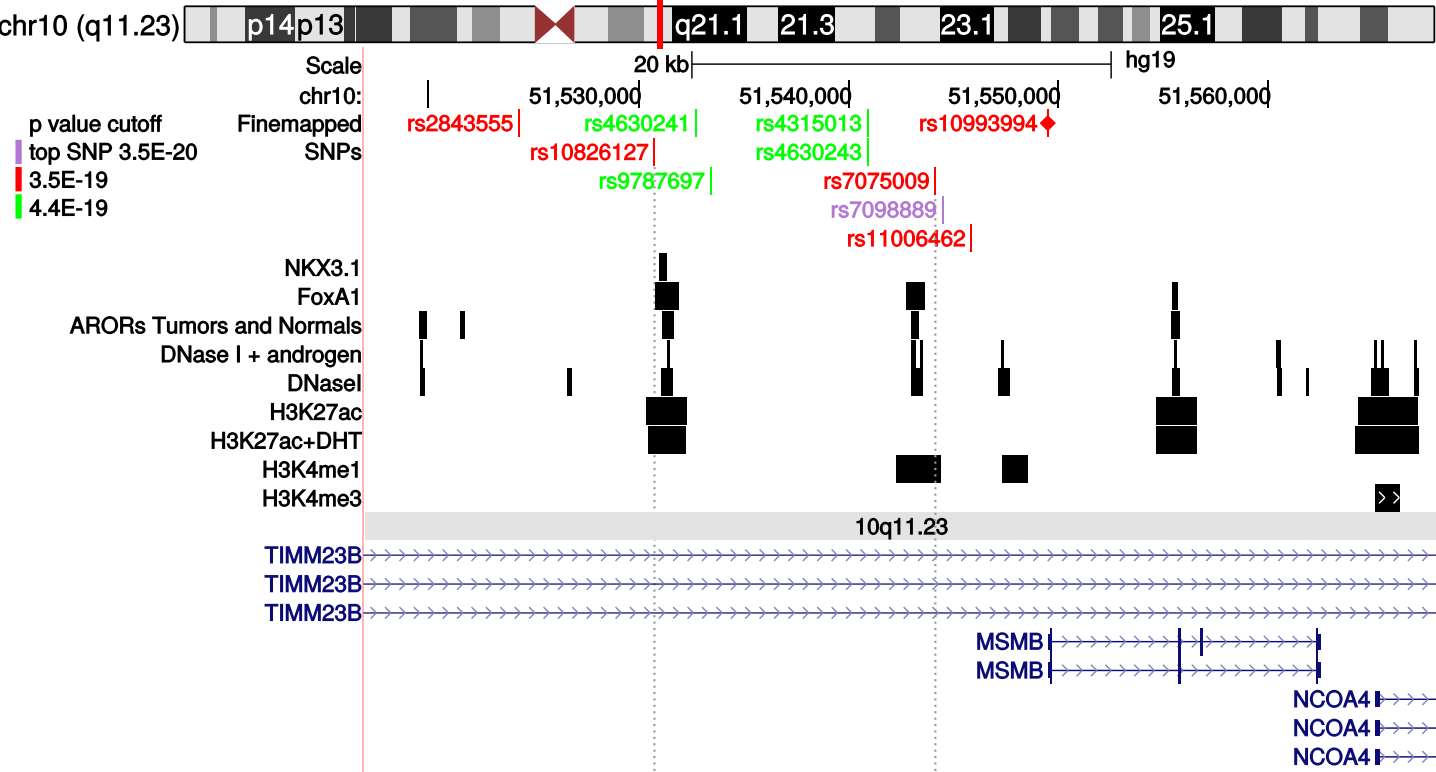

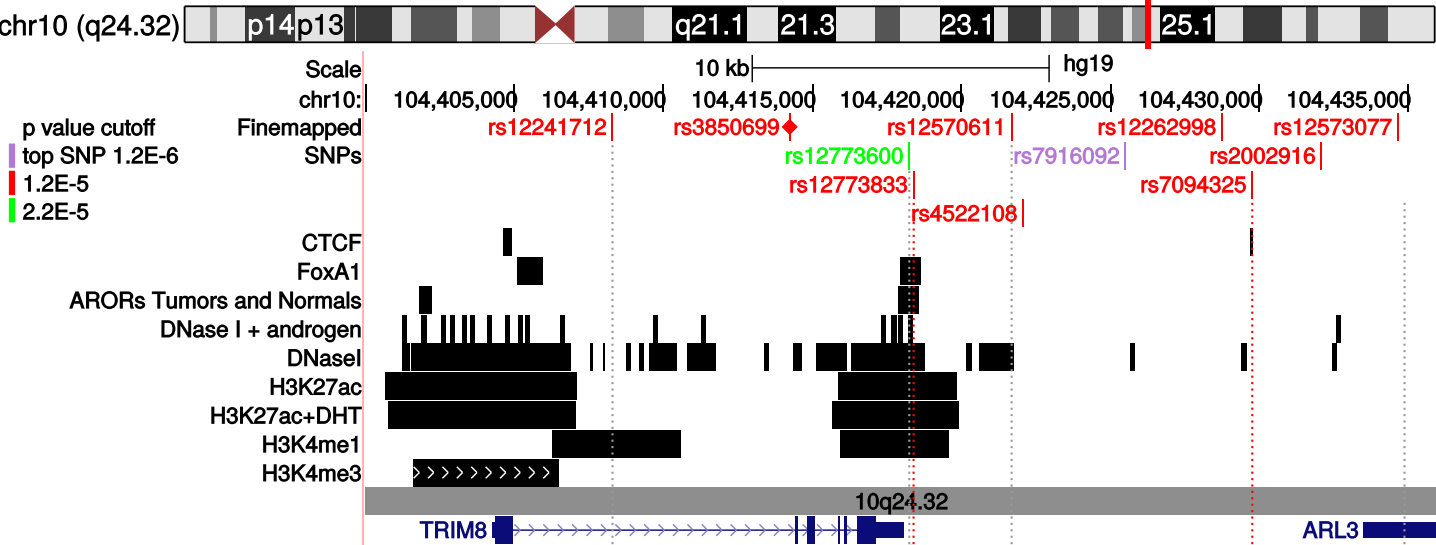

response elements:

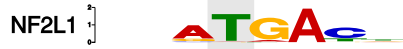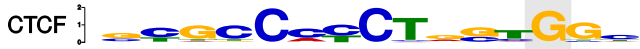

genomic sequence:

**GACGAAG**

**GCCCCCTCTACTGGT**

variant:

rs12773833: C/T OR:1.09

rs7094325: G/C OR:1.09



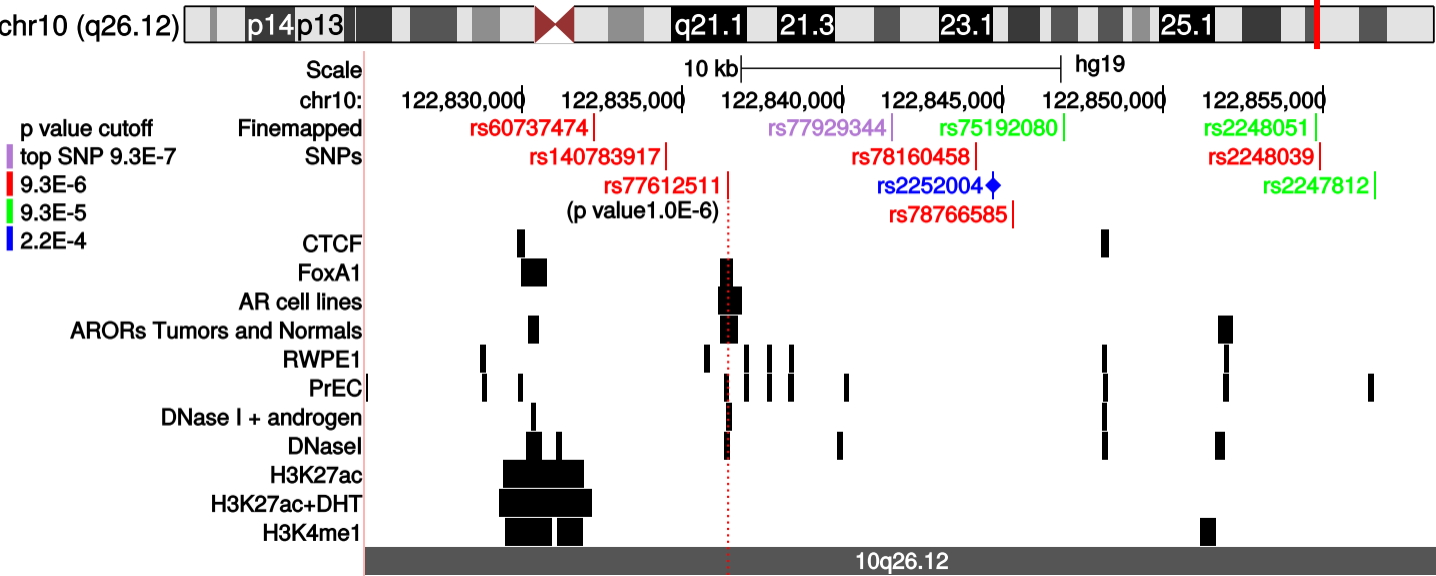

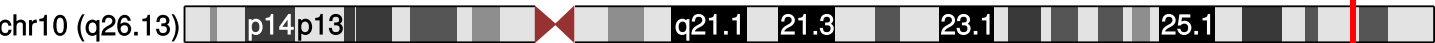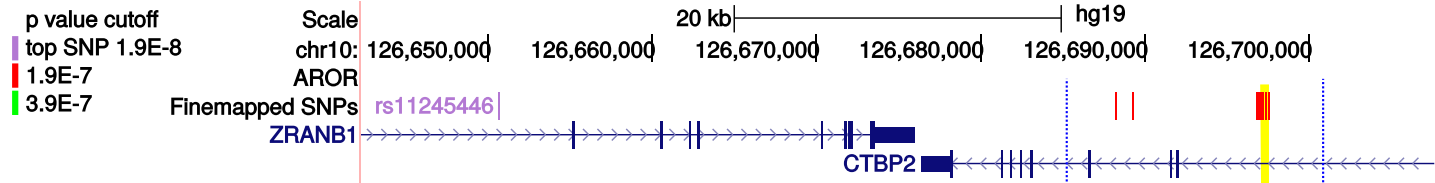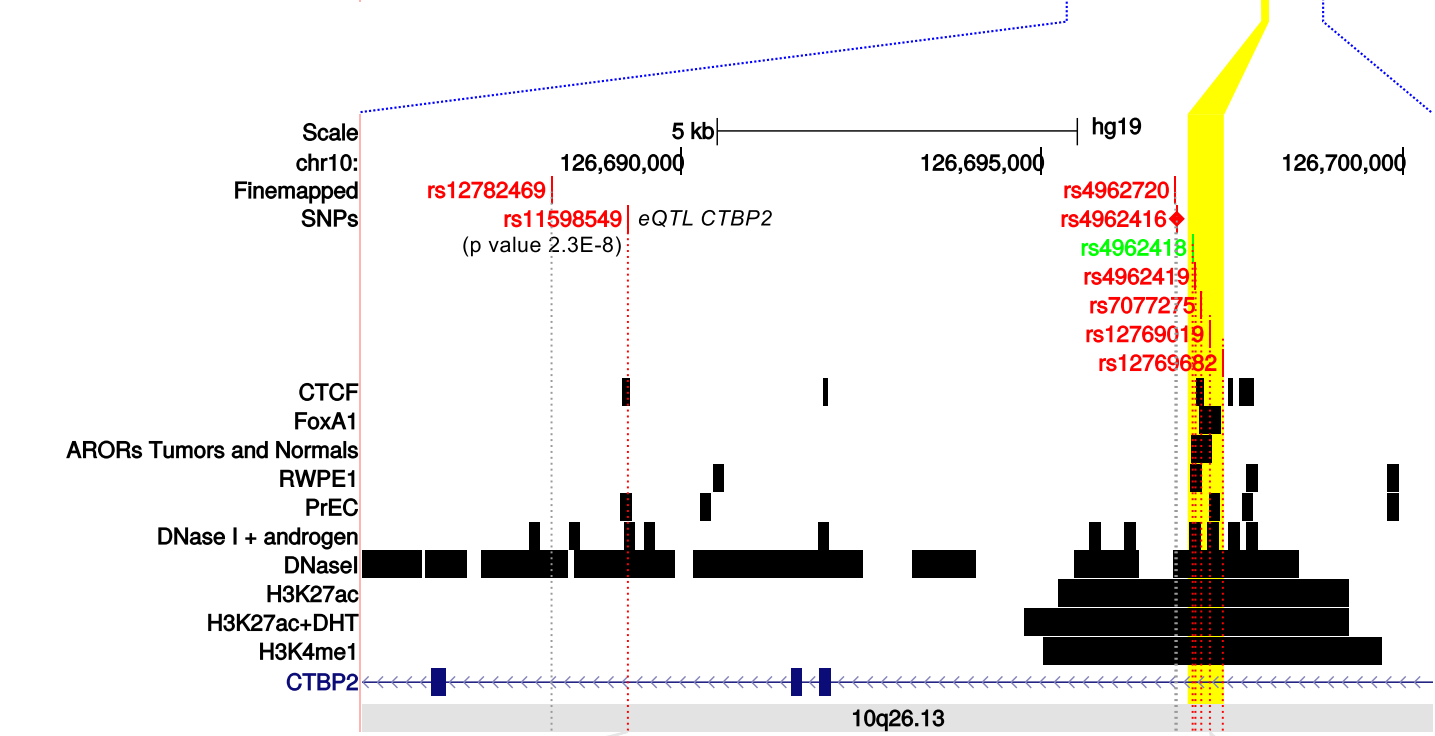

response elements:

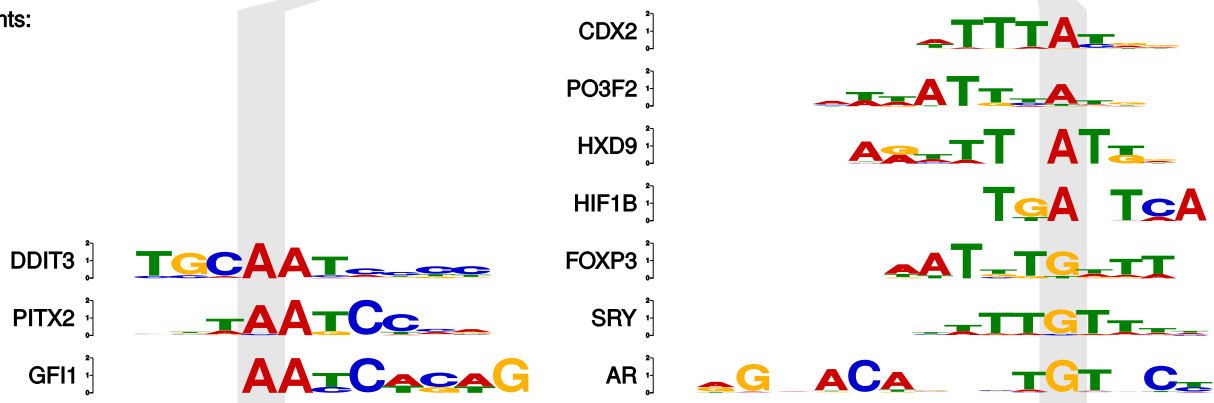

genomic sequence:

TCGGATCCCAG      AGGCAAATTTATTCA

variant:

rs11598549: A/G OR:1.14      rs12769019: G/A OR: 1.12

chr11 (p15.5) | p15.4 | 15.1 | p13 | p12 | 11.2 | q14.1 | 21 | q22.3 | q23.3 | 25

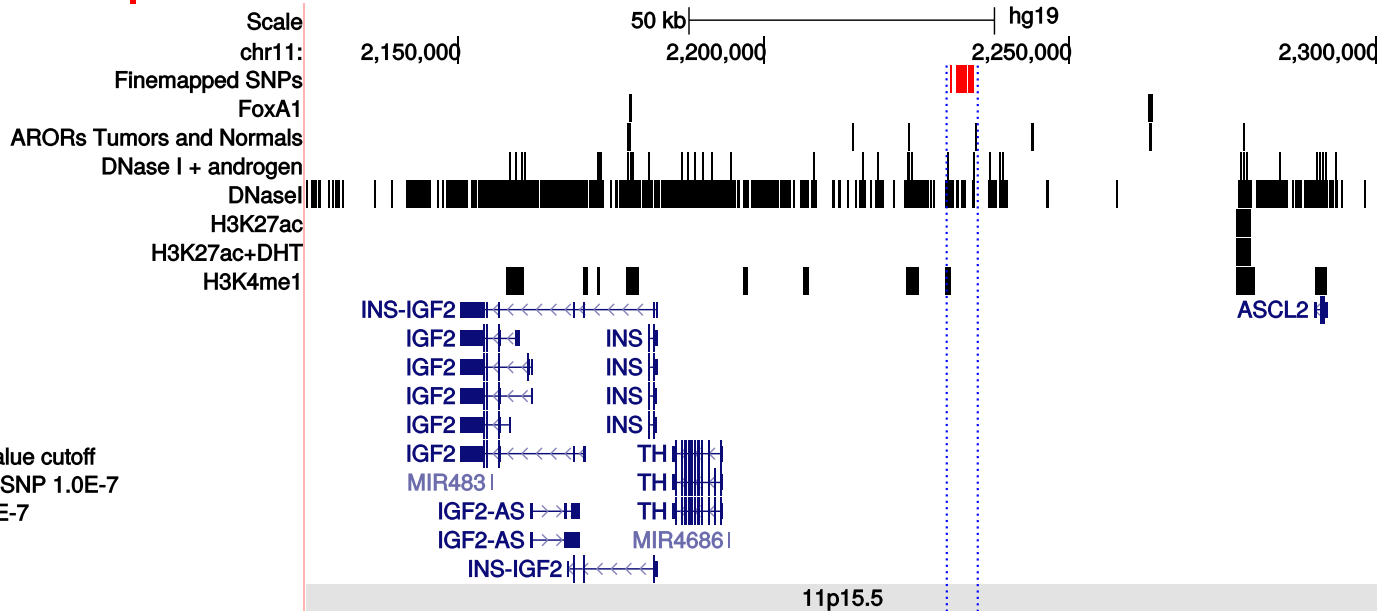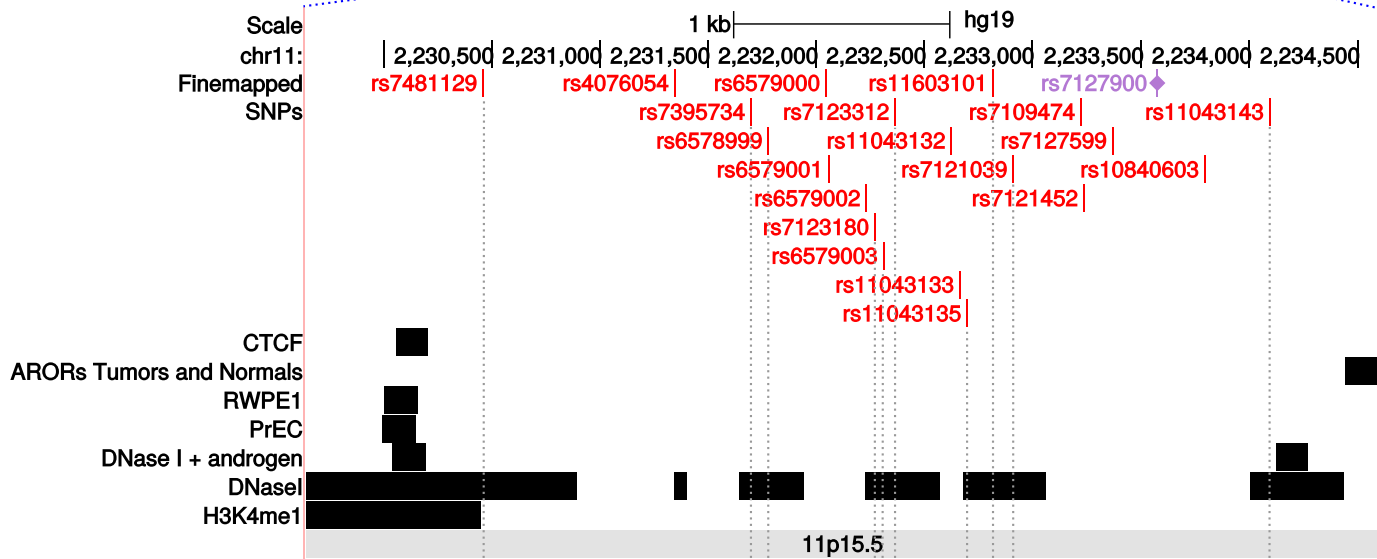

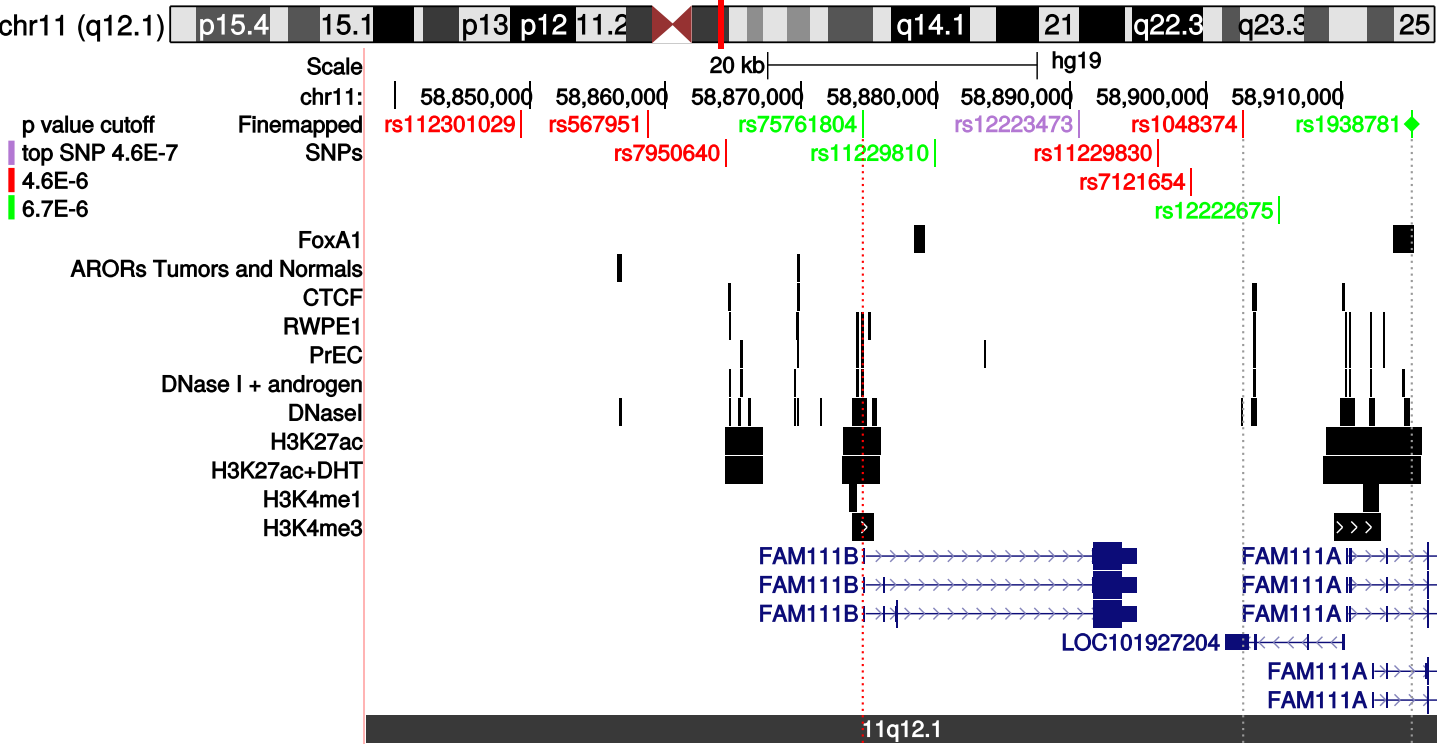

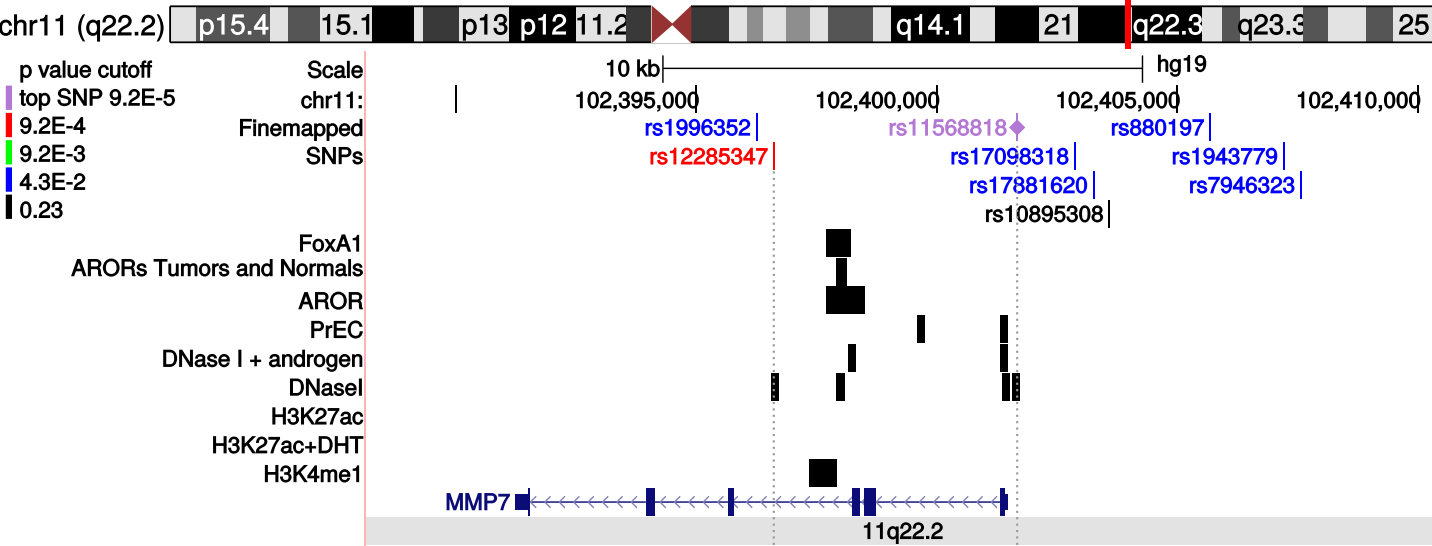

chr12 (q13.12)

12.3

12.1

12q12

15

2223.1

23.3

Scale

10 kb

hg19

chr12:

49,665,000

49,670,000

49,675,000

p value cutoff

Finemapped

chr12:49666509

rs2335232

rs11168963

rs10875943

top SNP 2.4E-5

SNPs

rs3858586

rs6580706

2.4E-4

rs76907016

2.4E-3

rs56222401

8.9E-3

rs11168962

rs7975527

TCF7L2

ARORs Tumors and Normals

DNase I + androgen

DNaseI

H3K27ac

H3K27ac+DHT

H3K4me1

H3K4me3

TUBA1C

12q13.12

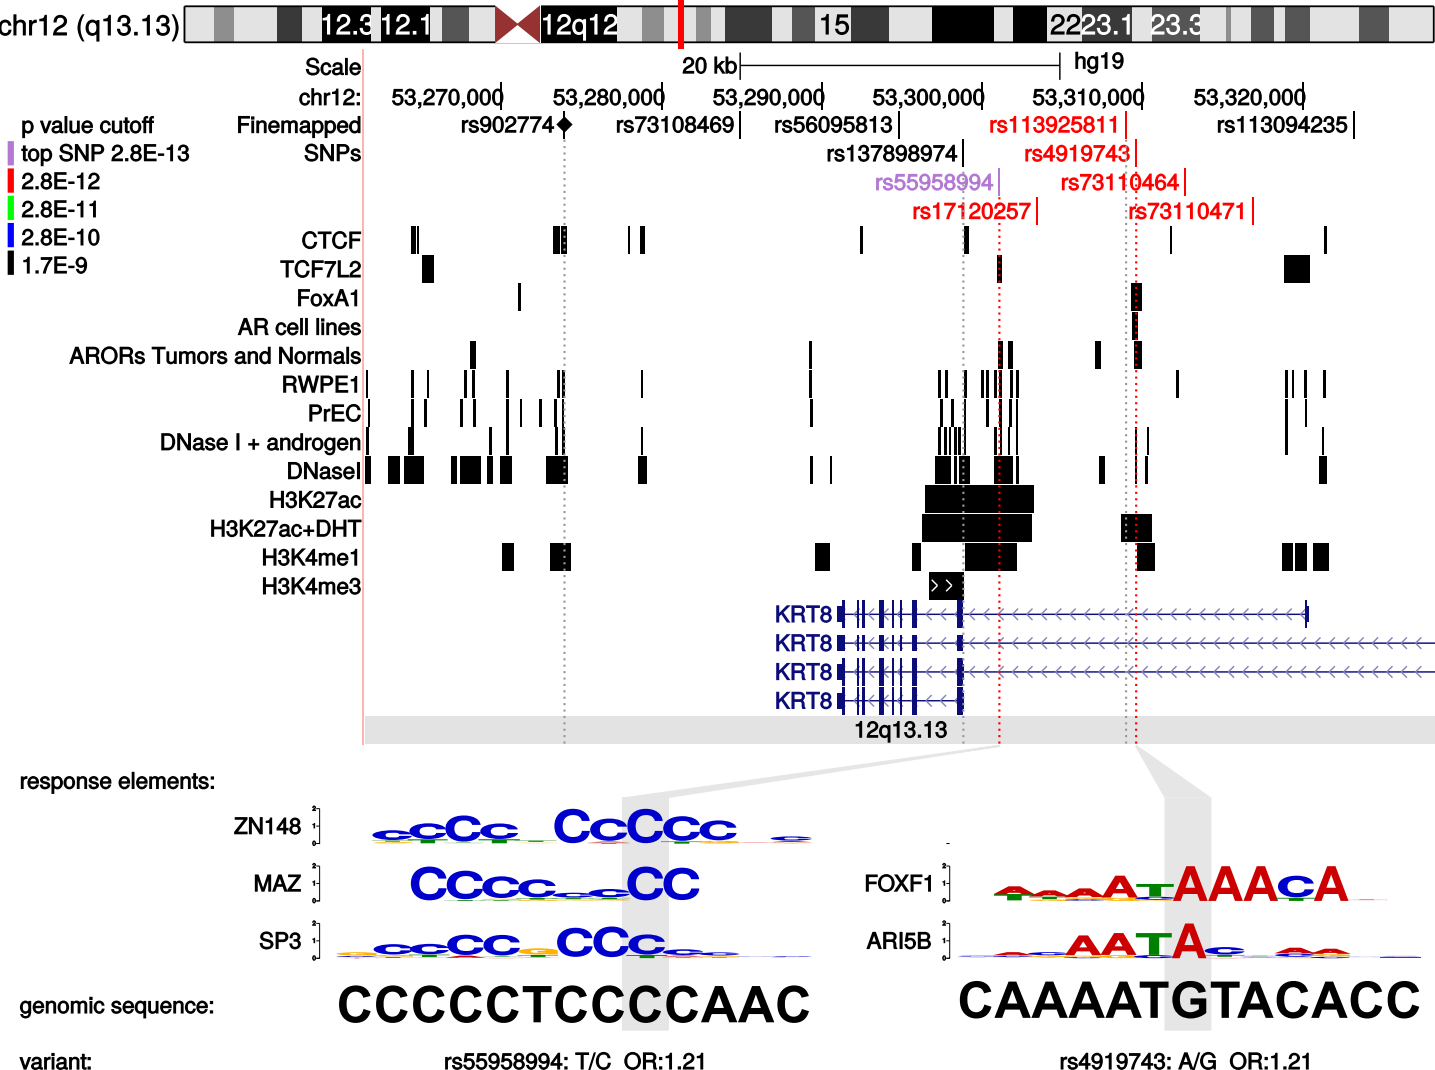

chr12 (q24.21)

12.3 12.1

12q12

15

2223.1 23.3

Scale

200 kb

hg19

chr12:

114,500,000

114,600,000

114,700,000

114,800,000

p value cutoff

Finemapped

top SNP 2.2E-8

SNPs

2.2E-7

2.2E-6

2.2E-5

3.1E-5

rs2555009

rs10774740

rs10774741

rs2555019

rs2555016

rs2701109

rs1247943

rs2555013

rs1270884

rs2555004

FoxA1

ARORs Tumors and Normals

RWPE1

PrEC

DNase I + androgen

DNaseI

H3K27ac

H3K27ac+DHT

H3K4me1

H3K4me3

RBM19

RBM19

RBM19

TBX5

TBX5

TBX5

TBX5-AS1

12q24.21



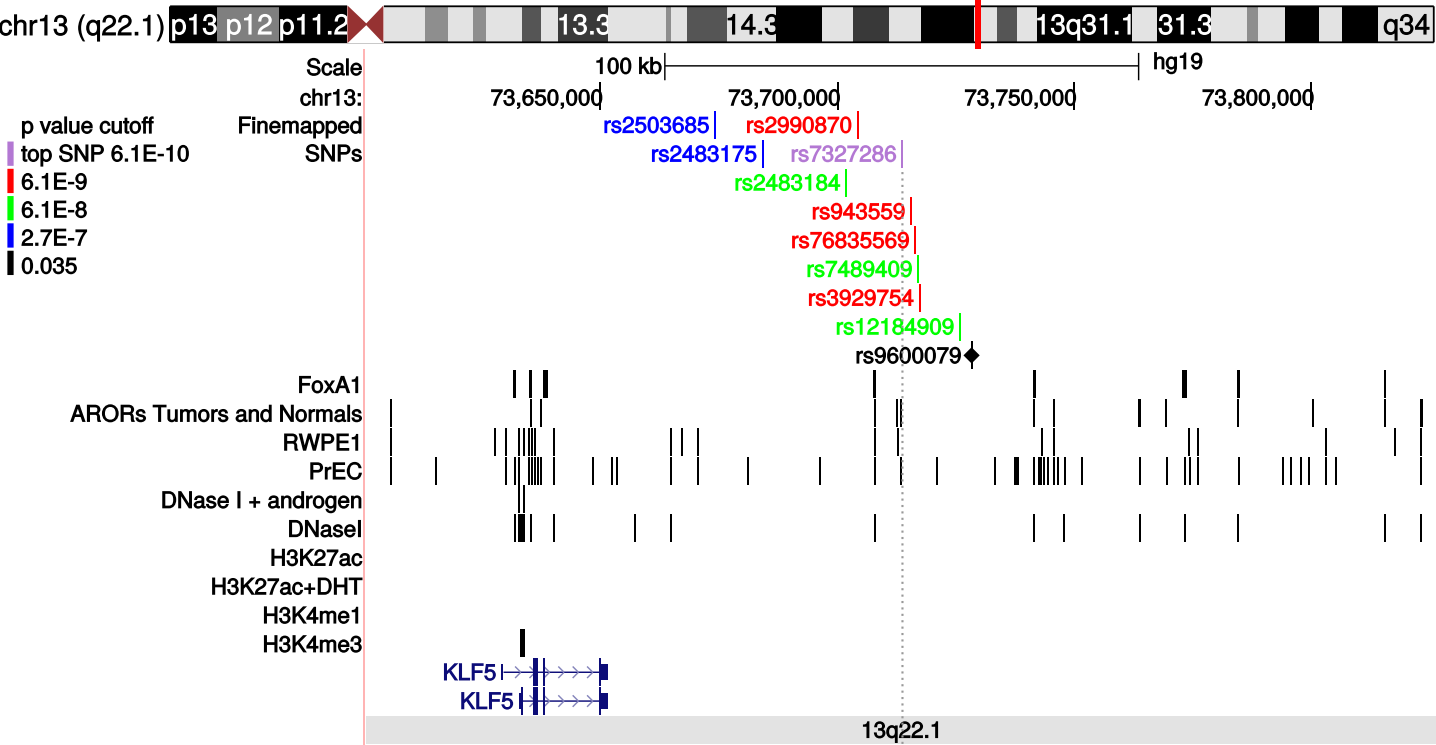

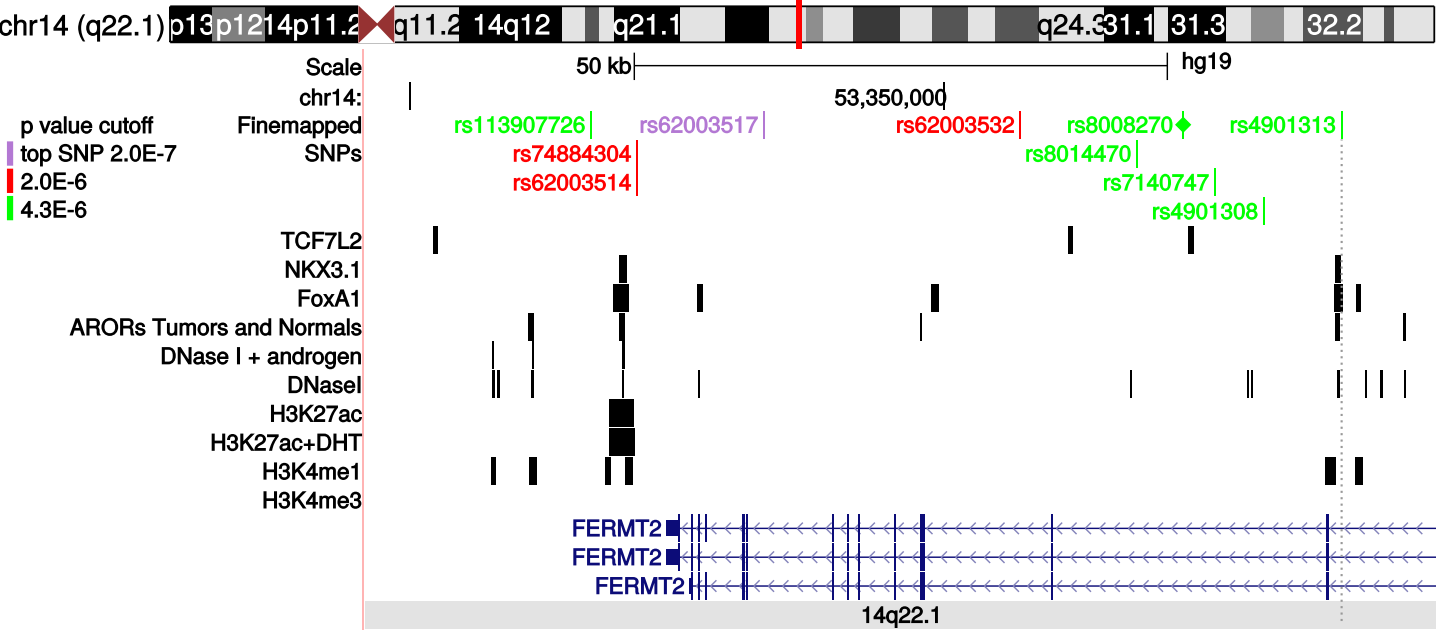

chr17 (p13.3) | 3.313.2p13.1 | 17p12 | 17p11.2 | 17q11.2 | 17q12 | 17q22 | 24.3 | 25.1 | 17q25.3

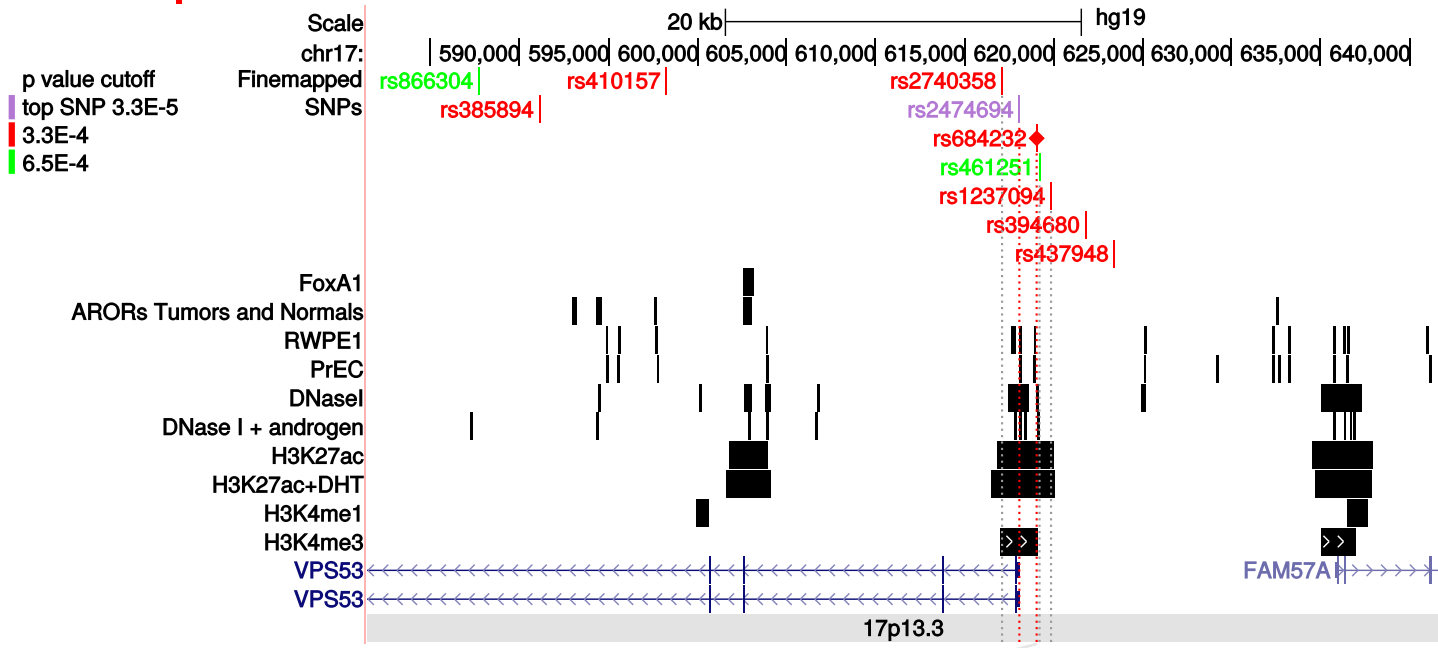

response elements:

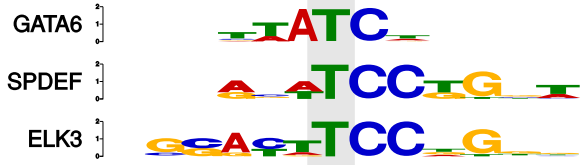

genomic sequence:

**GAATATCCGGGA**

variant:

rs684232: C/T OR:1.07

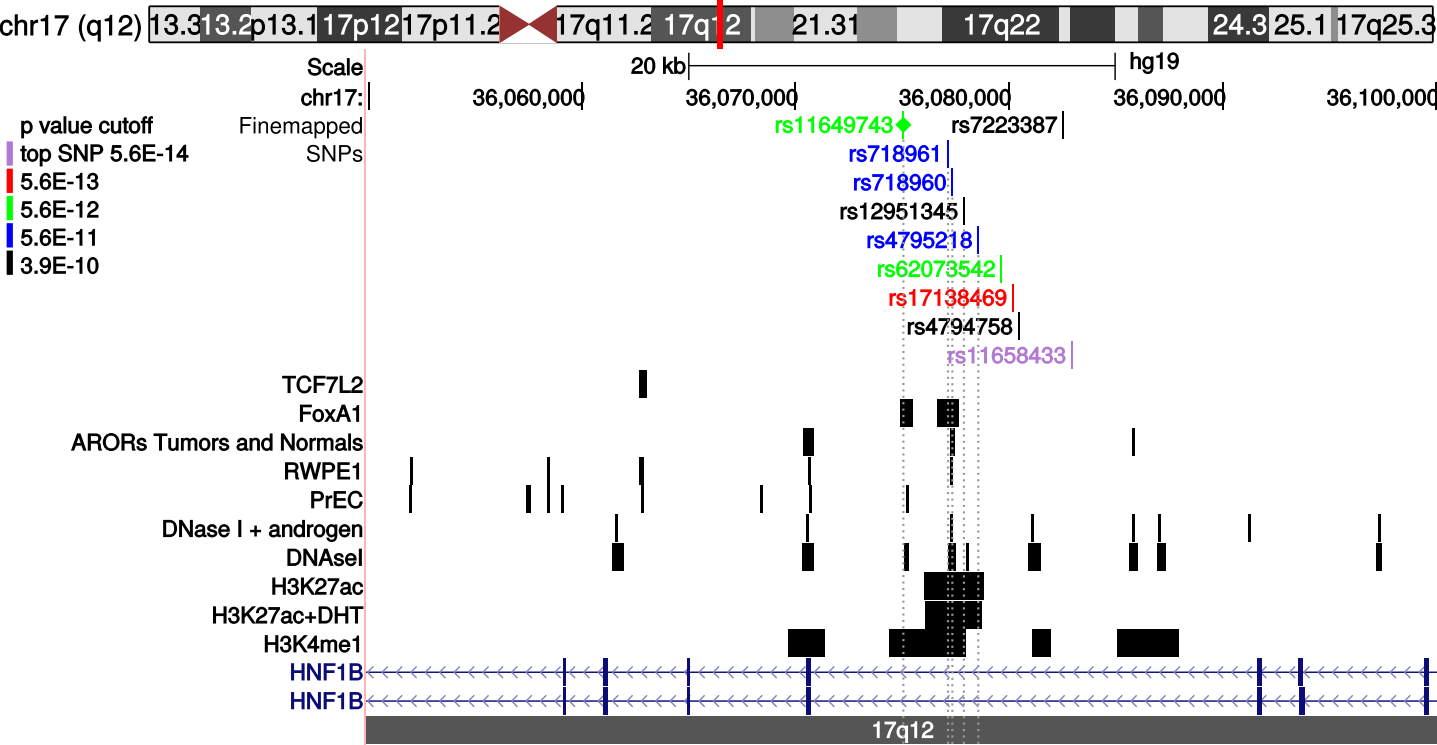

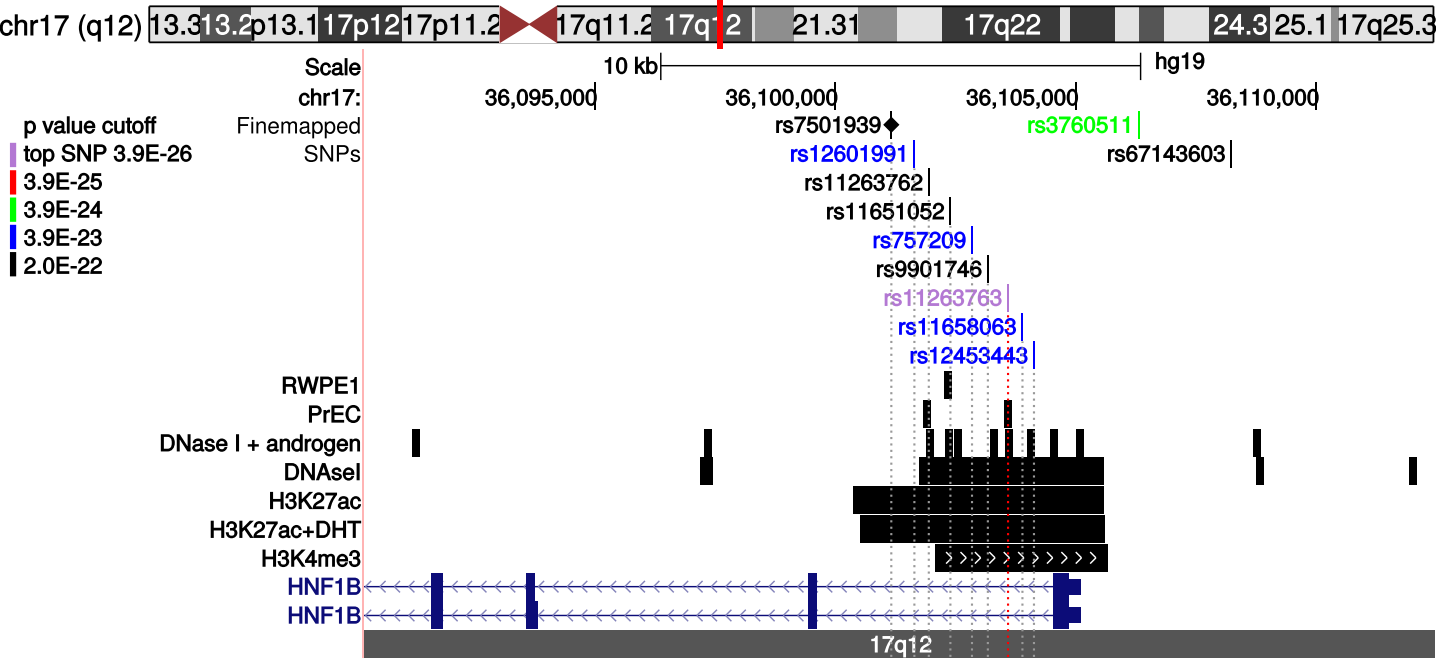

chr17 (q21.32-q21.33) 13.117p12 p11.2 q11.2 17q12 17q22 17q23 24.325.1 q25.3

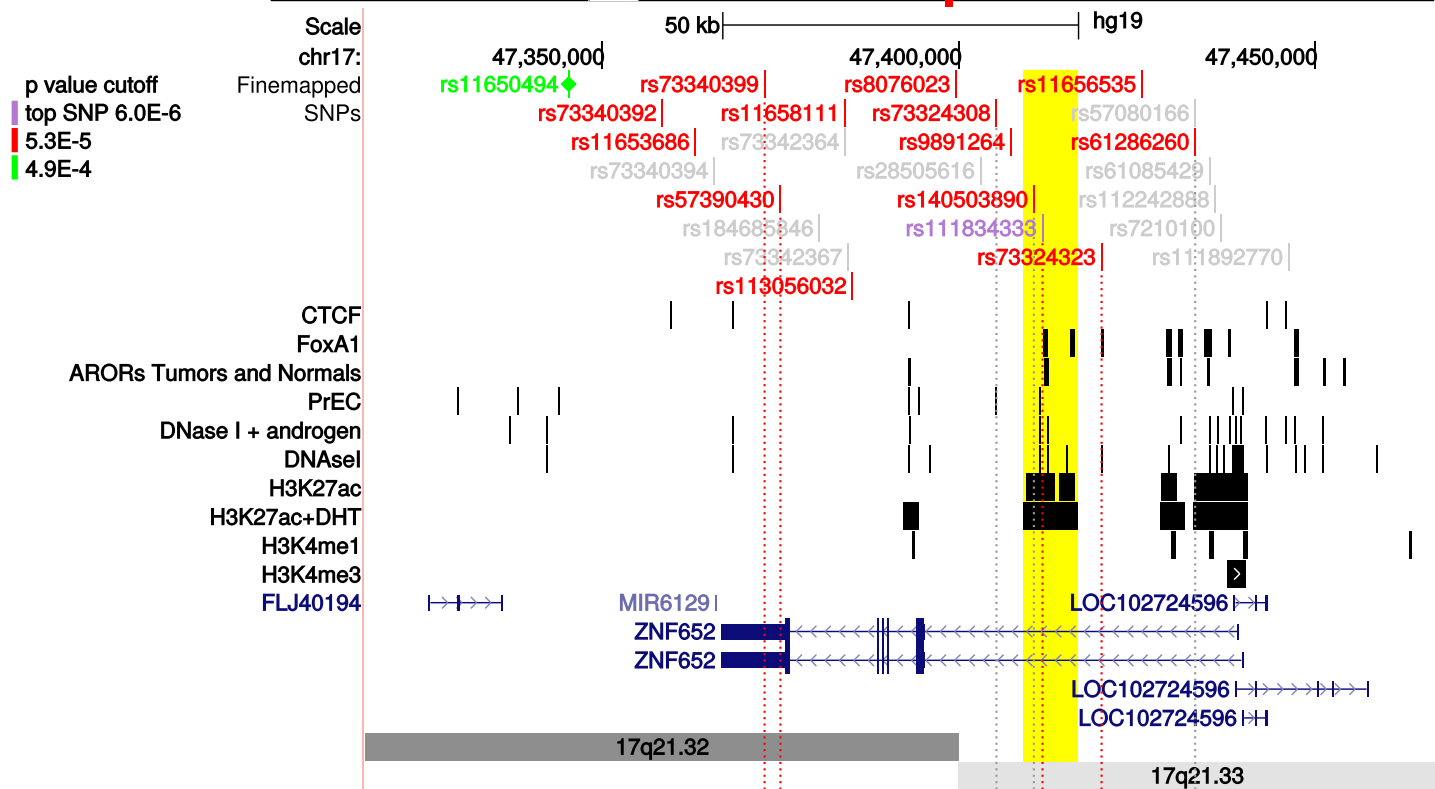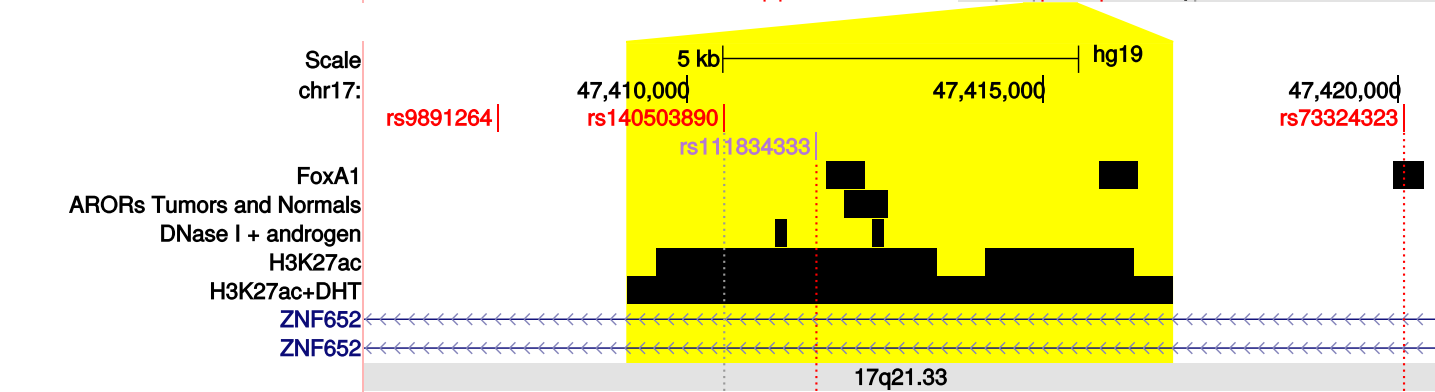

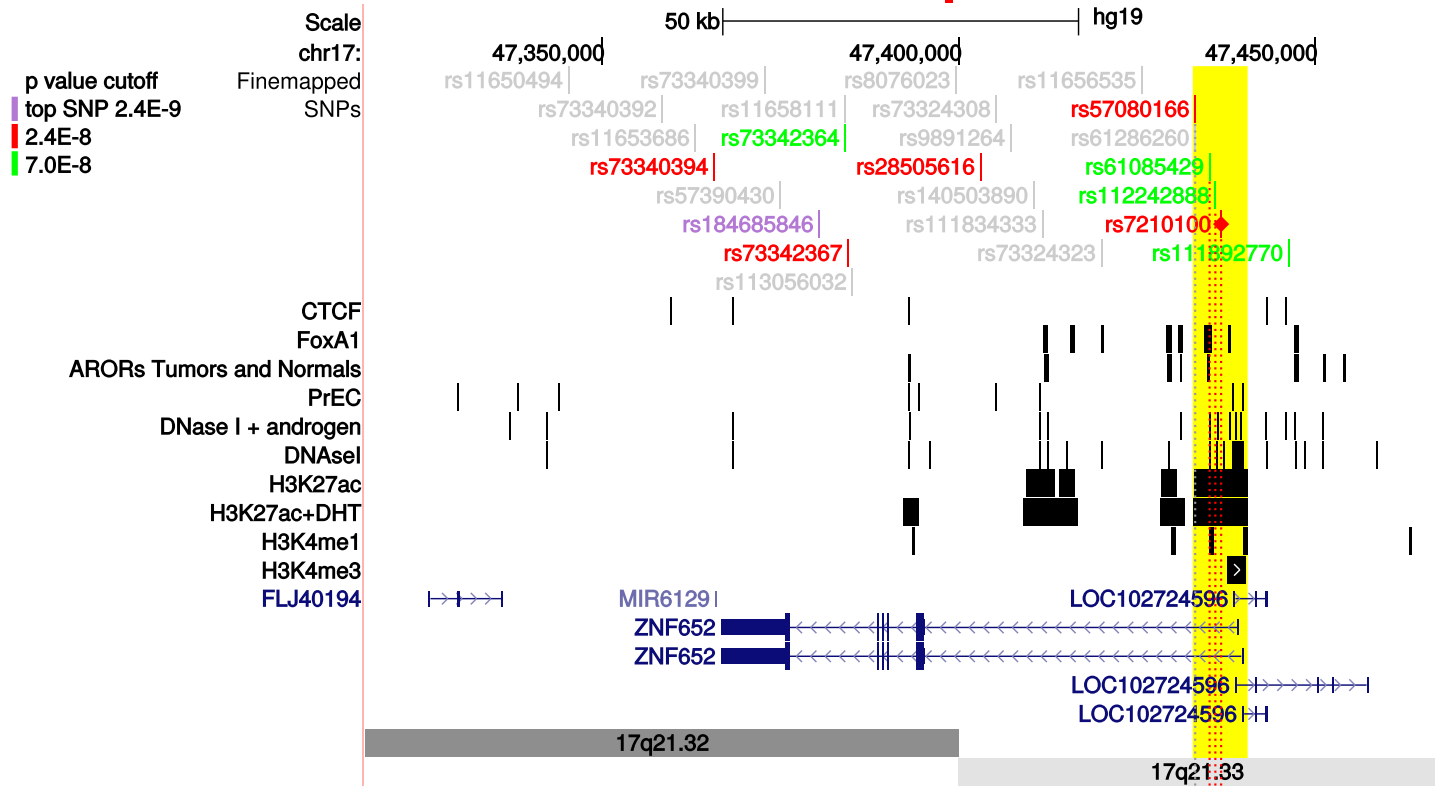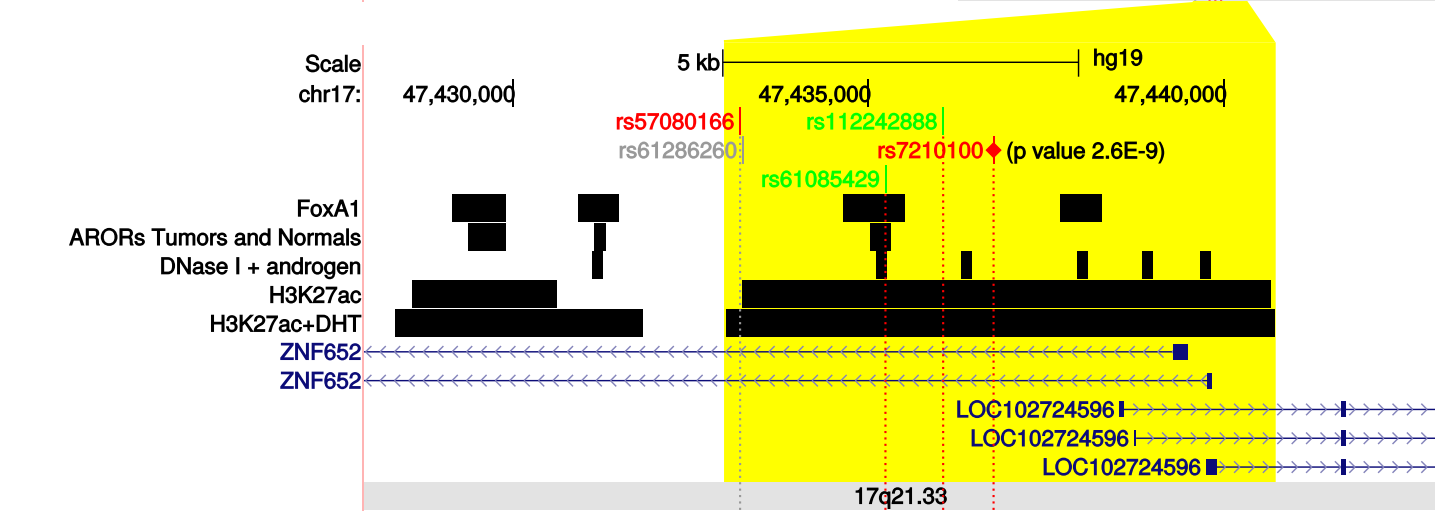

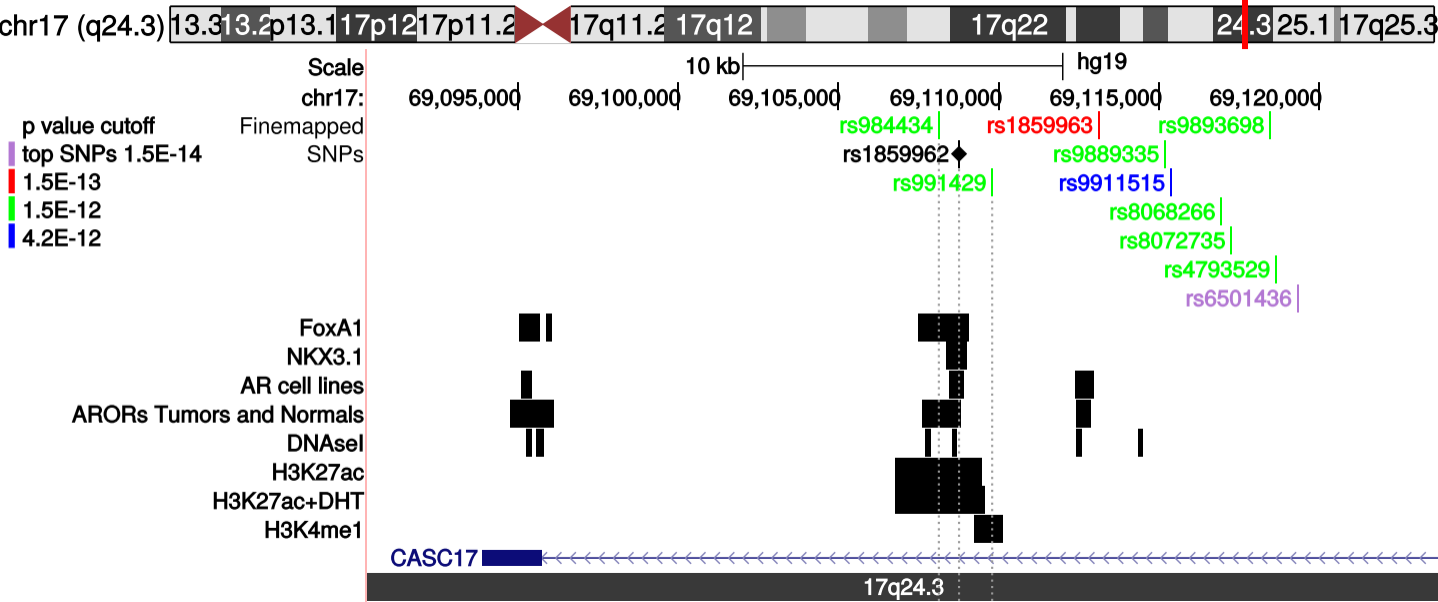



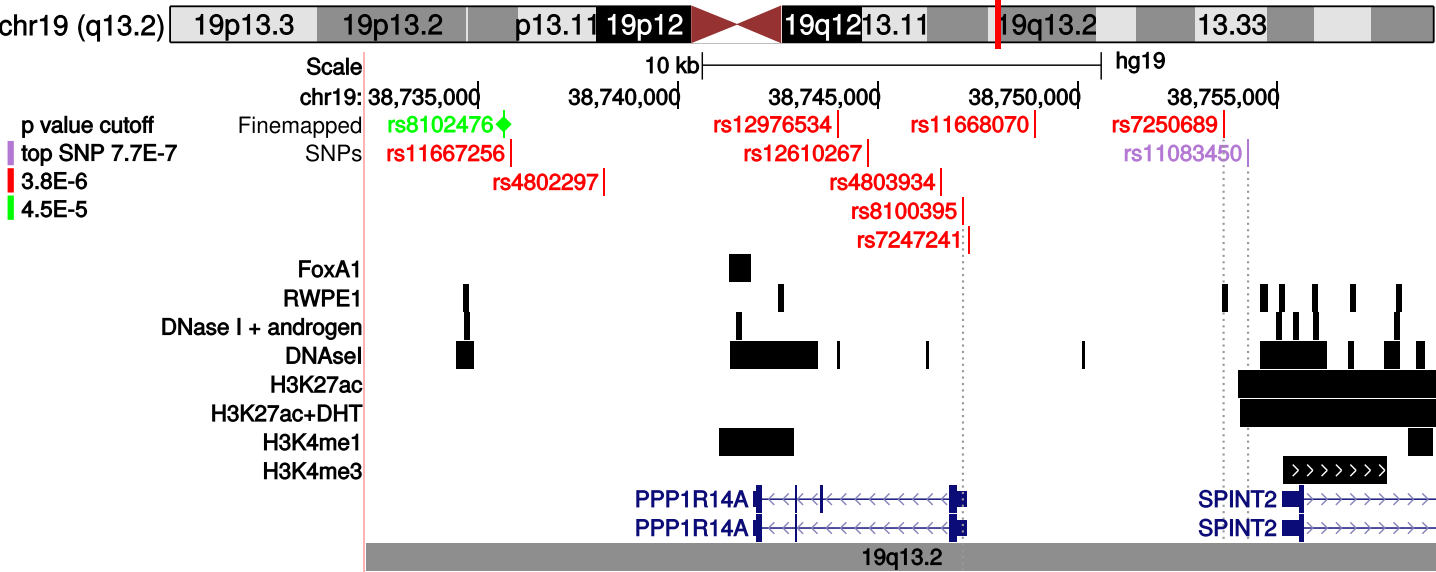

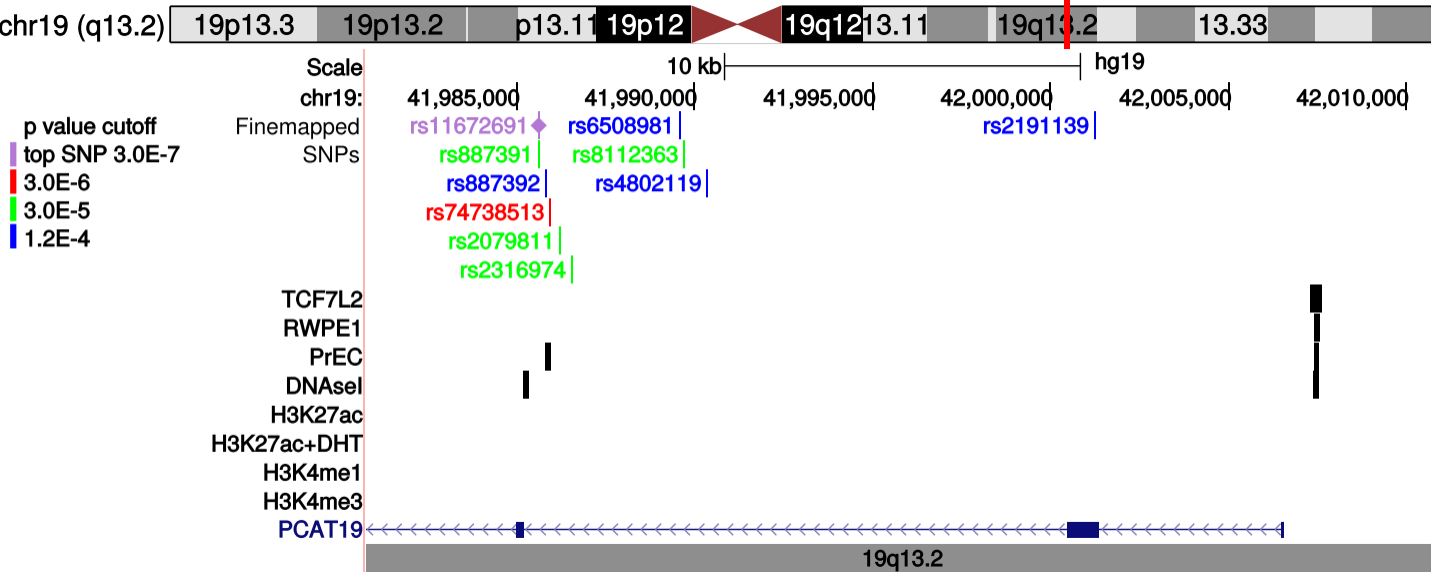



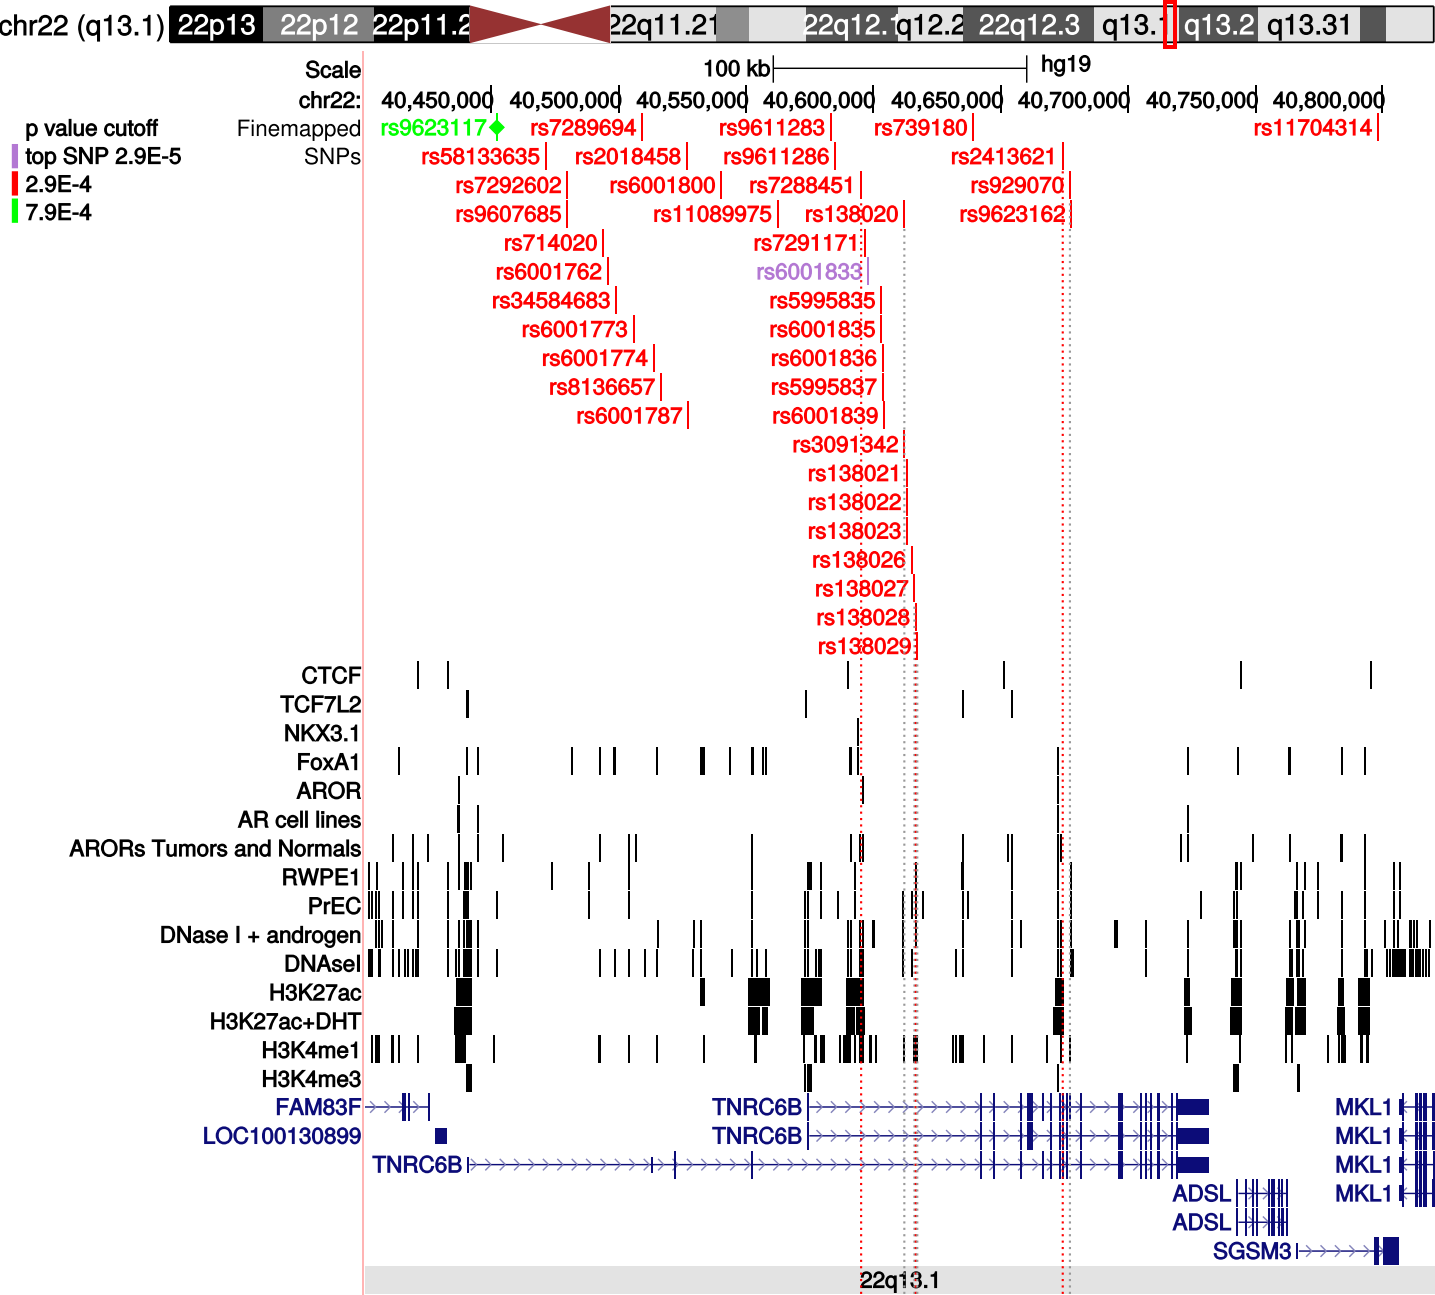

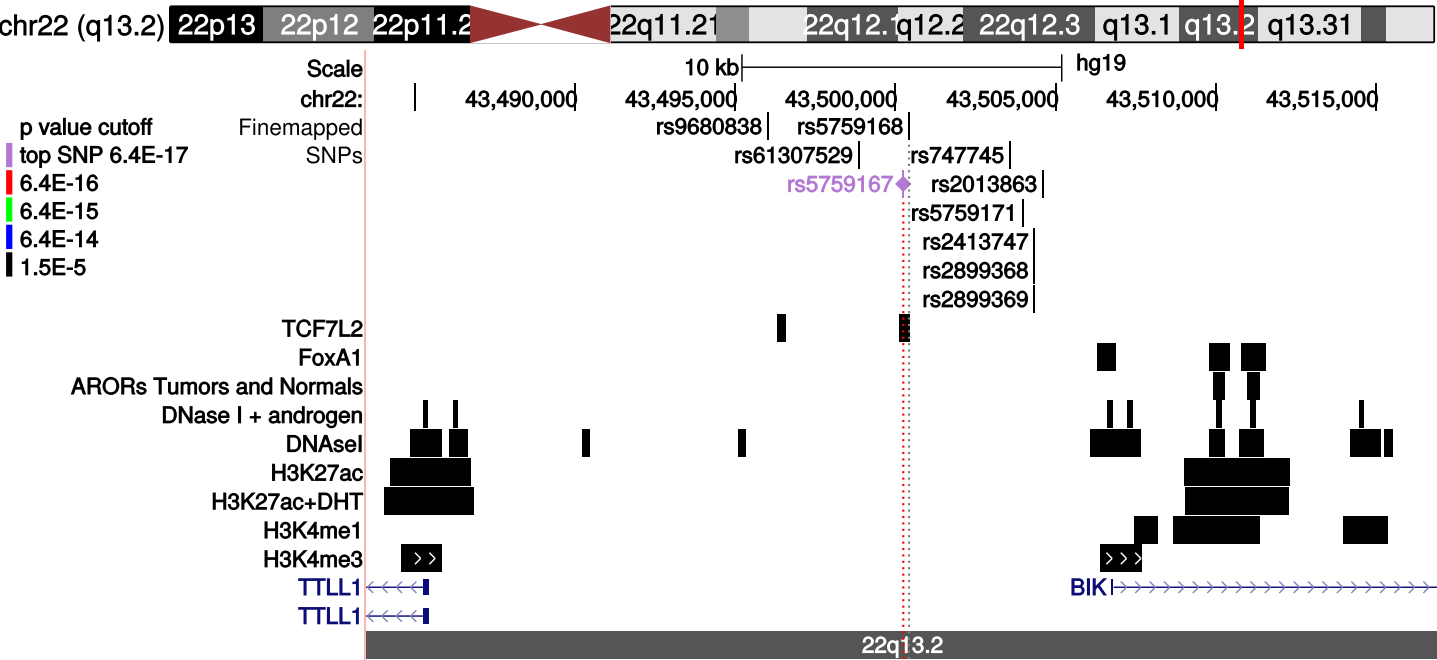

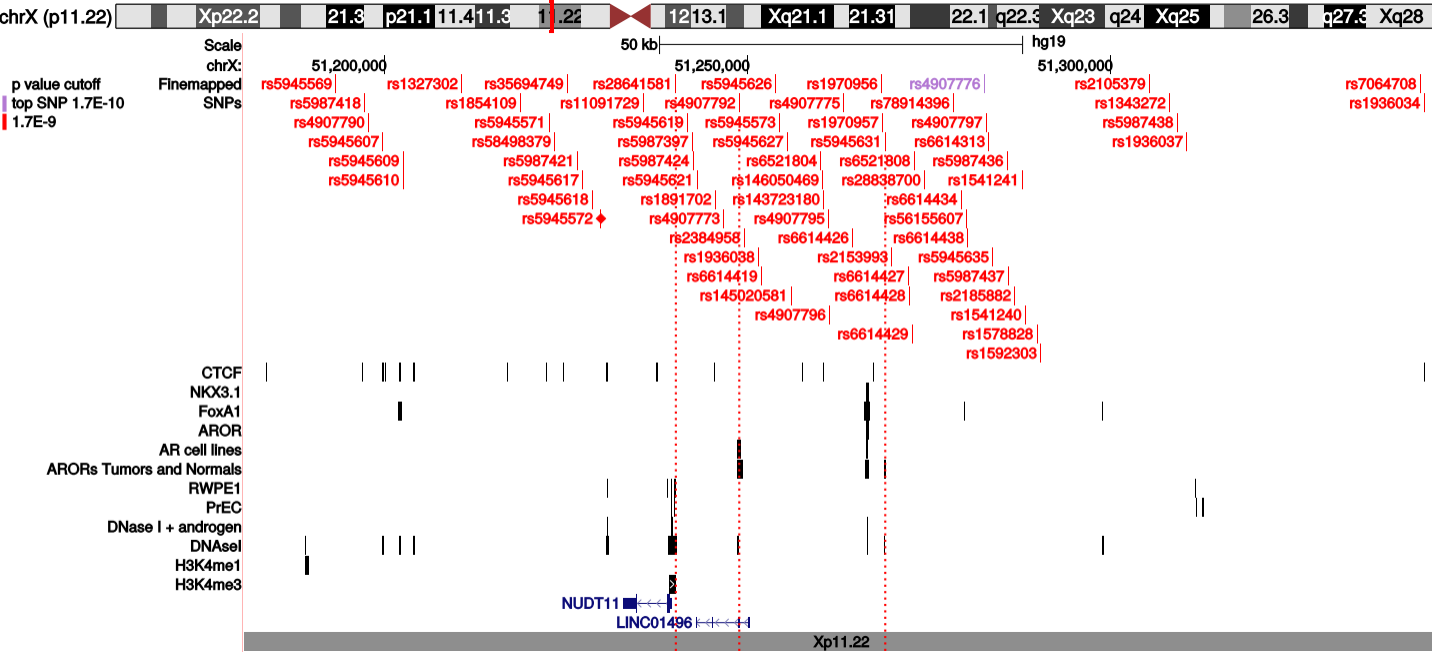

Supplement: supp_ddv269_ddv269supp_fig4.pdf [file supp_ddv269_ddv269supp_fig4.pdf]
