# Supplementary material
Source: PubMed Central journal article supplement (PMC4572069)

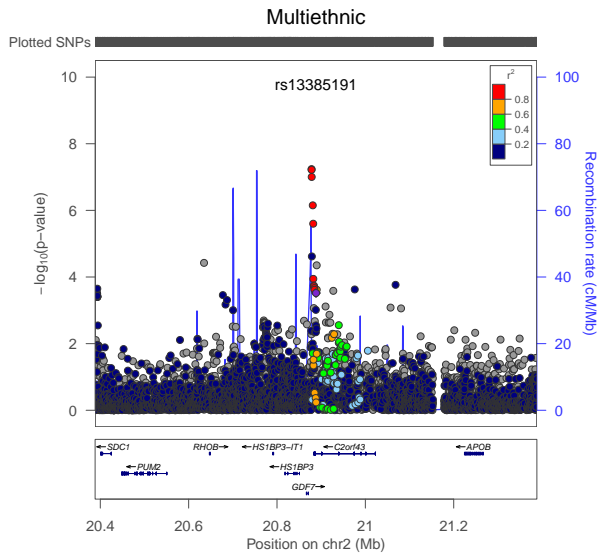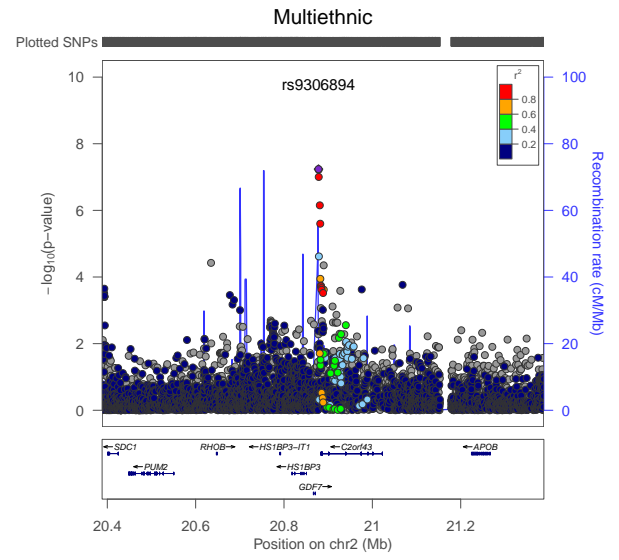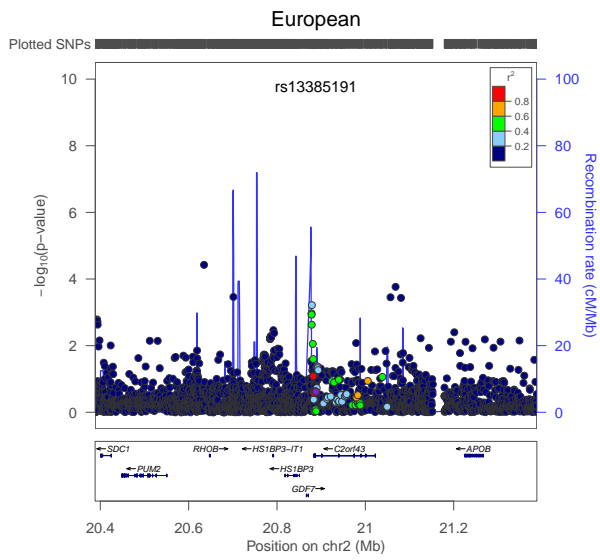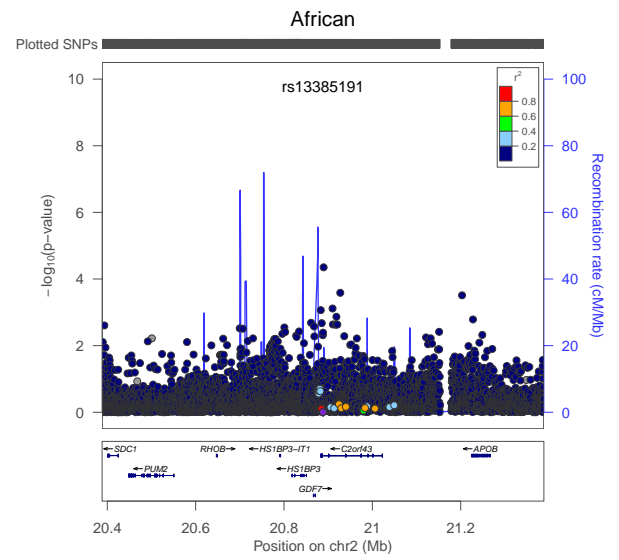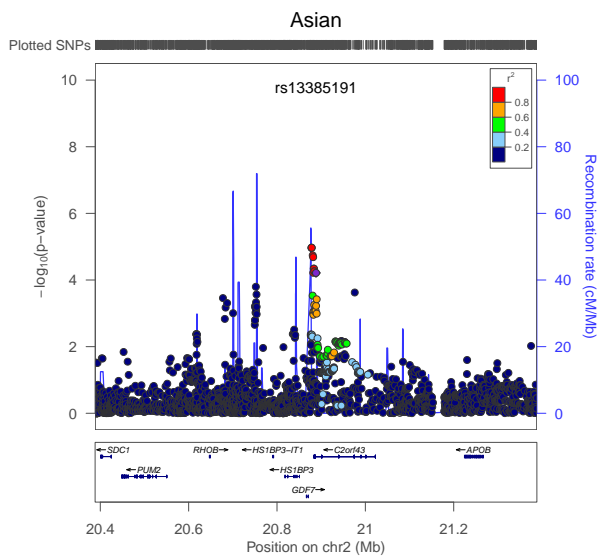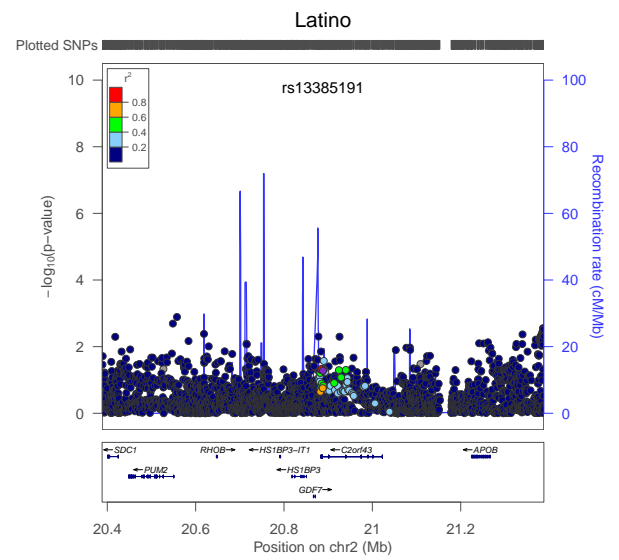

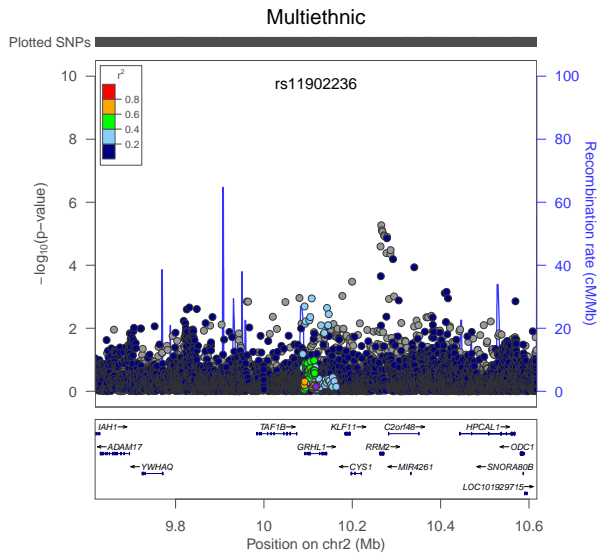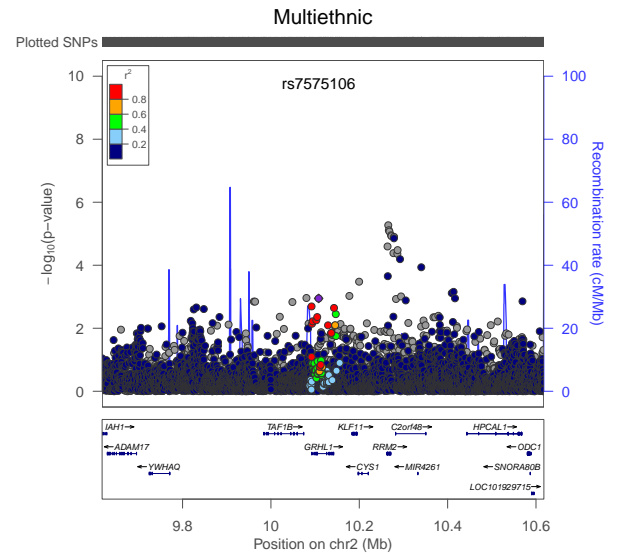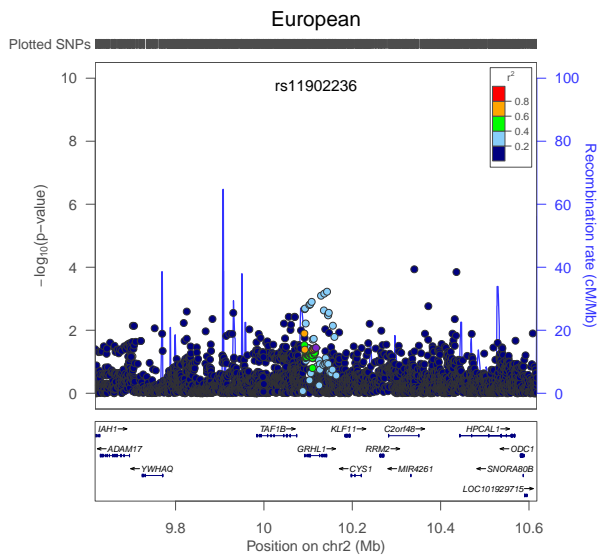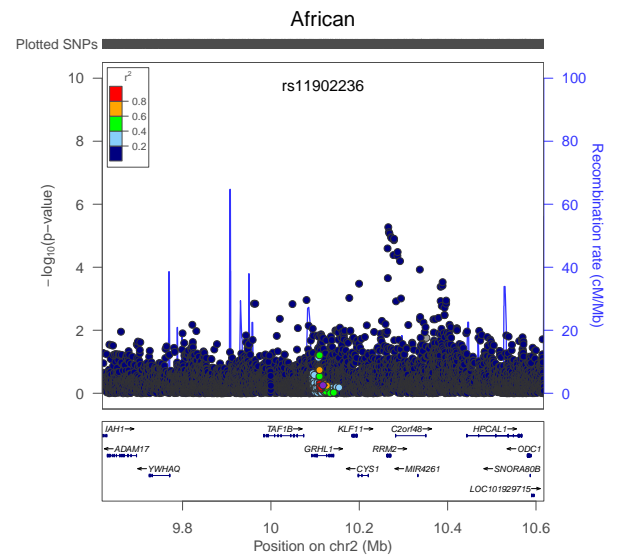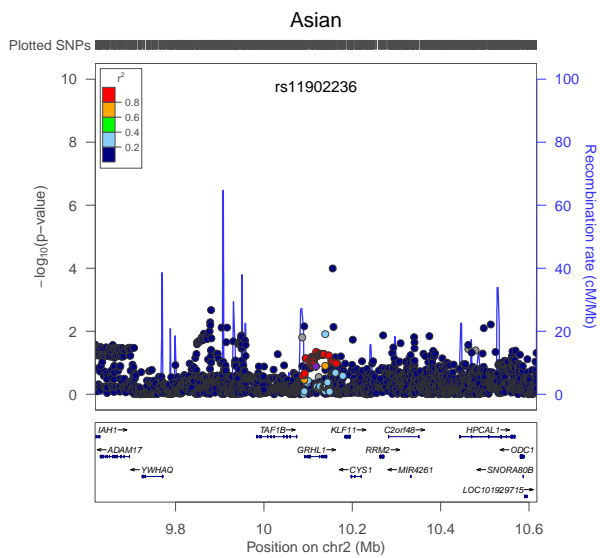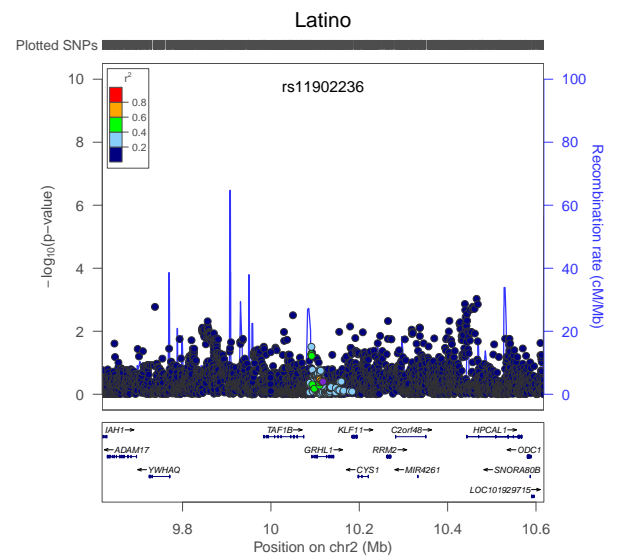

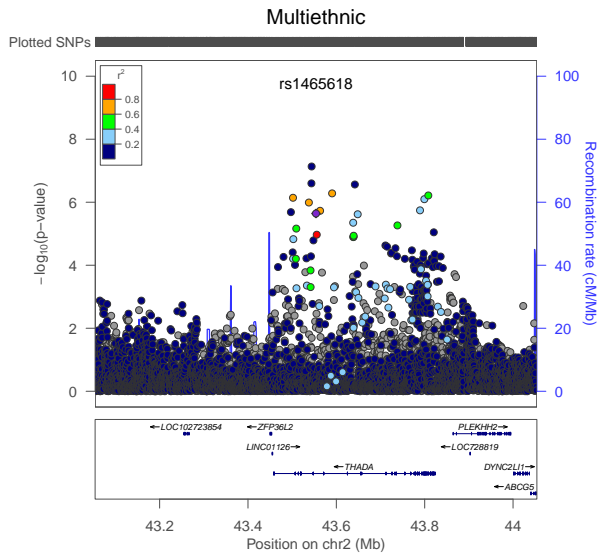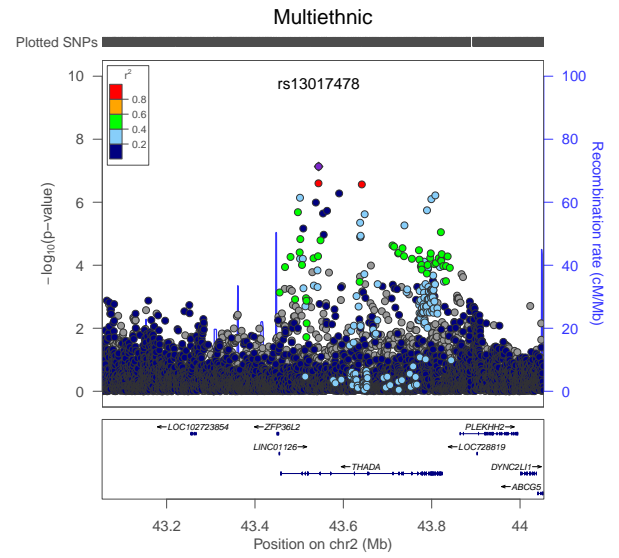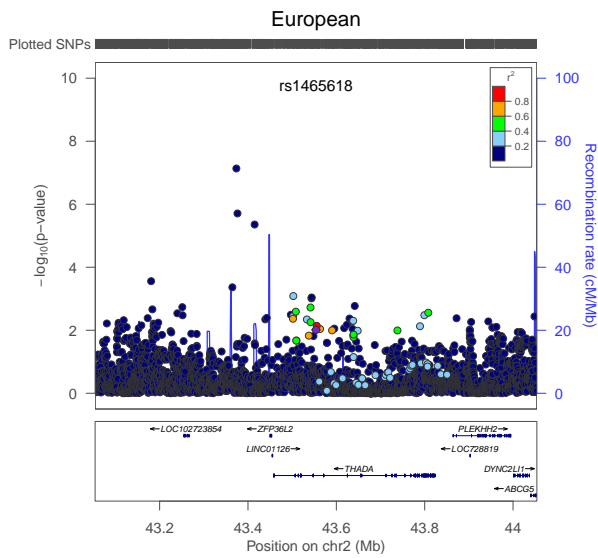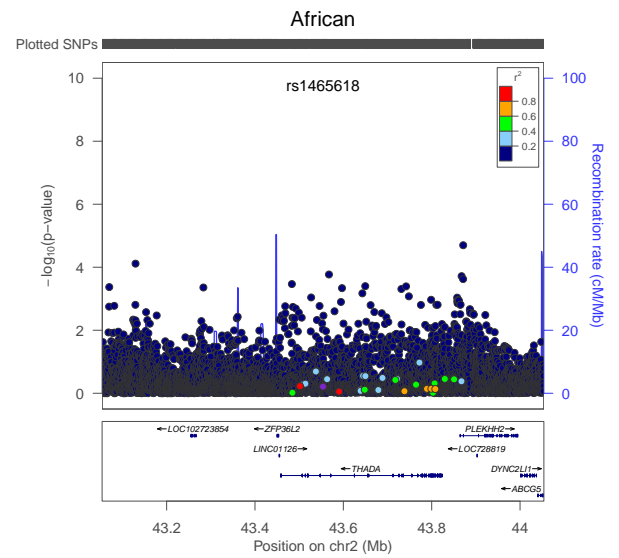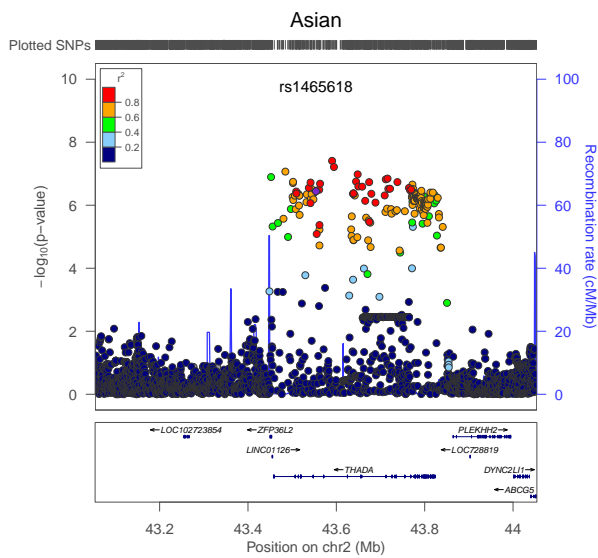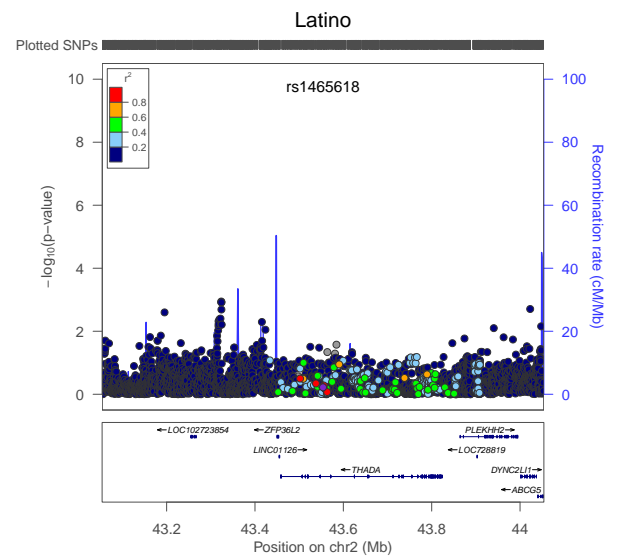

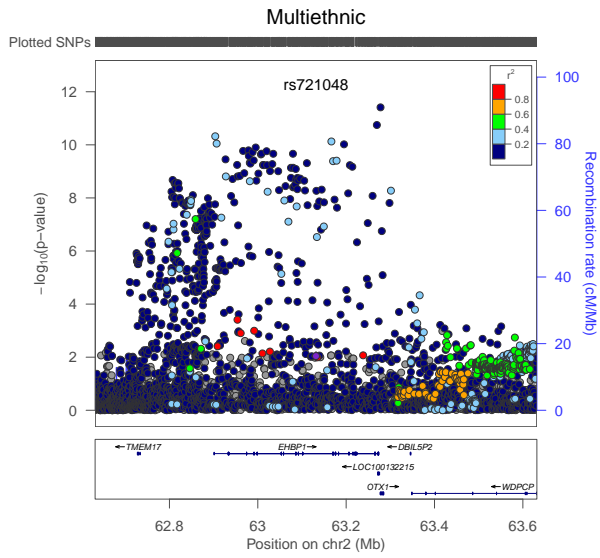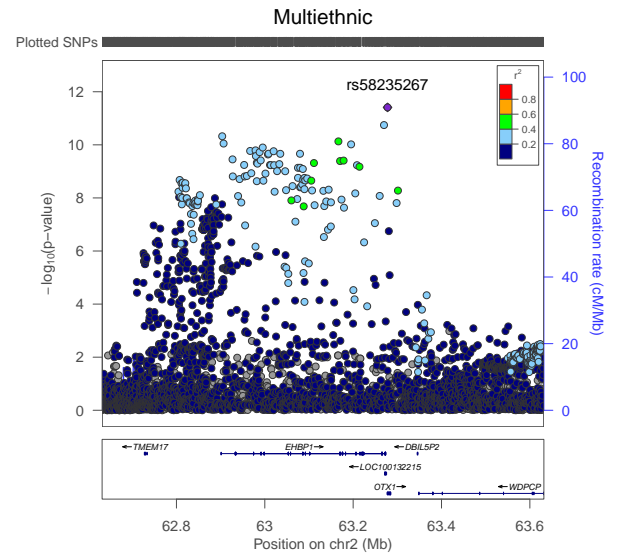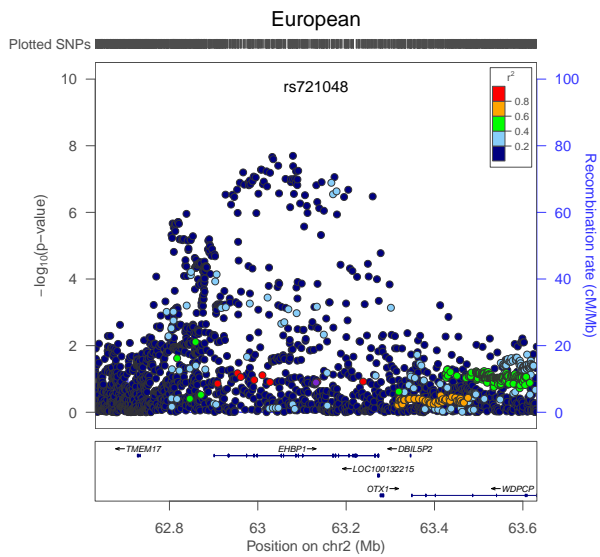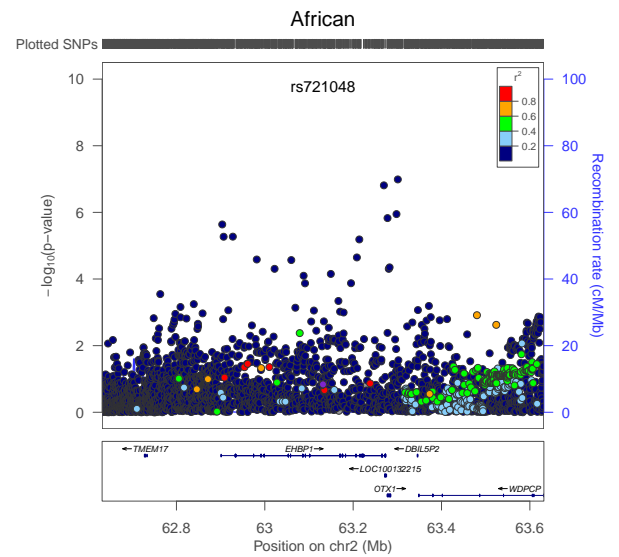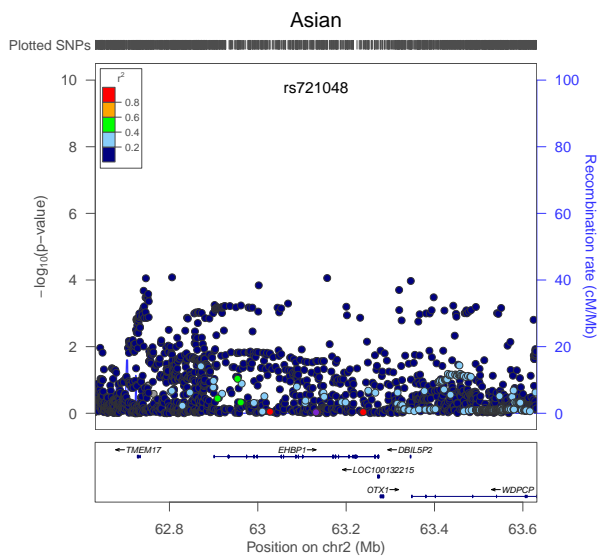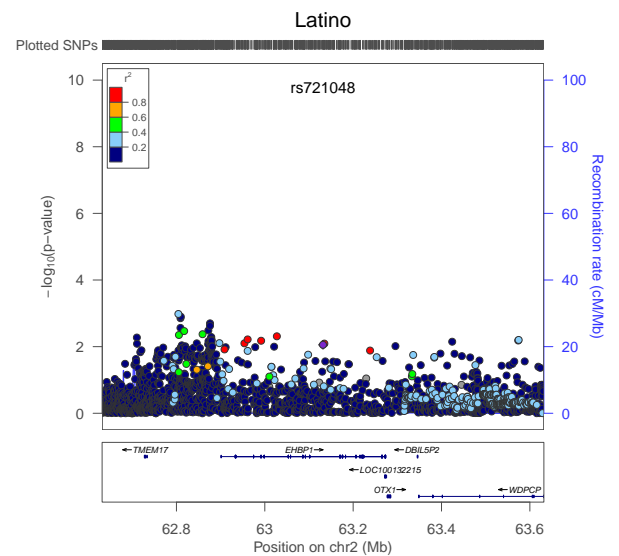

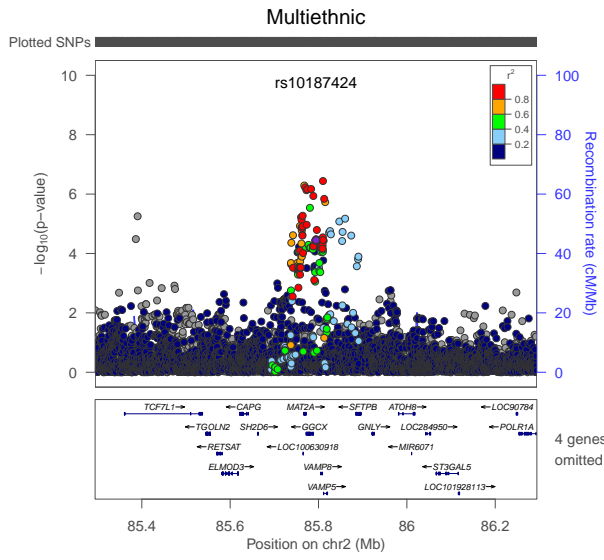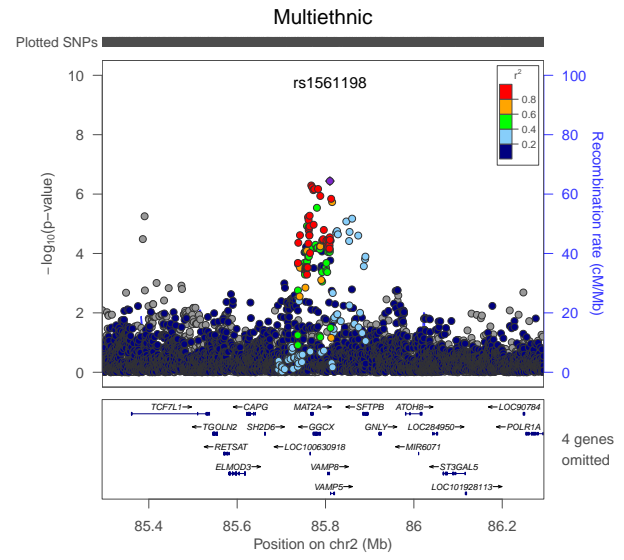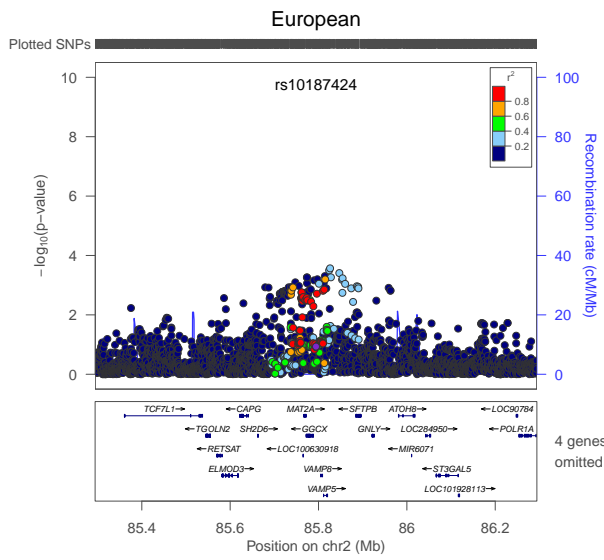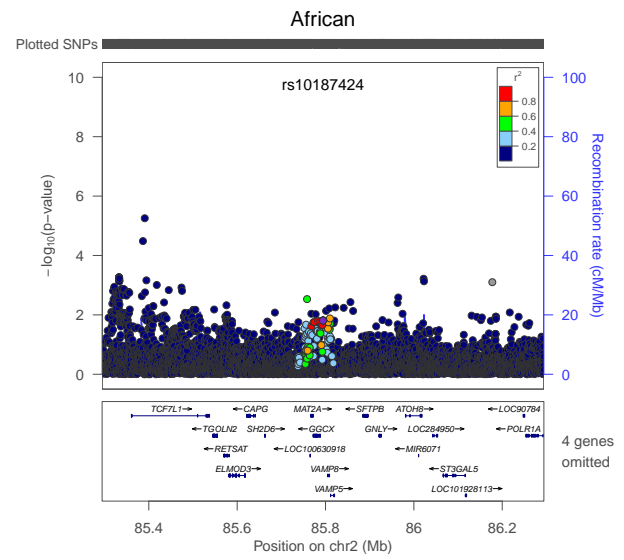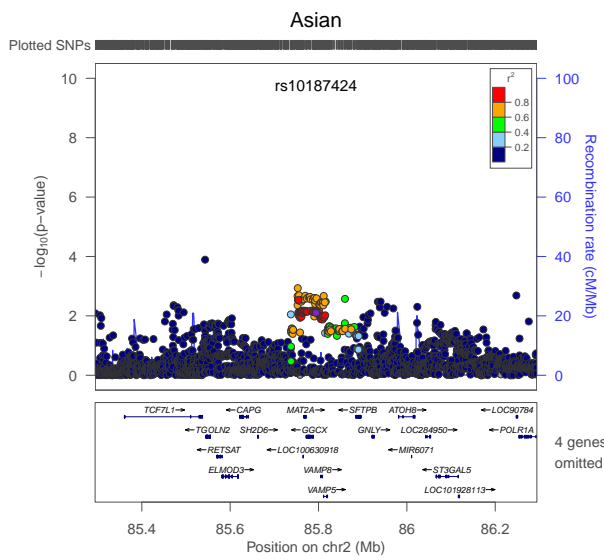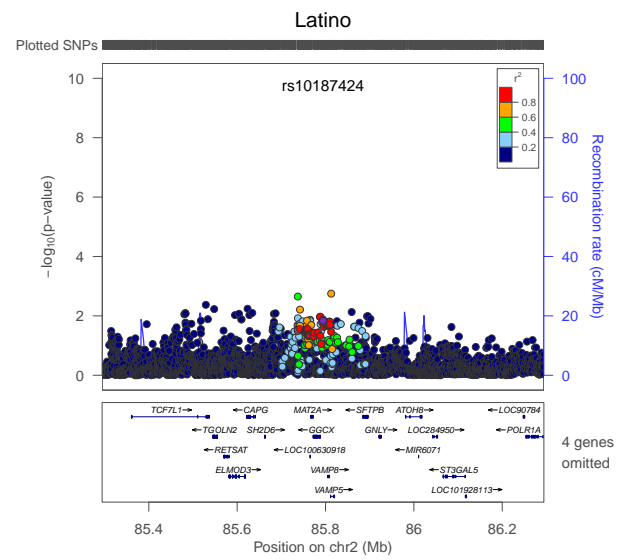

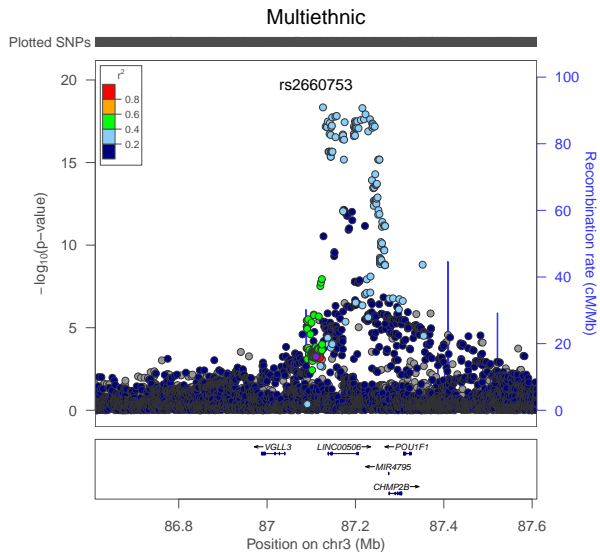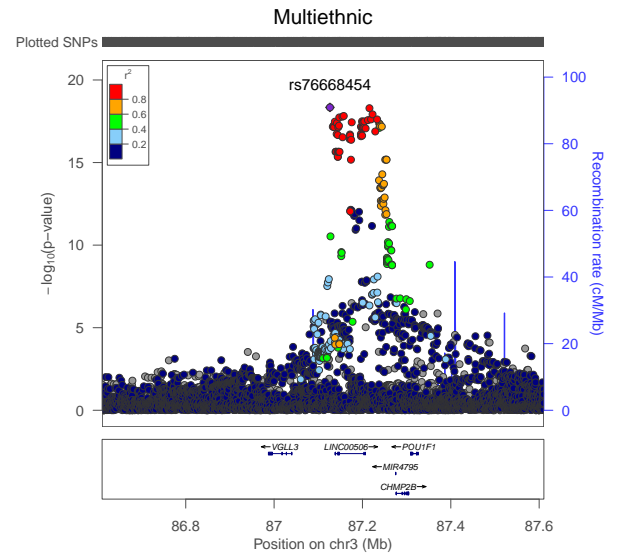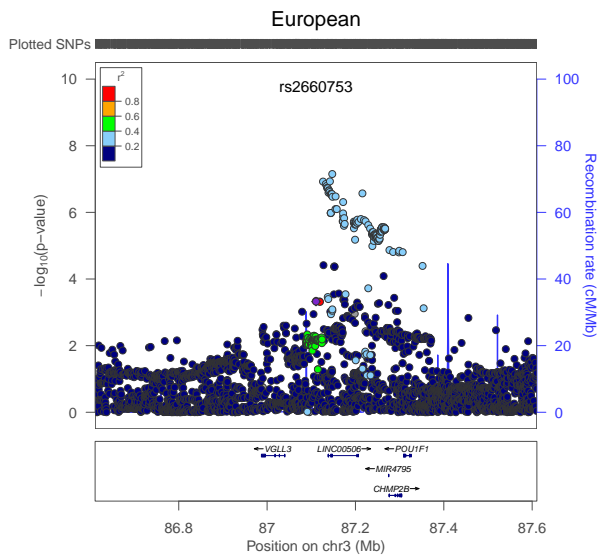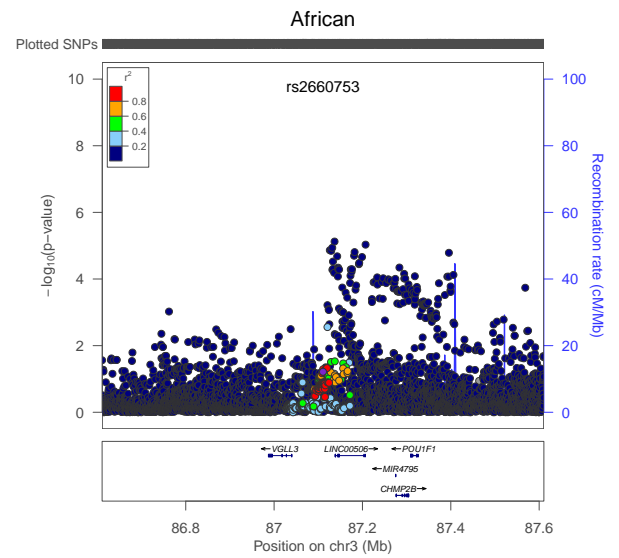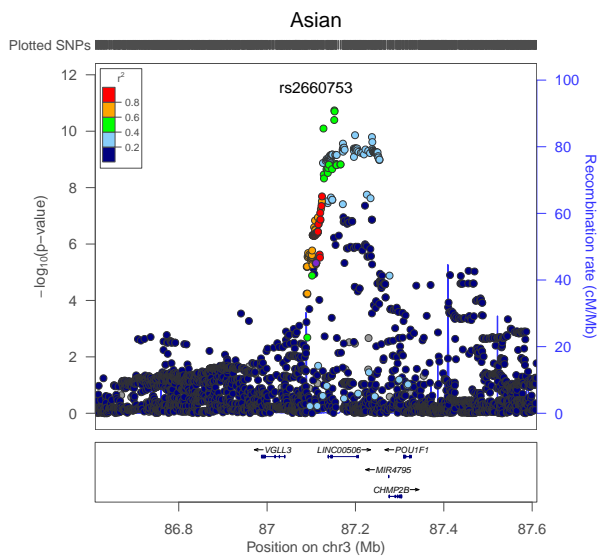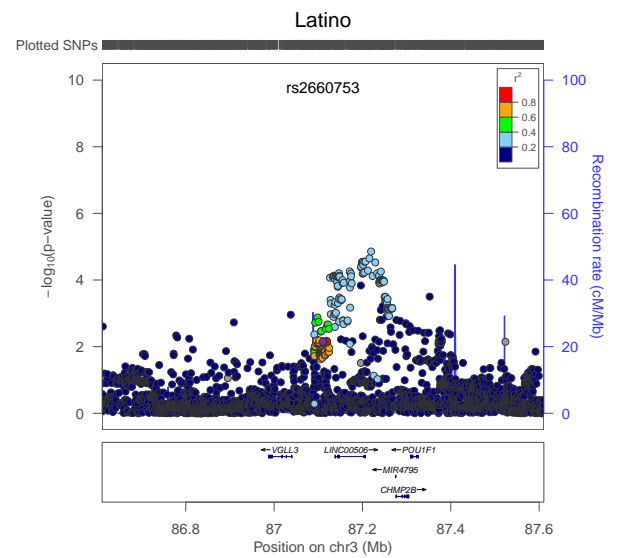

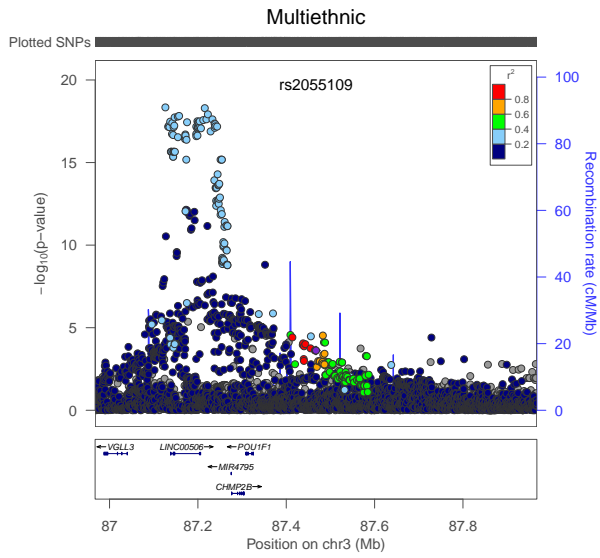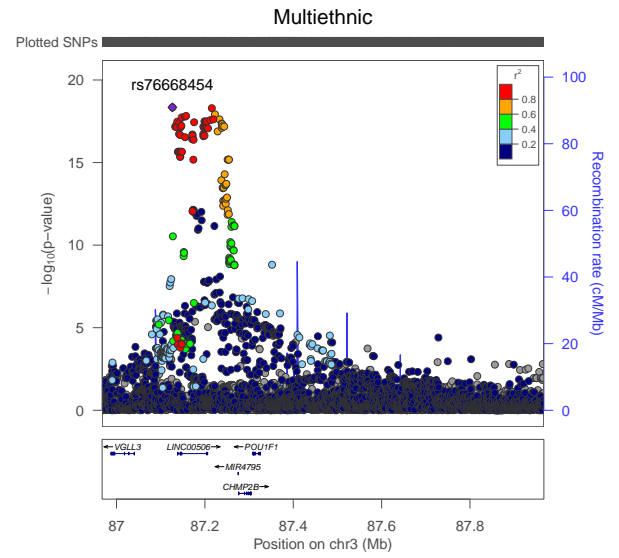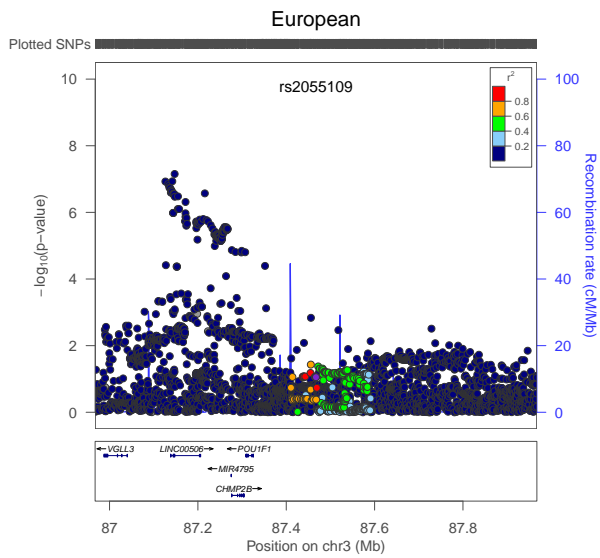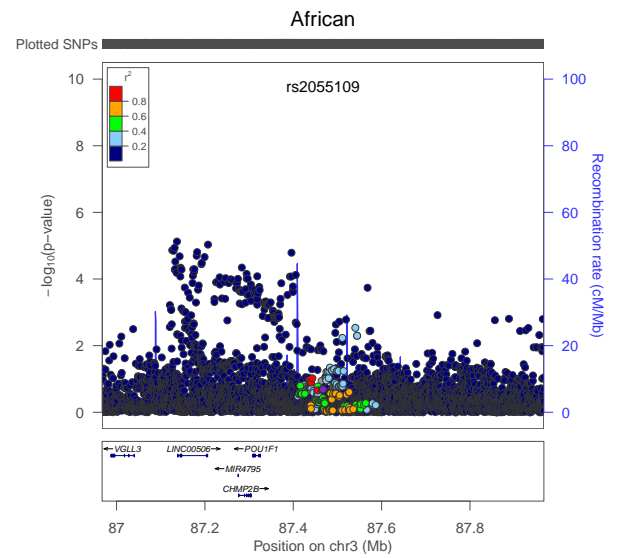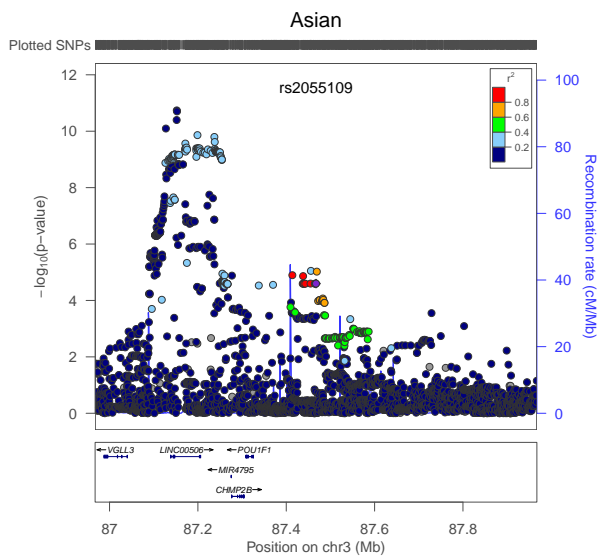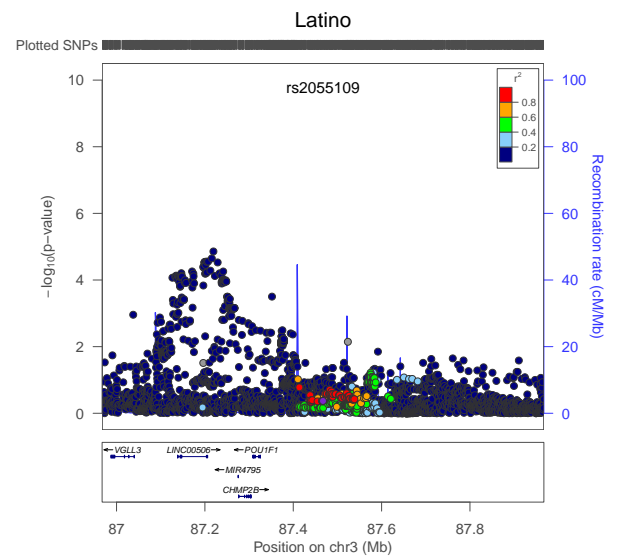

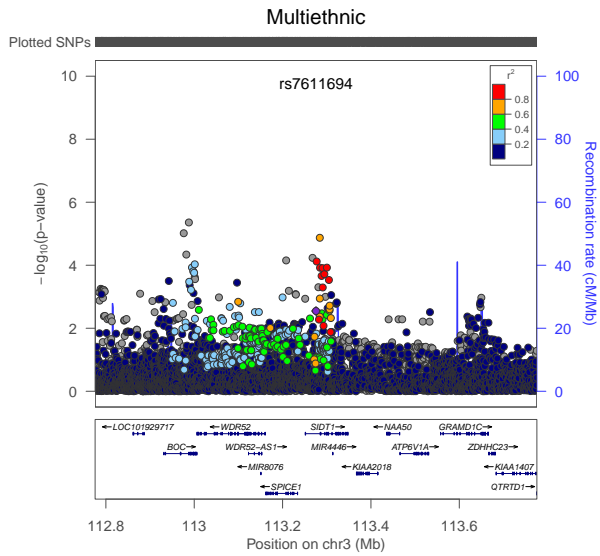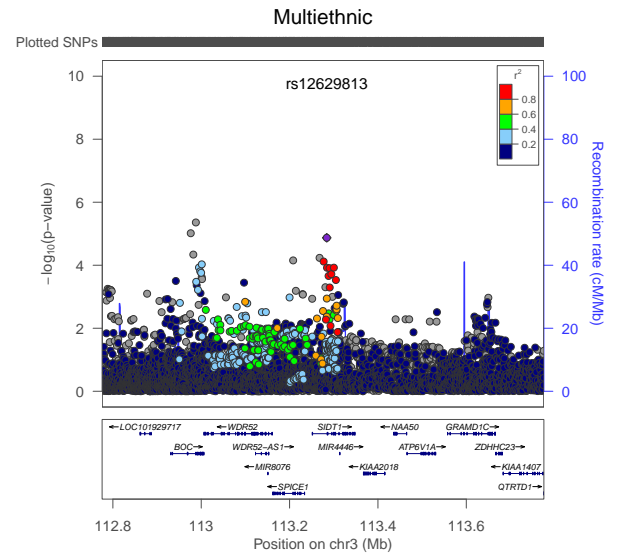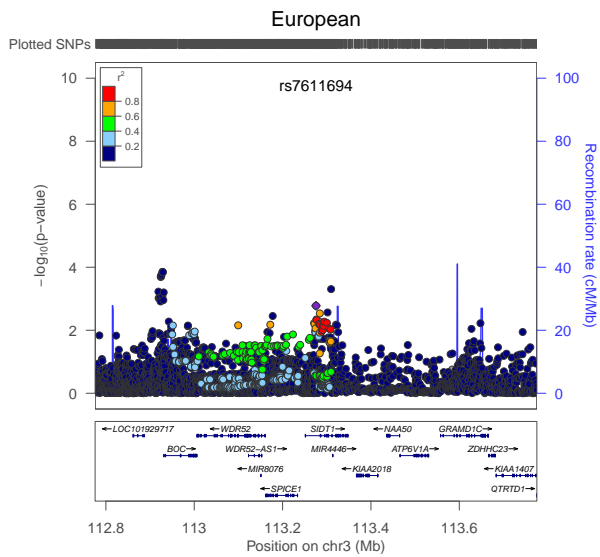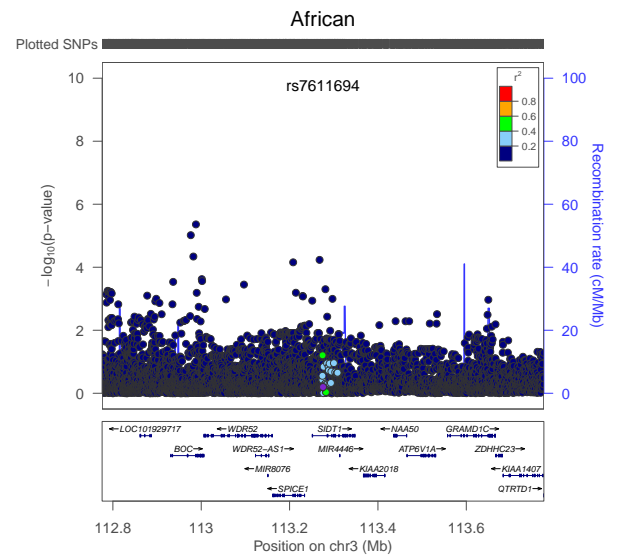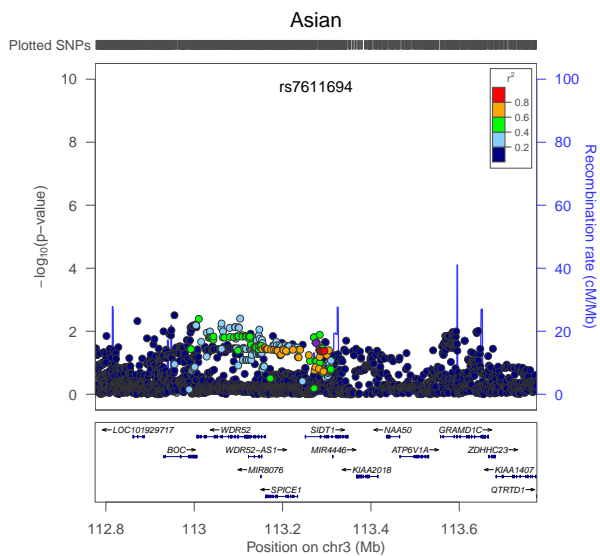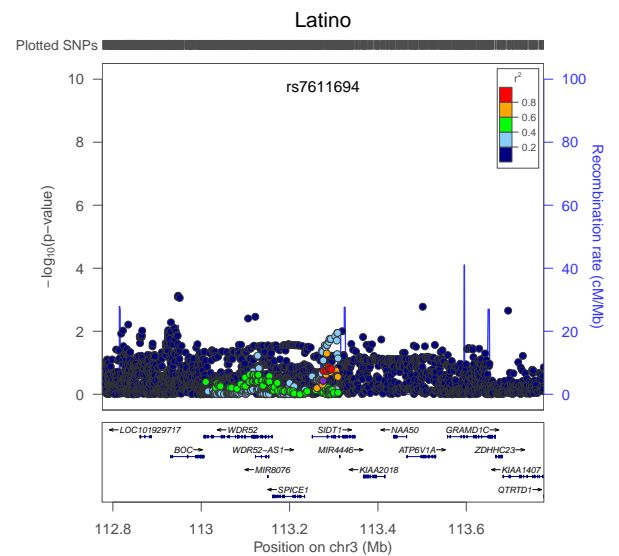



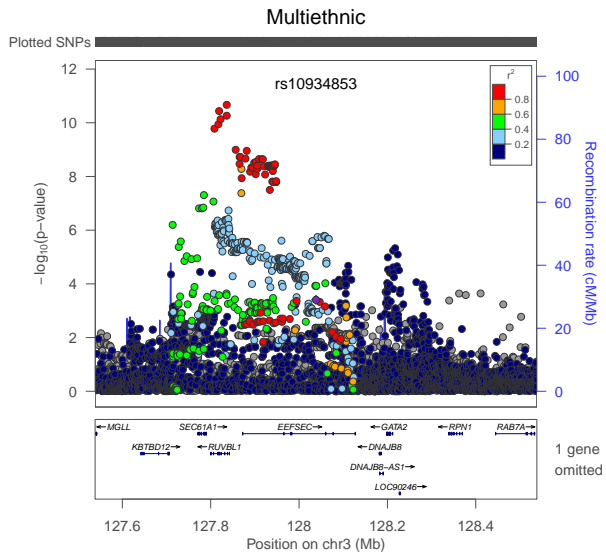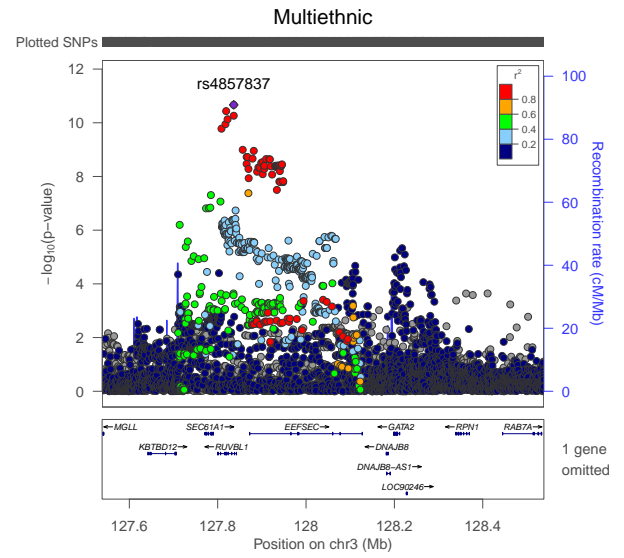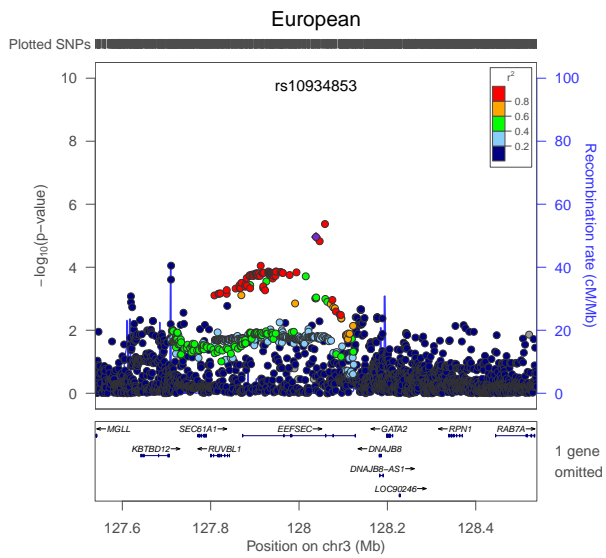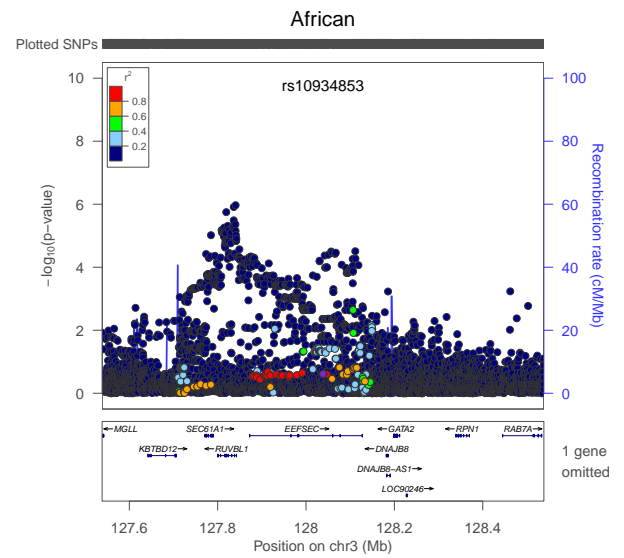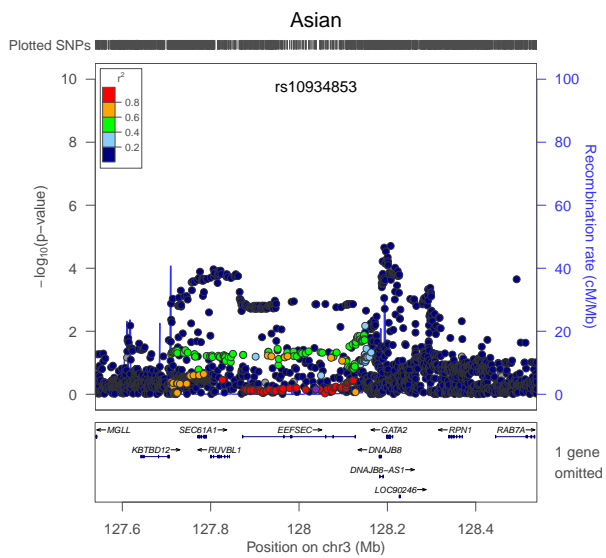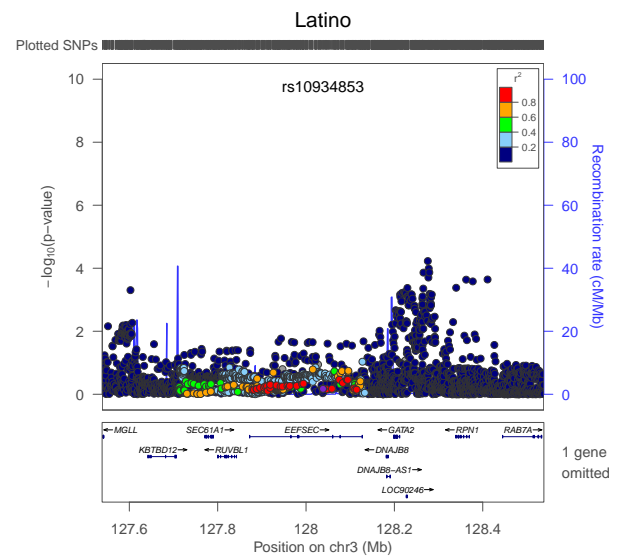

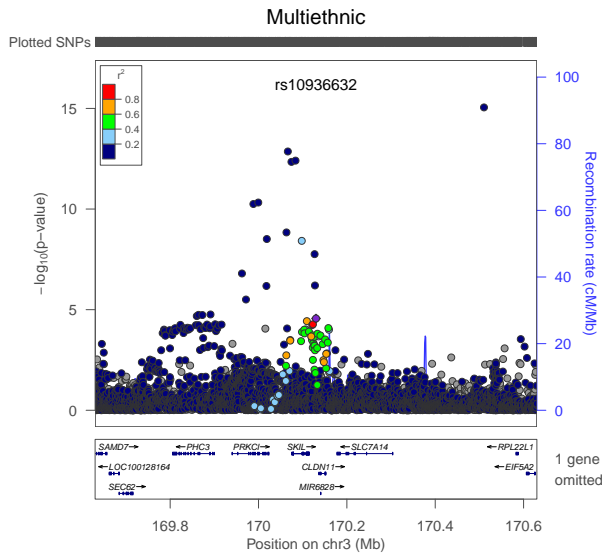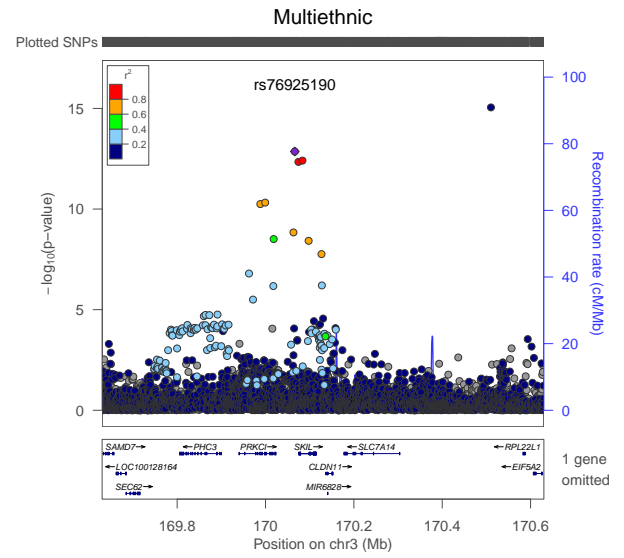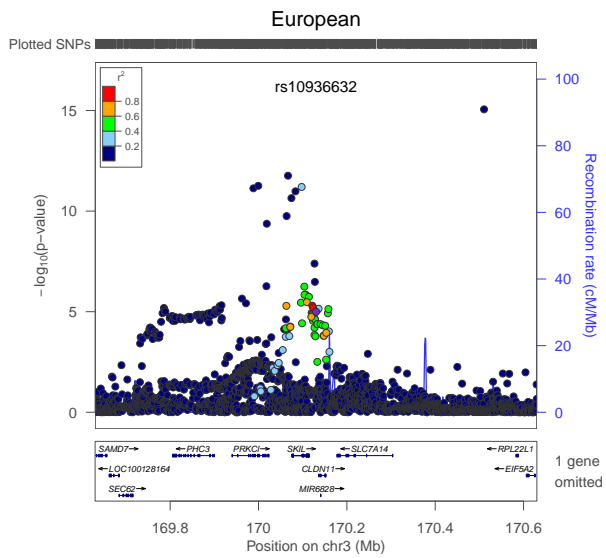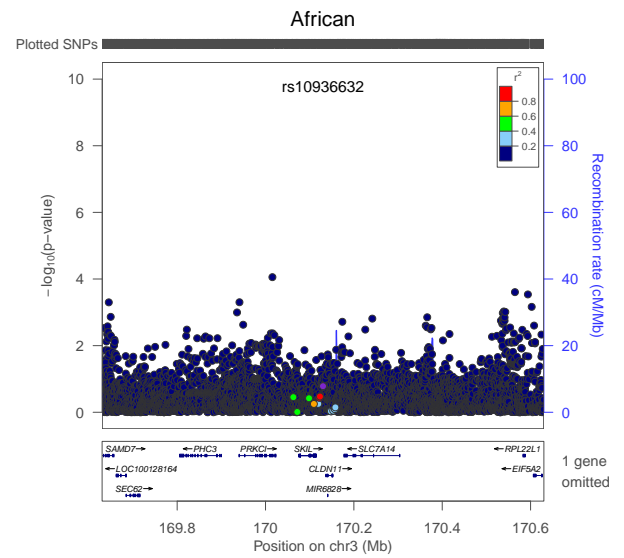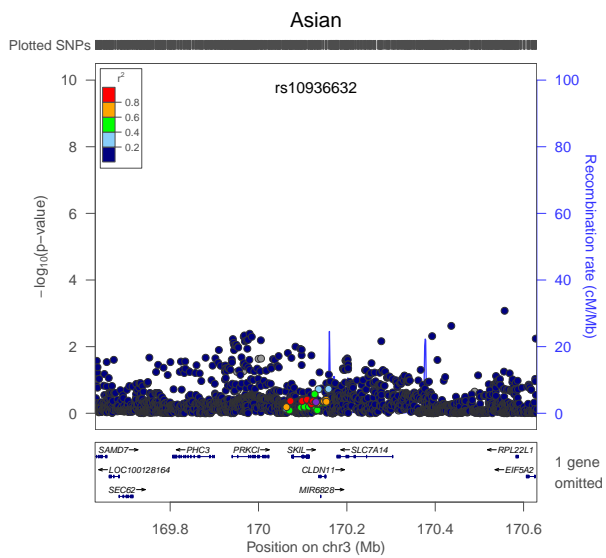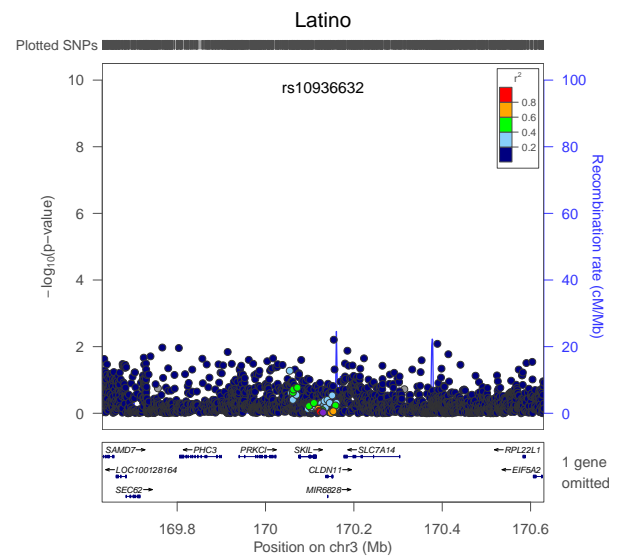

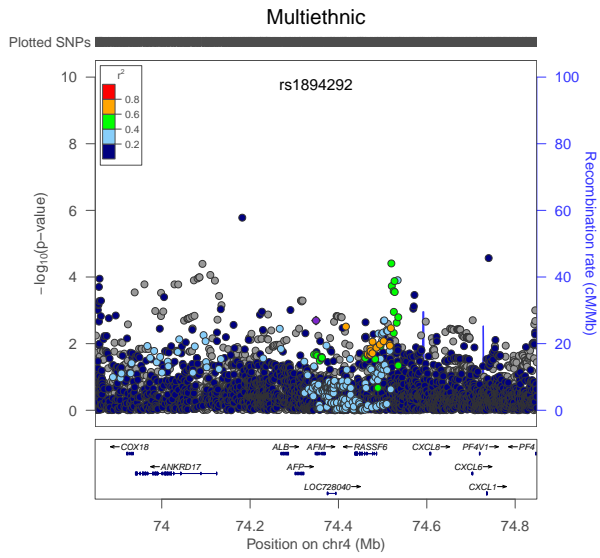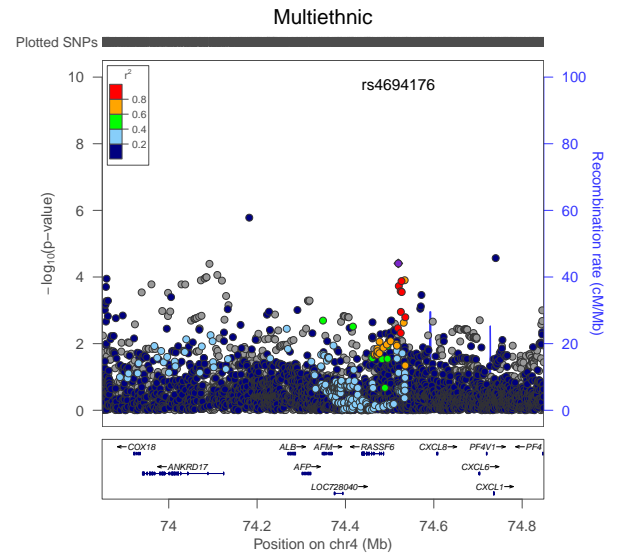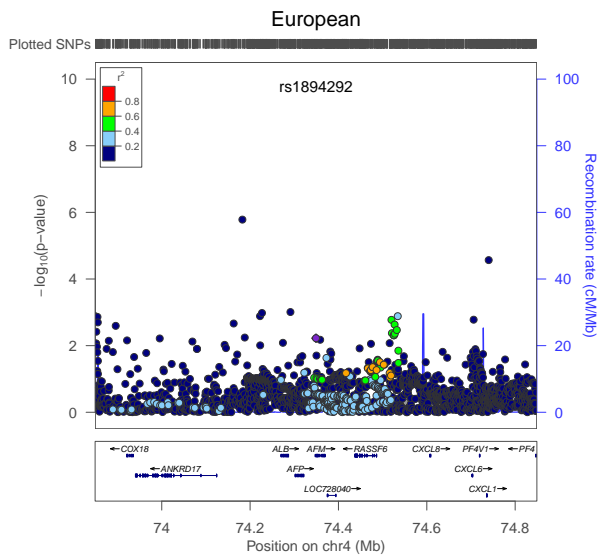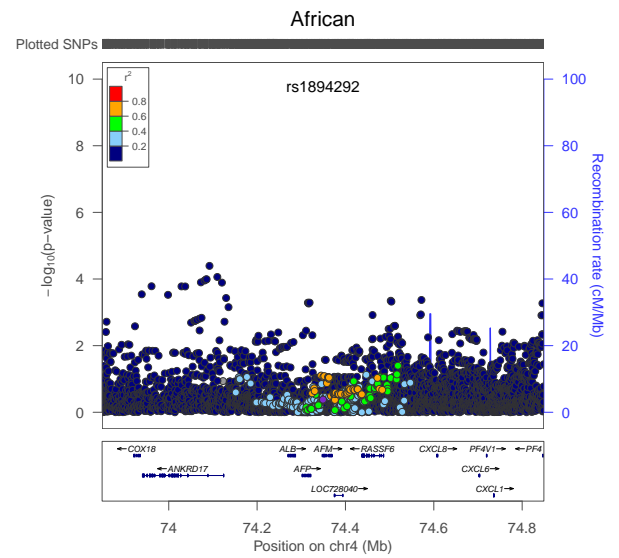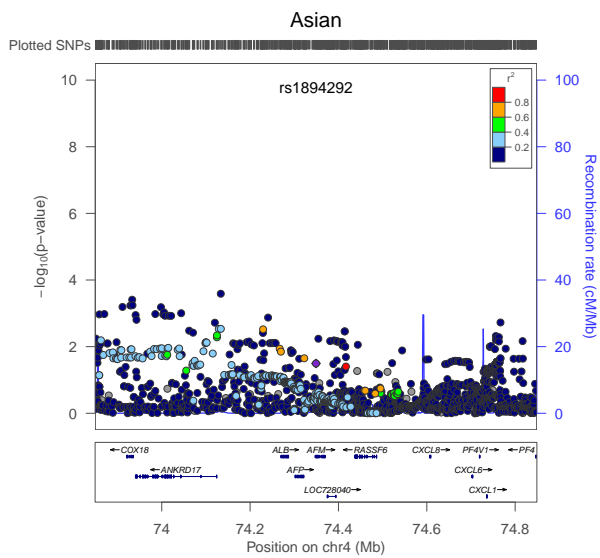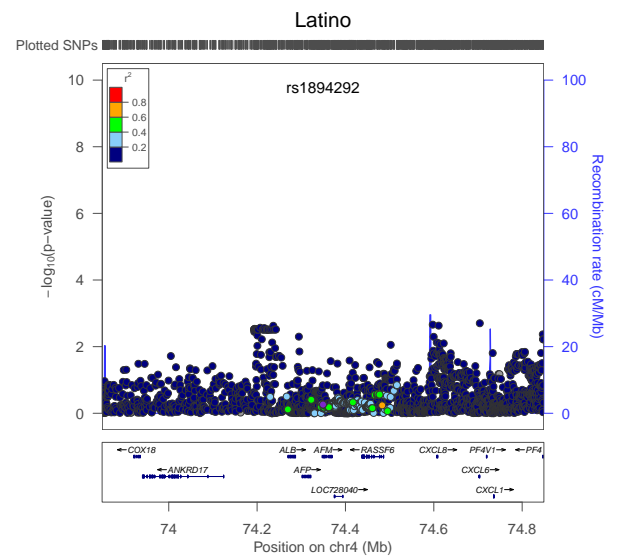

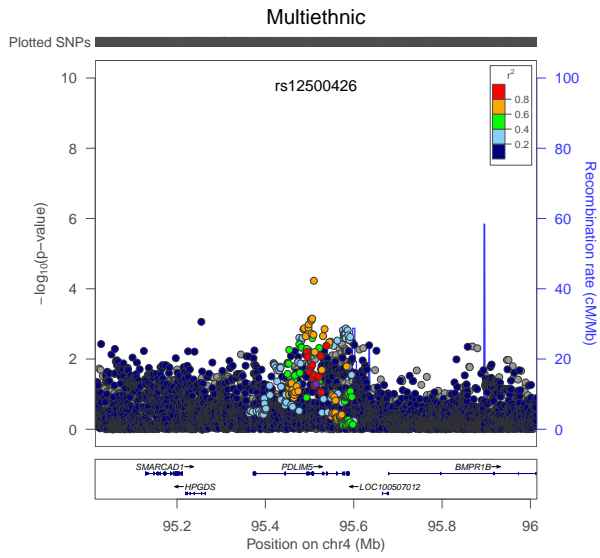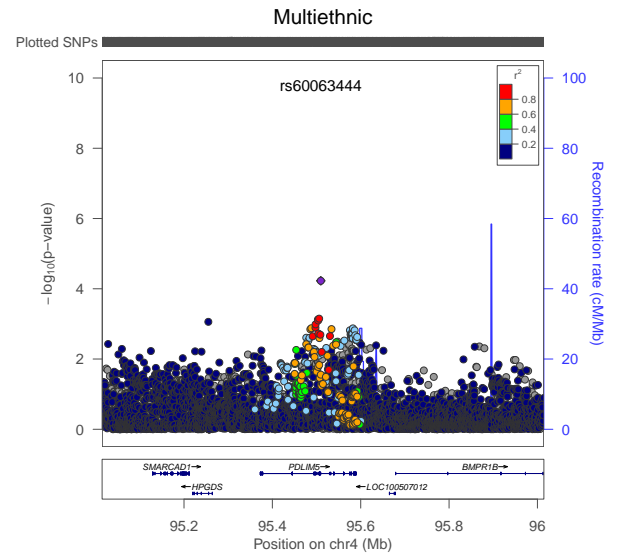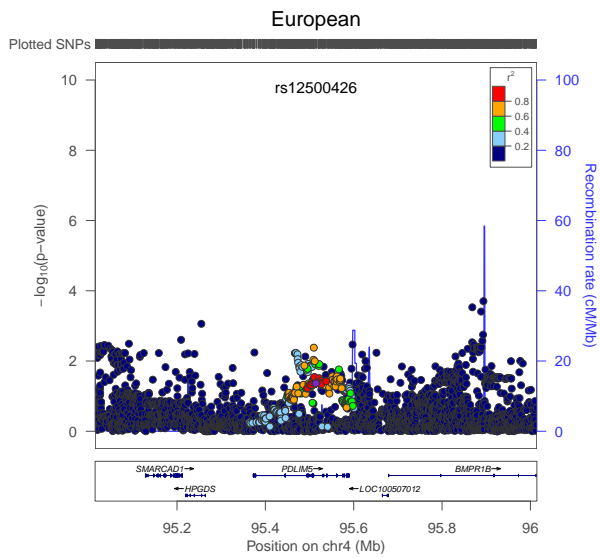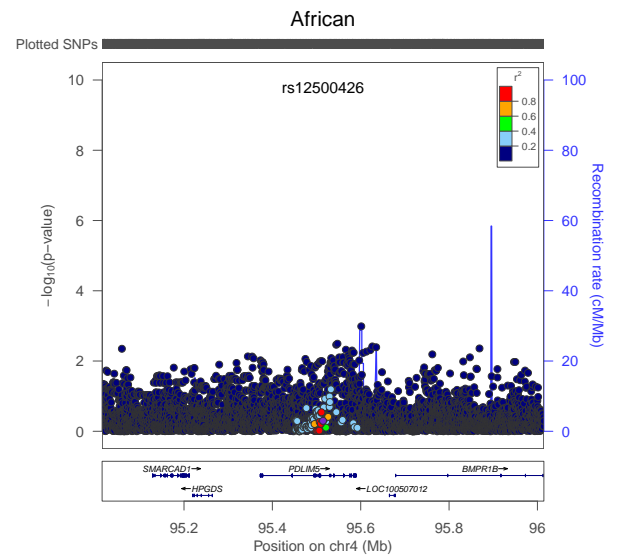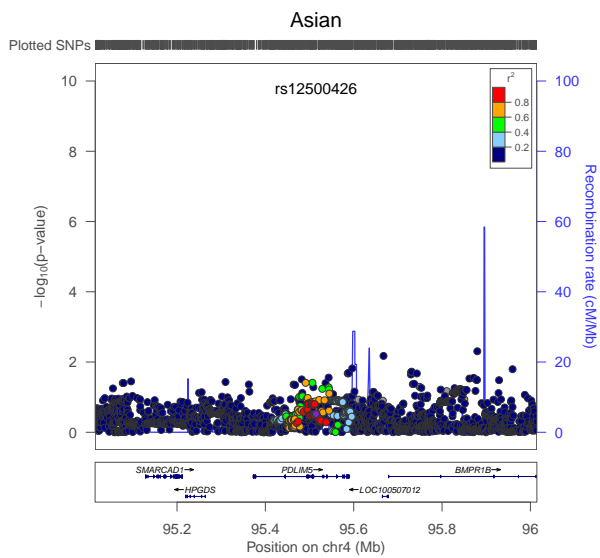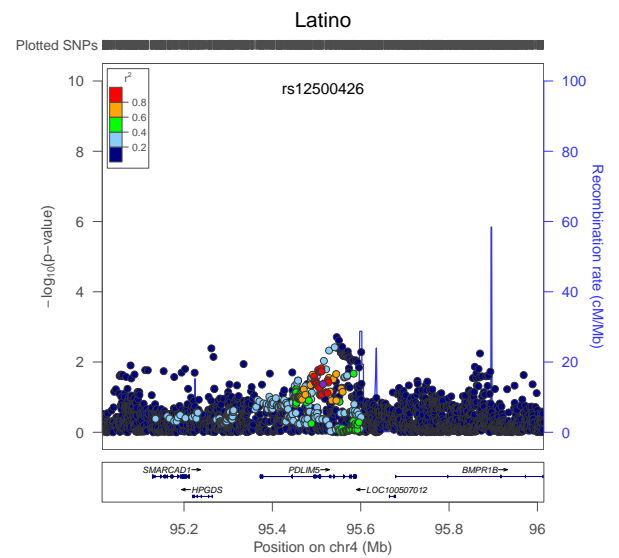

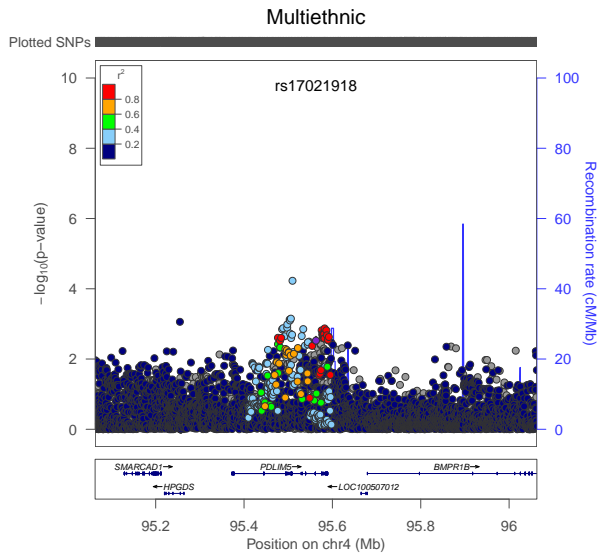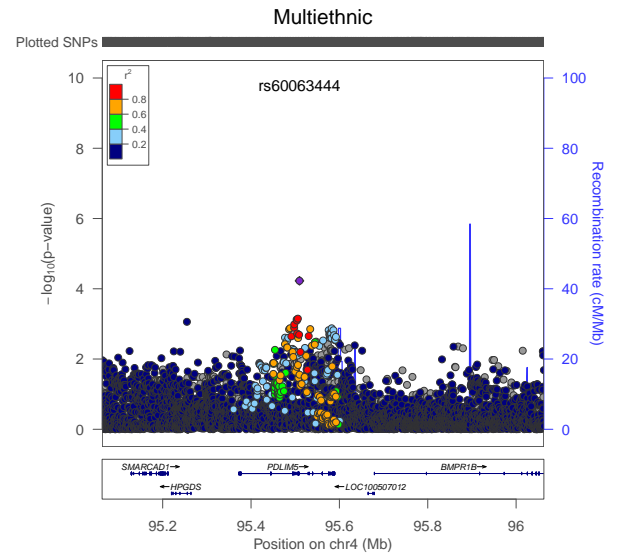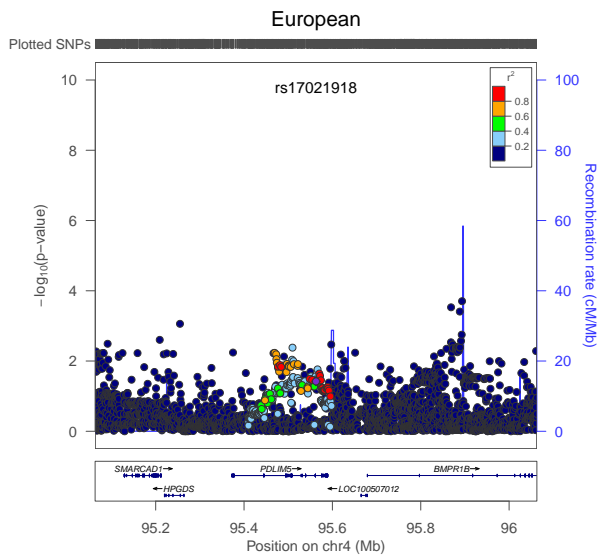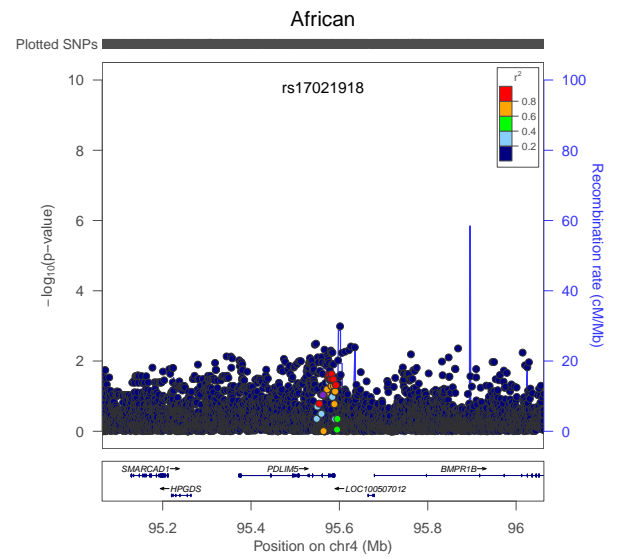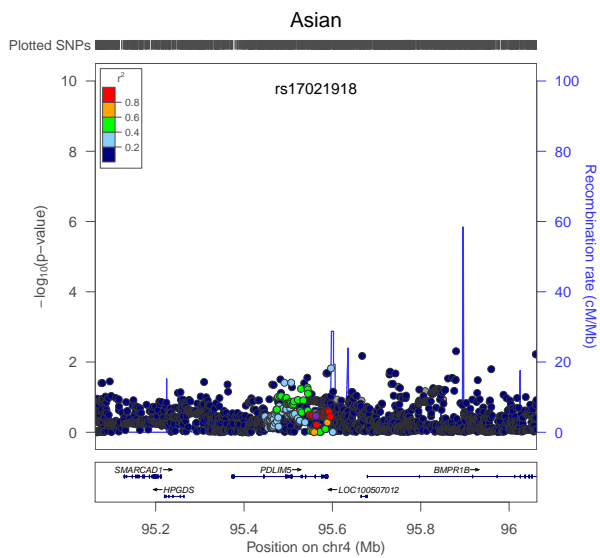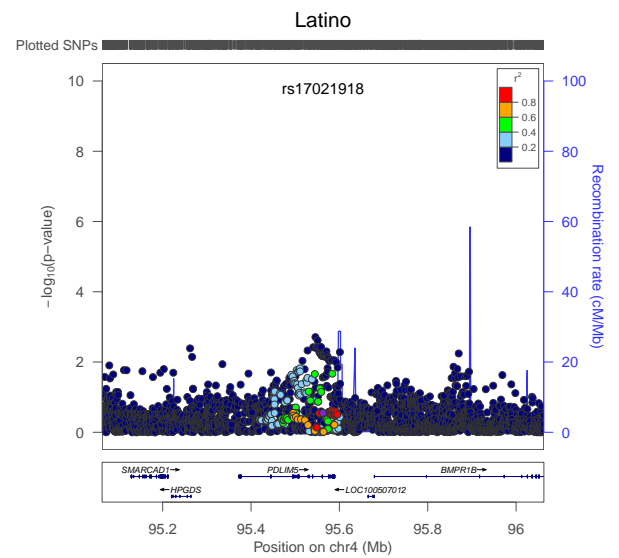

### Multiethnic

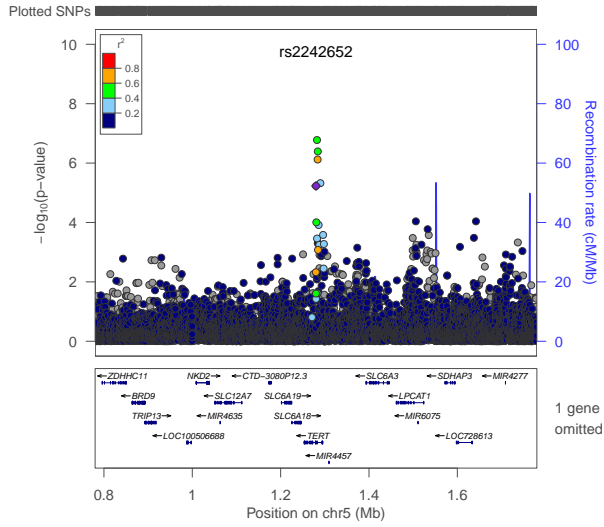

### Multiethnic

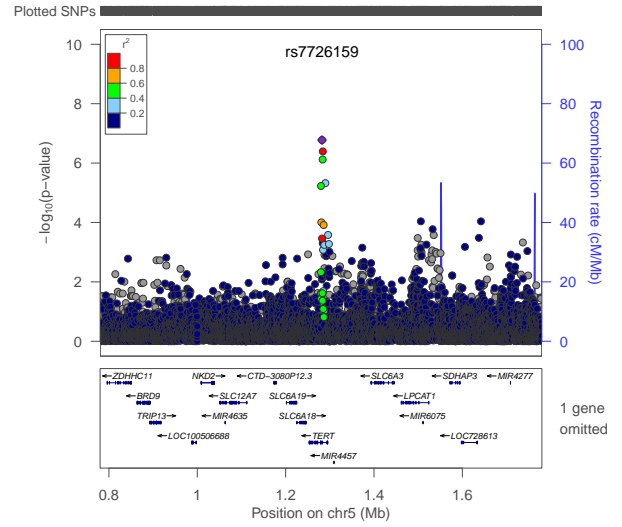

### European

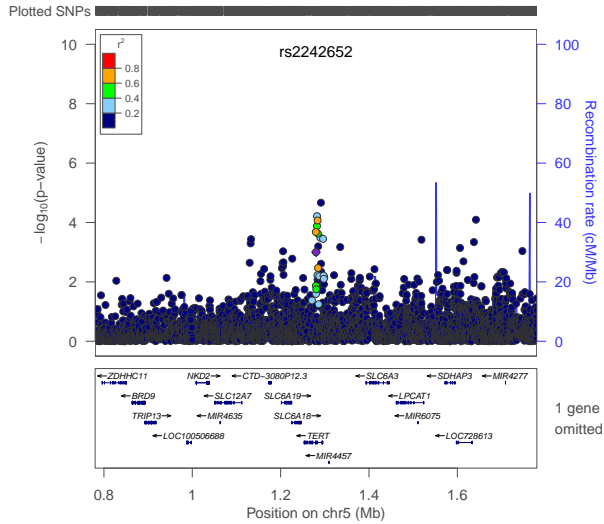

### African

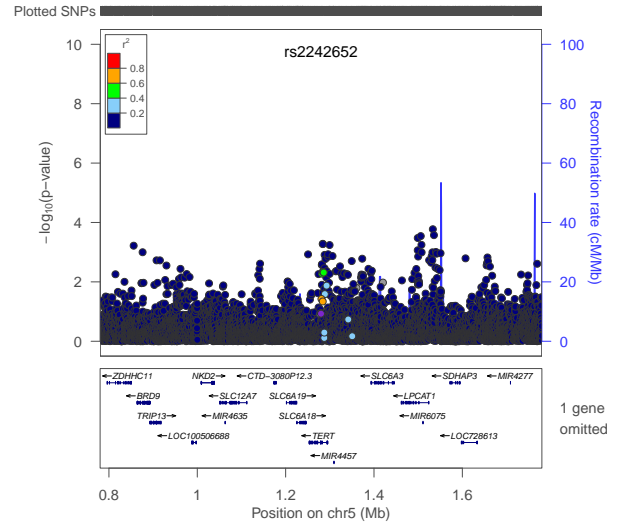

### Asian

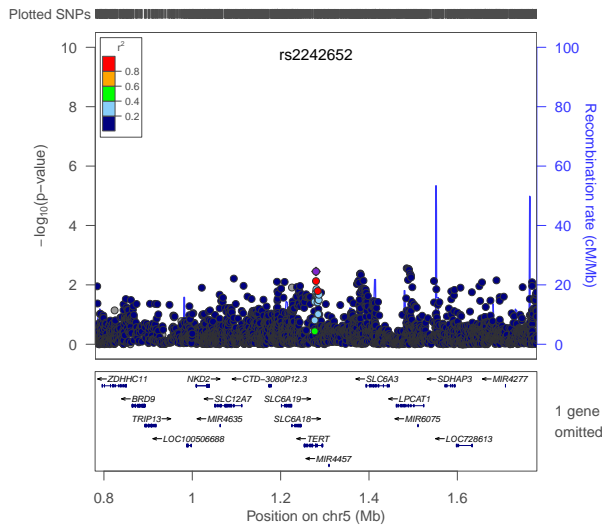

### Latino

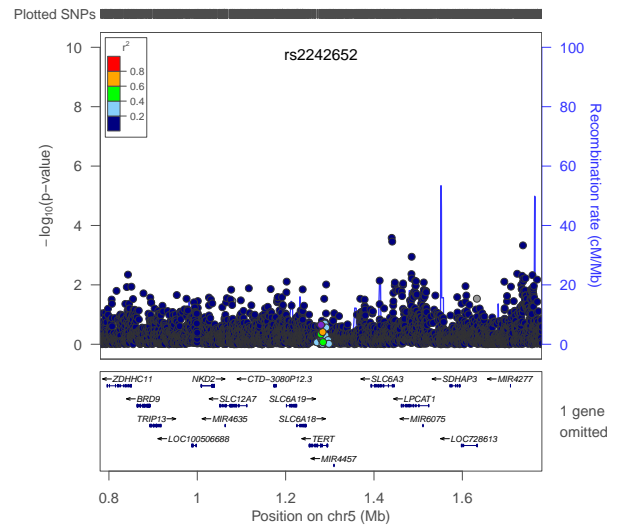

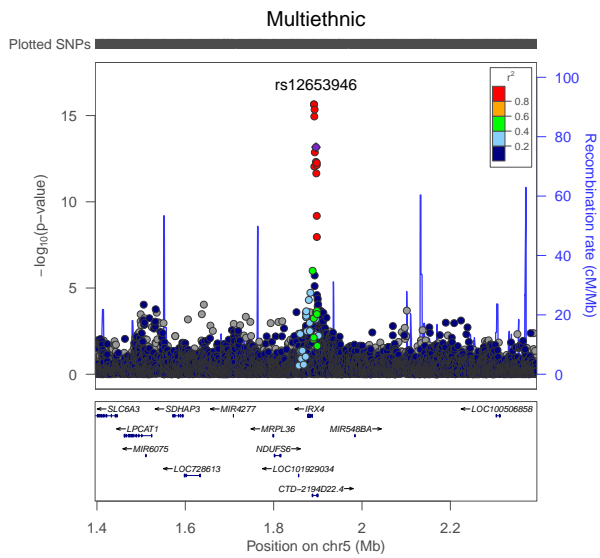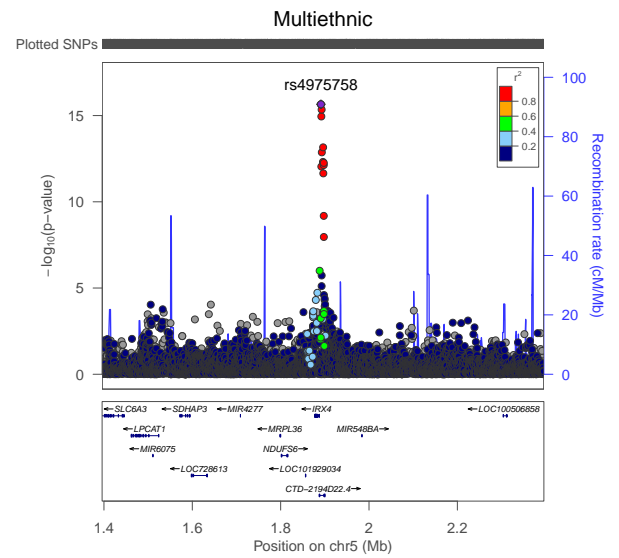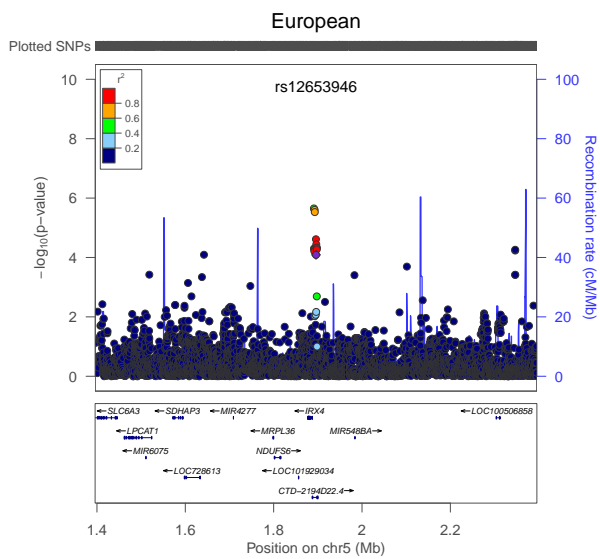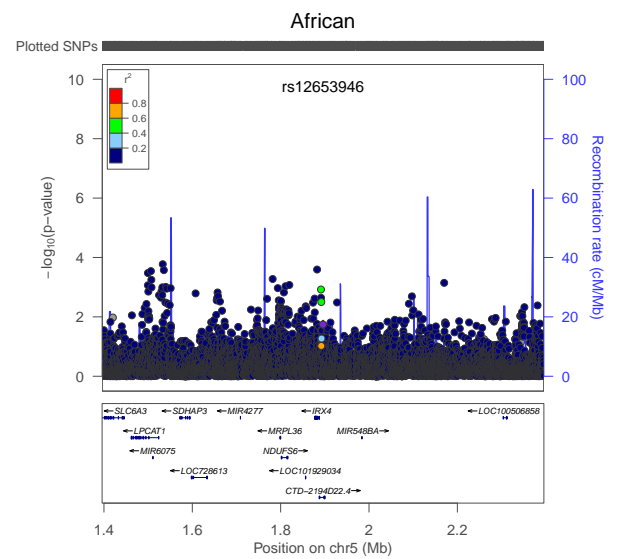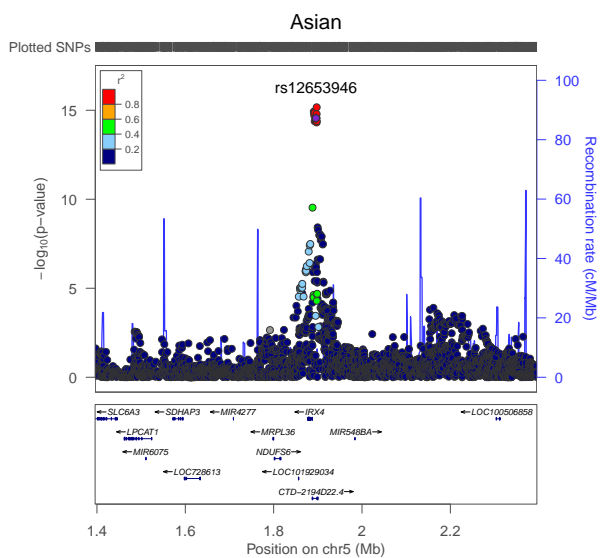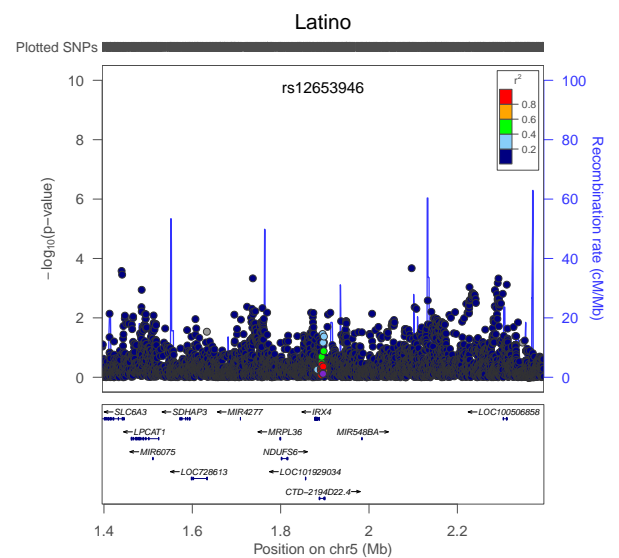

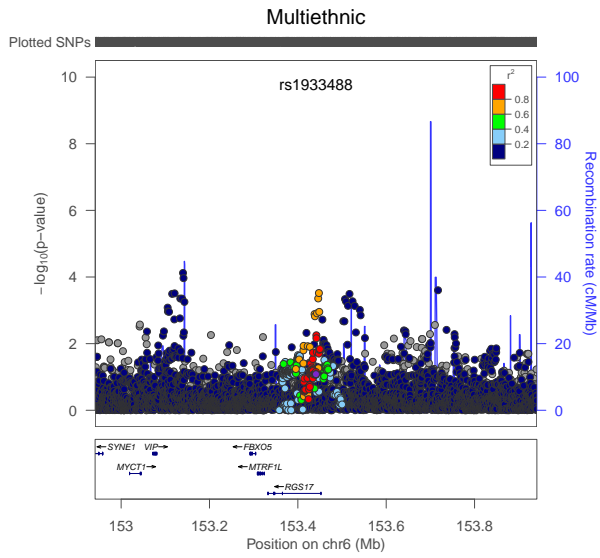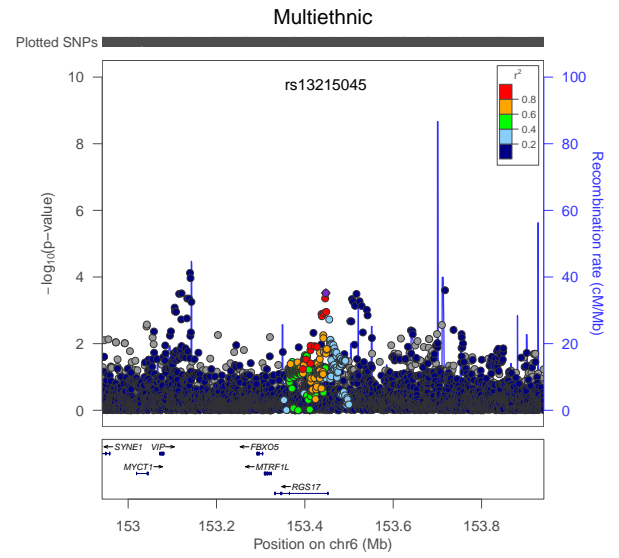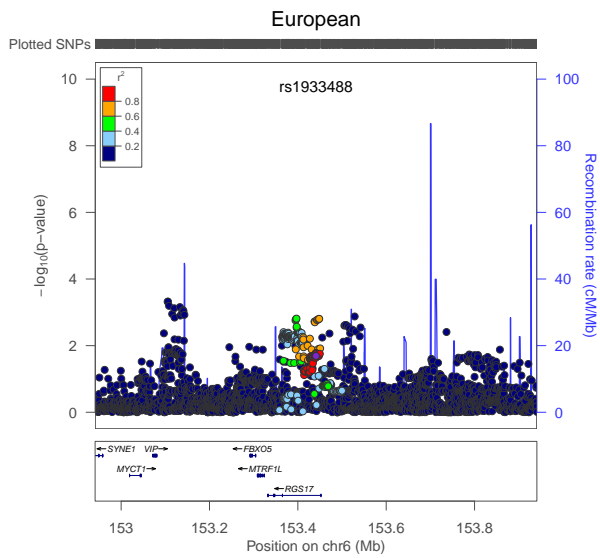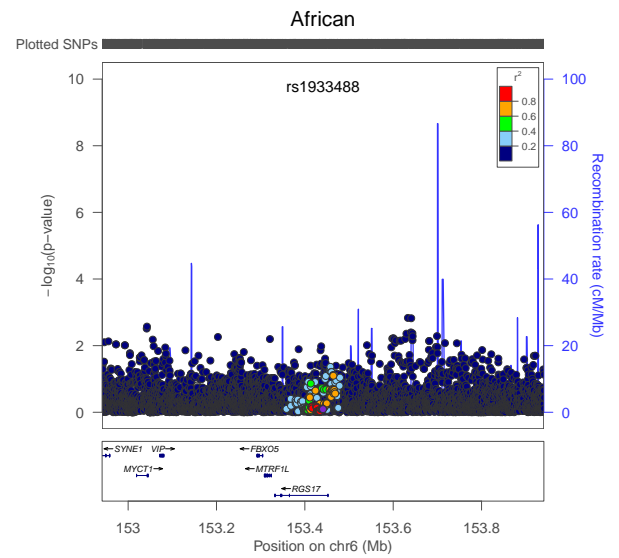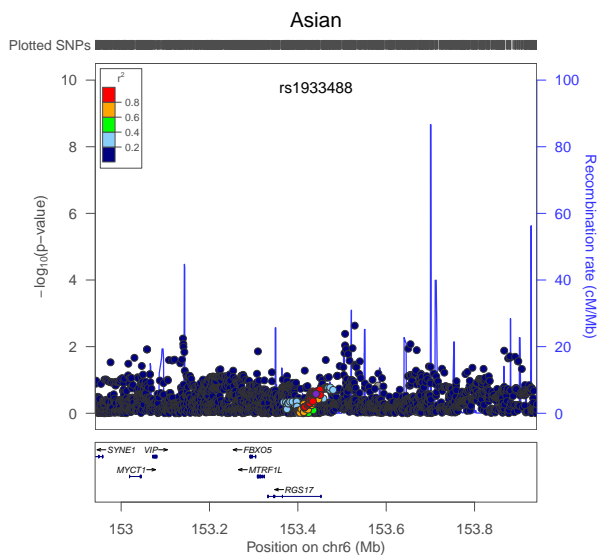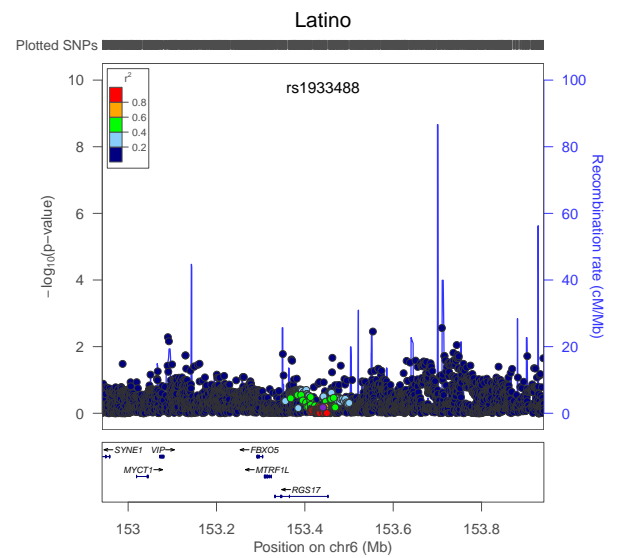



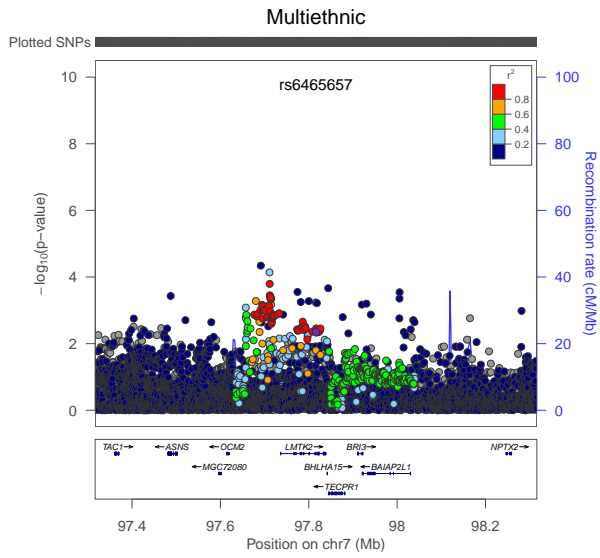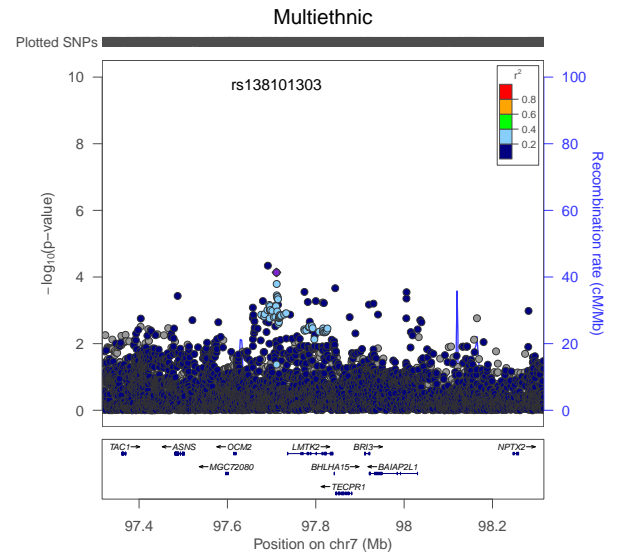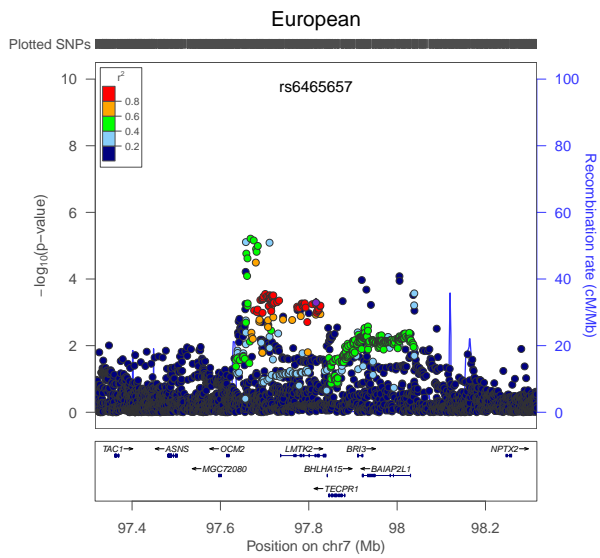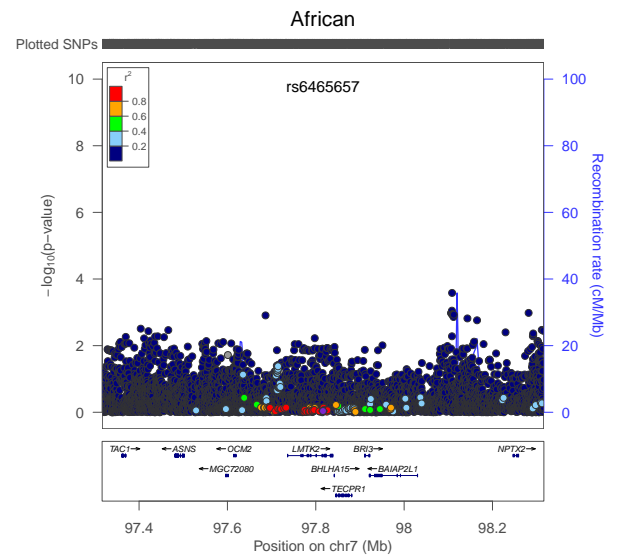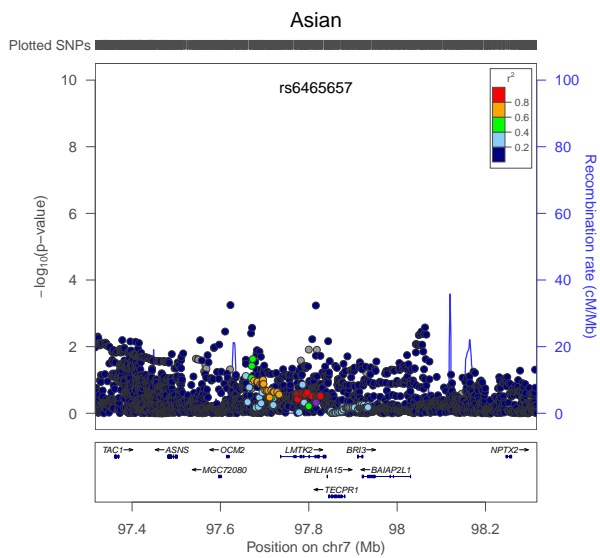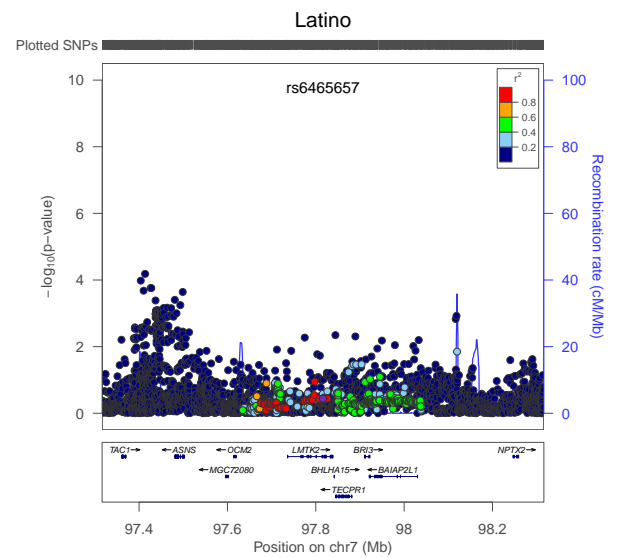

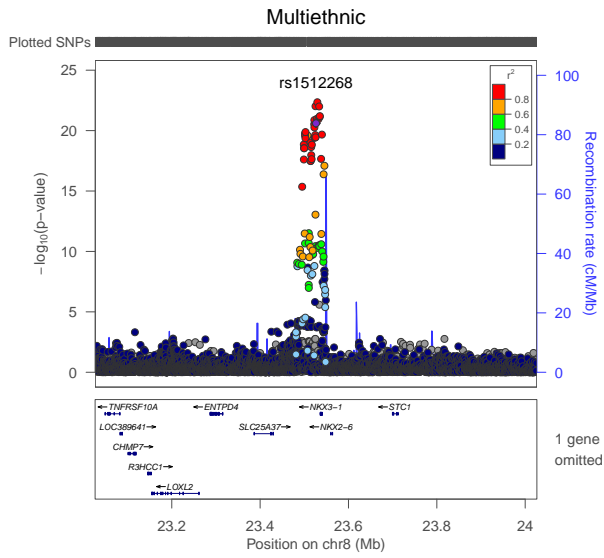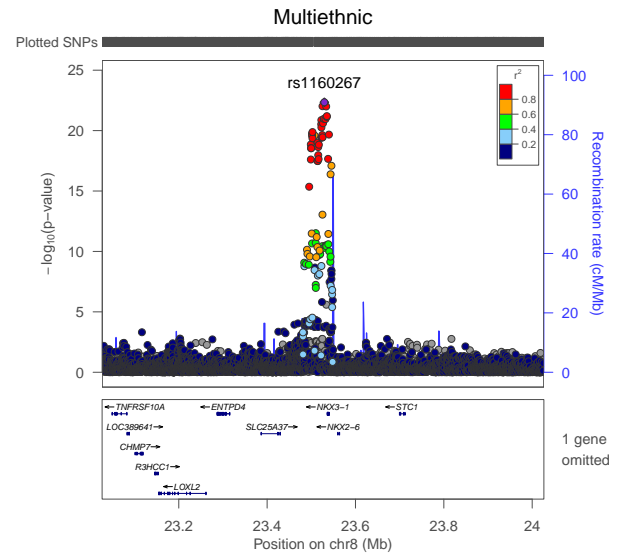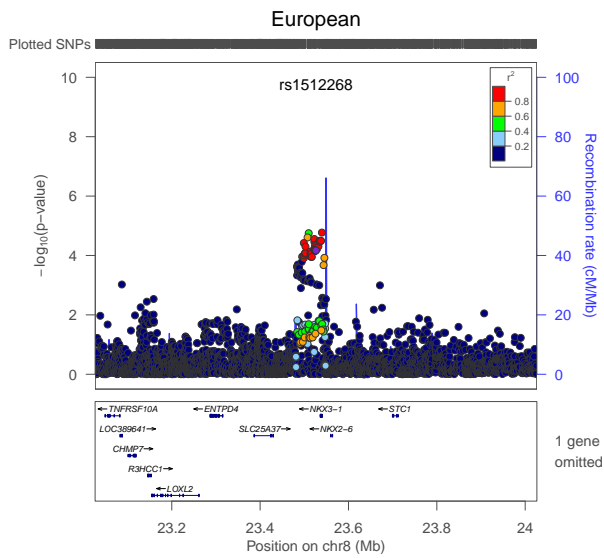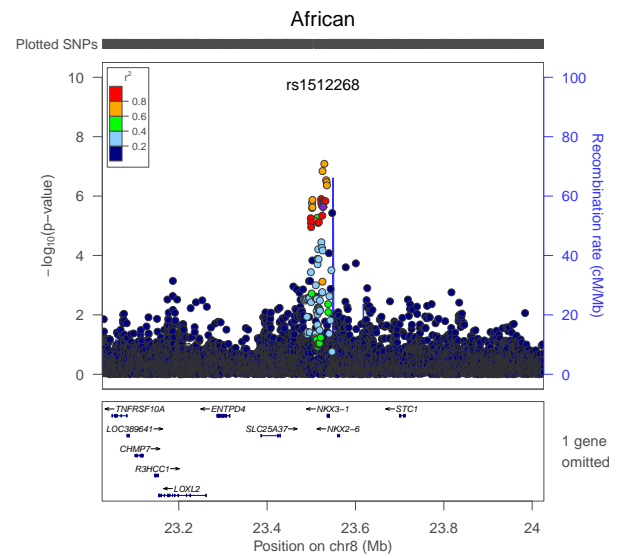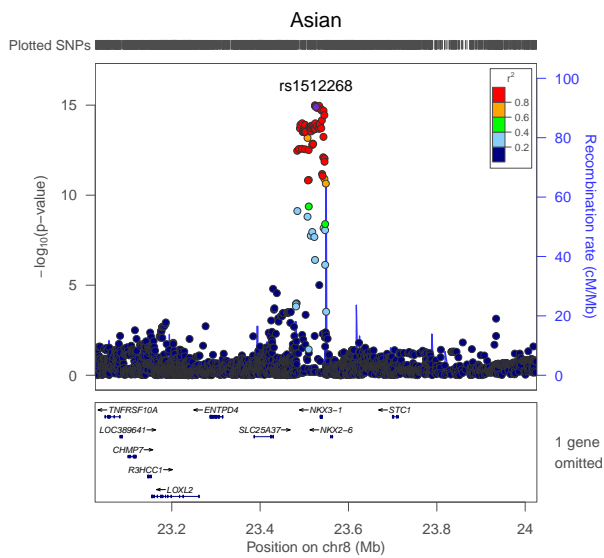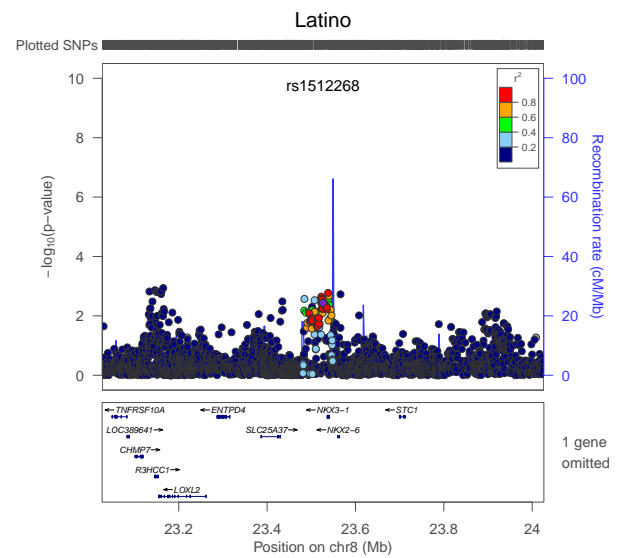

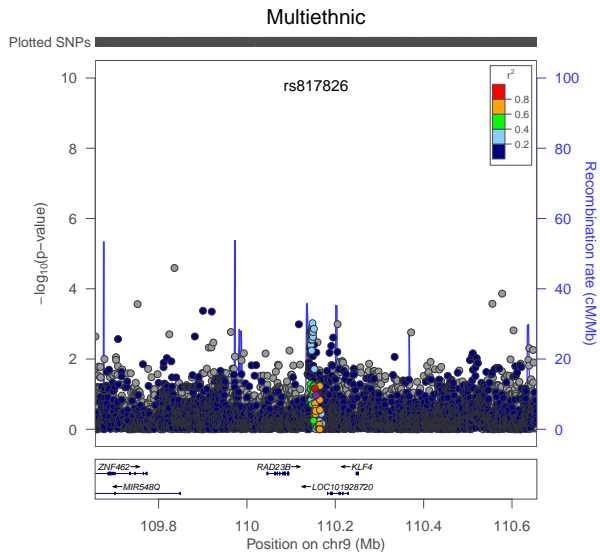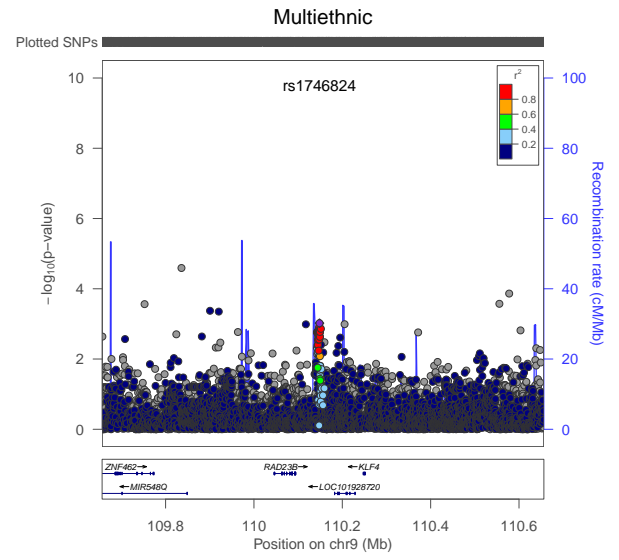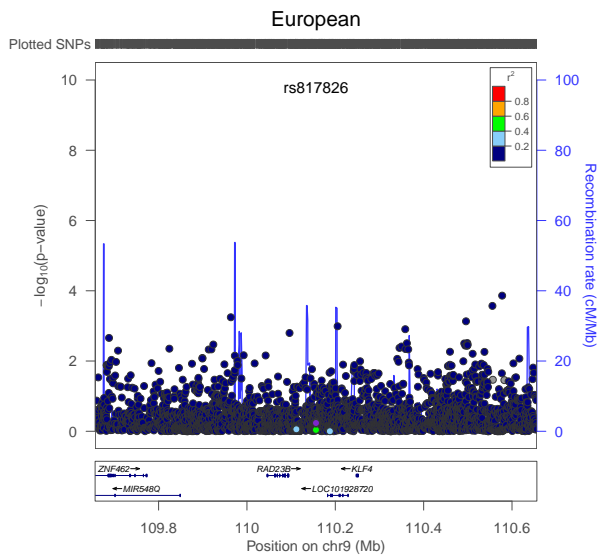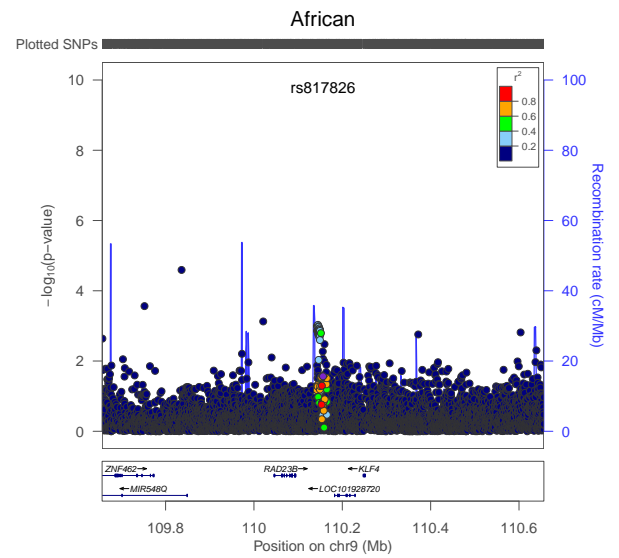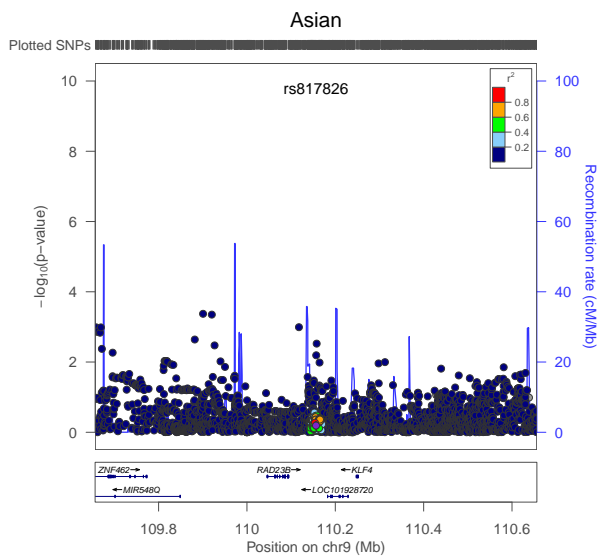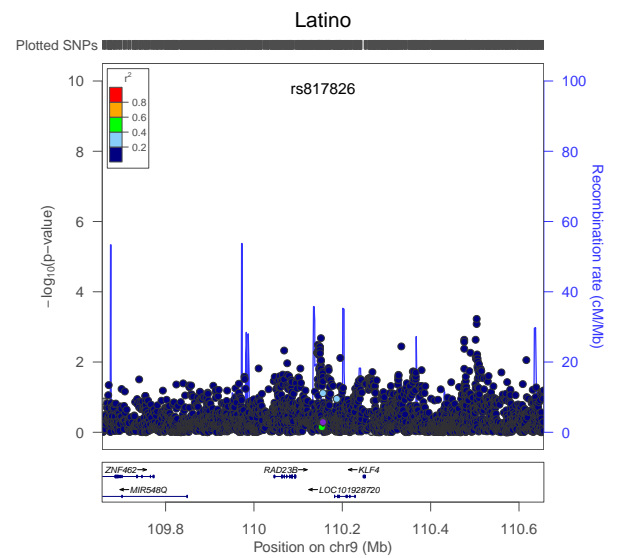

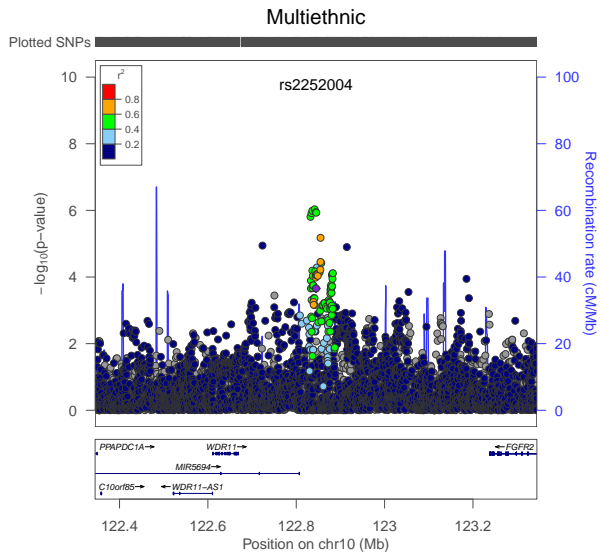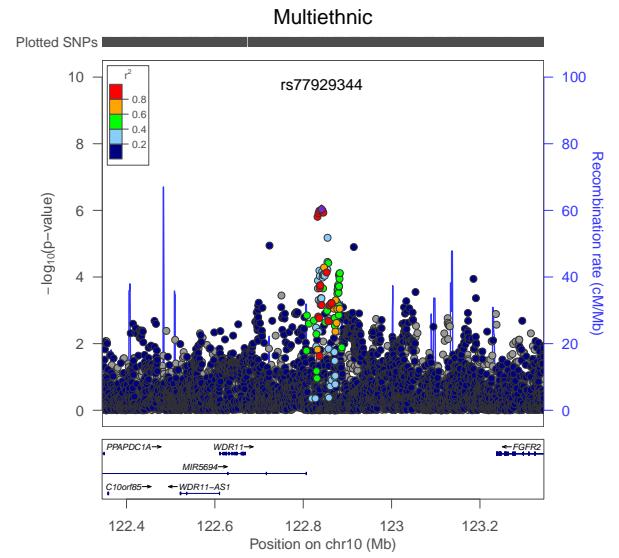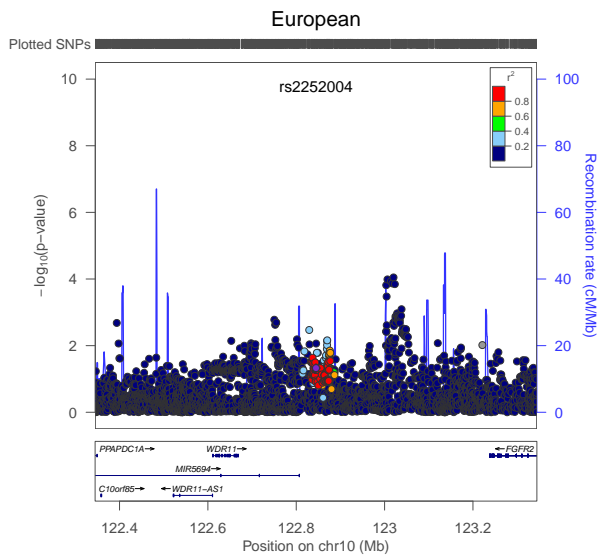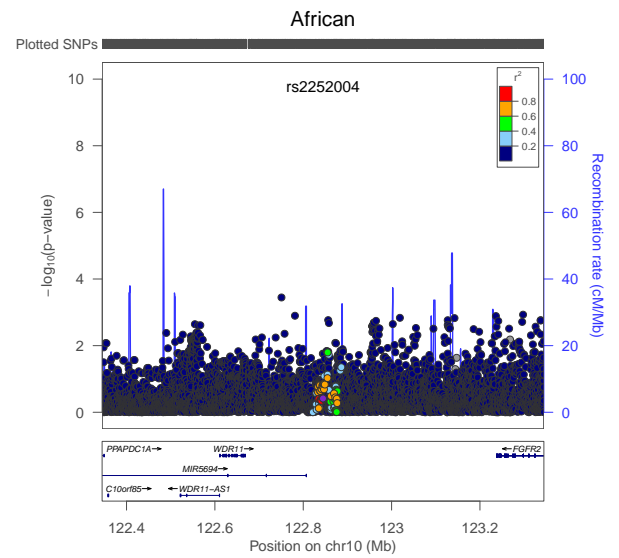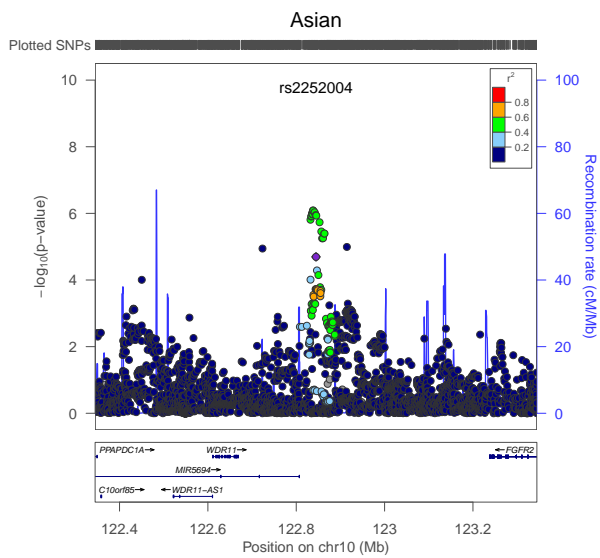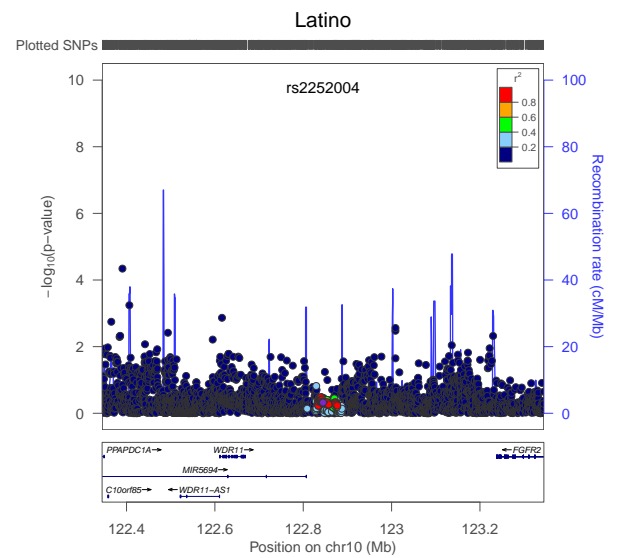

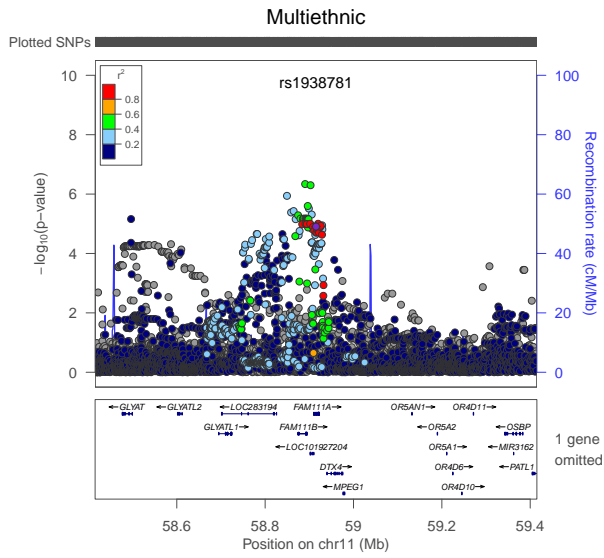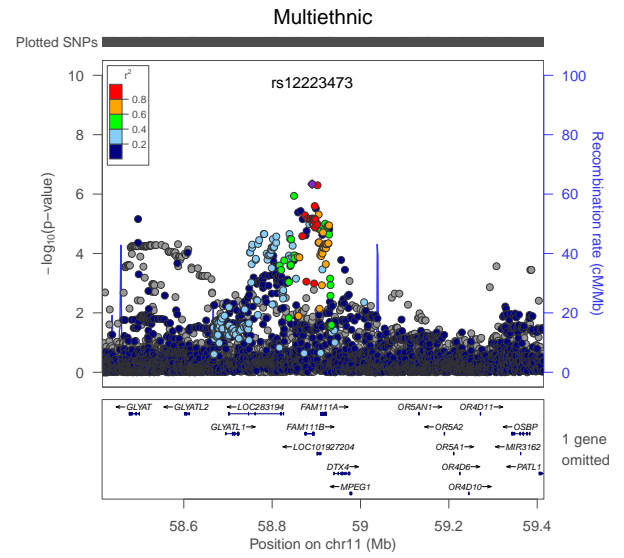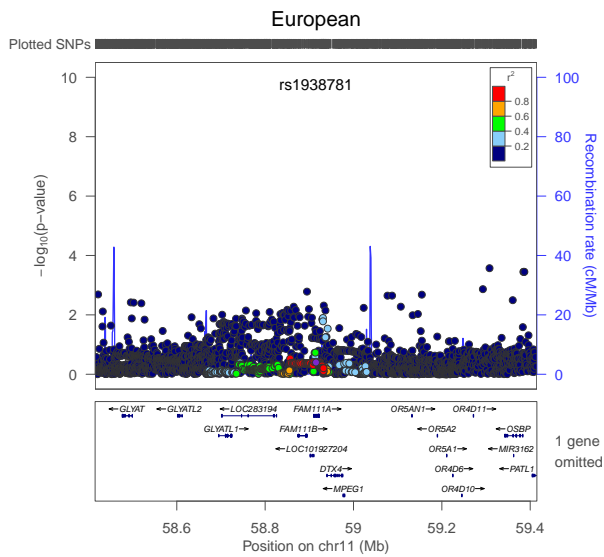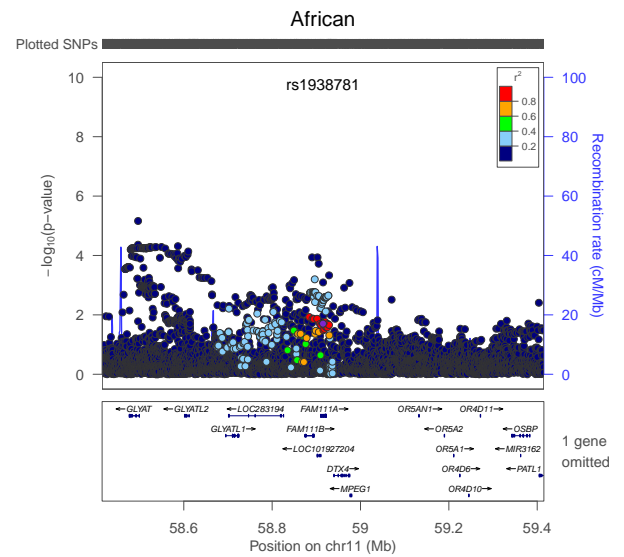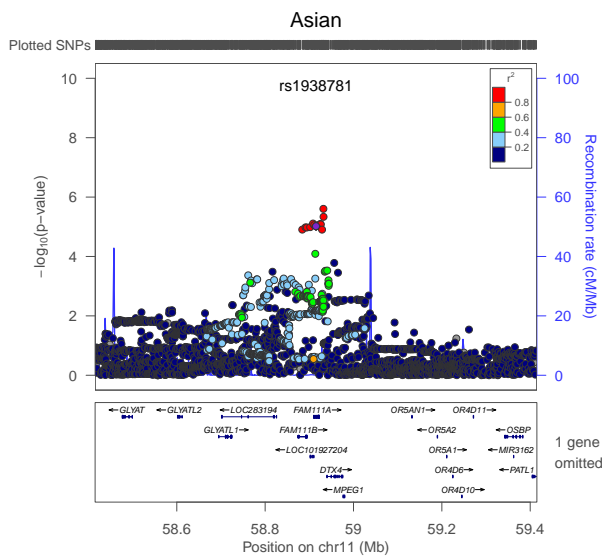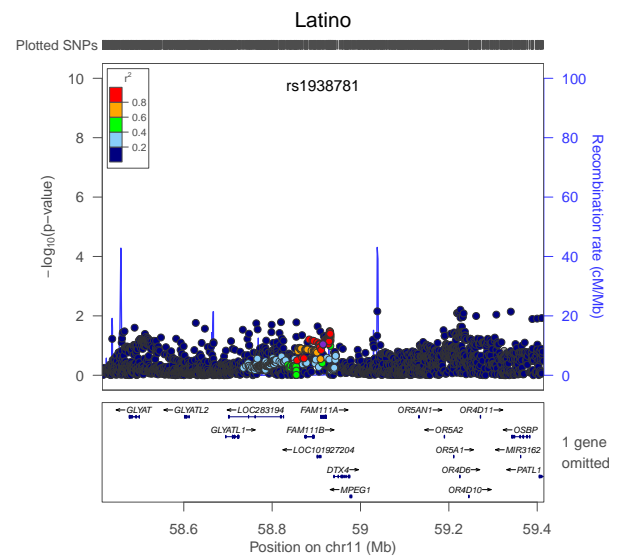

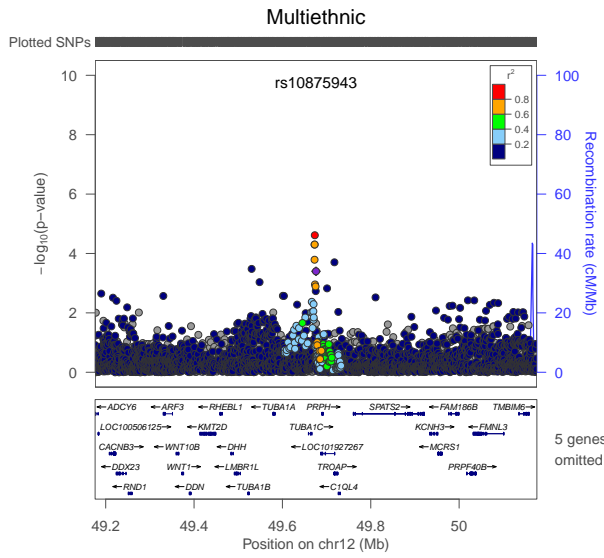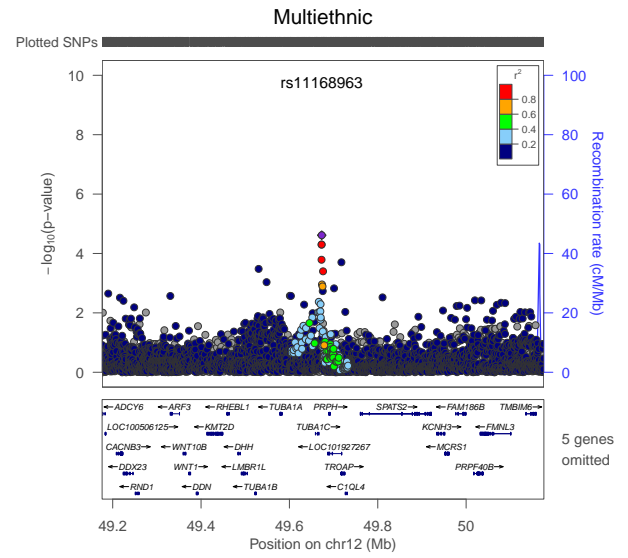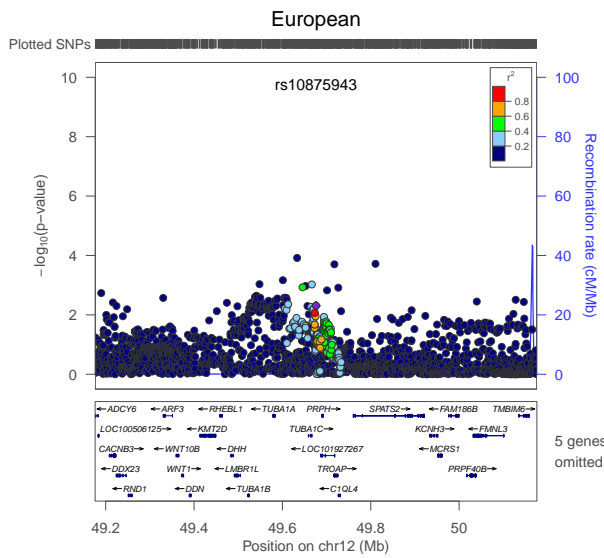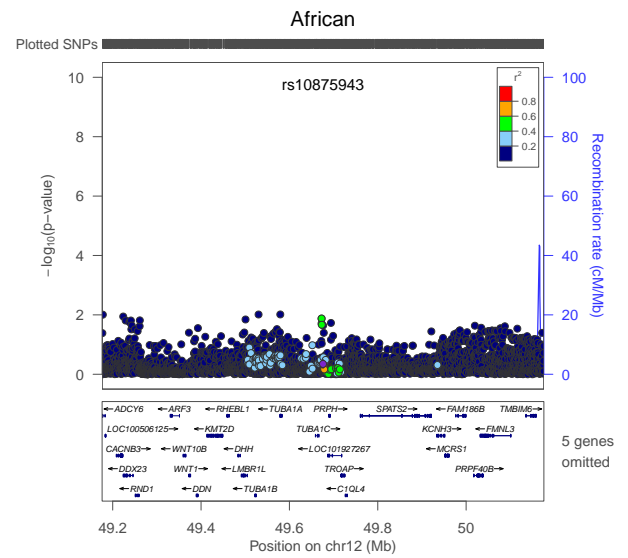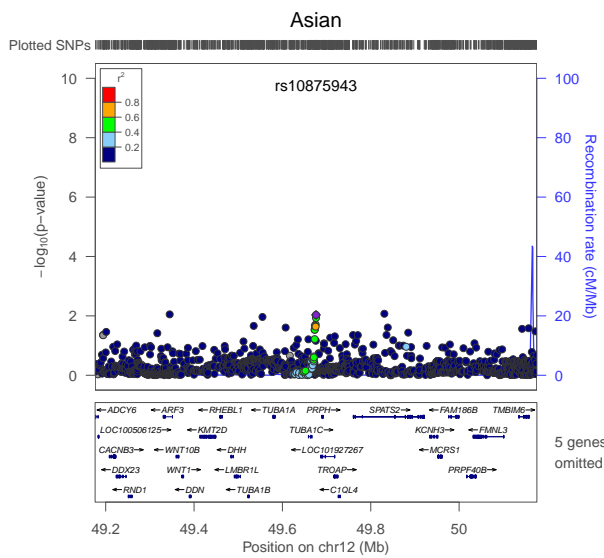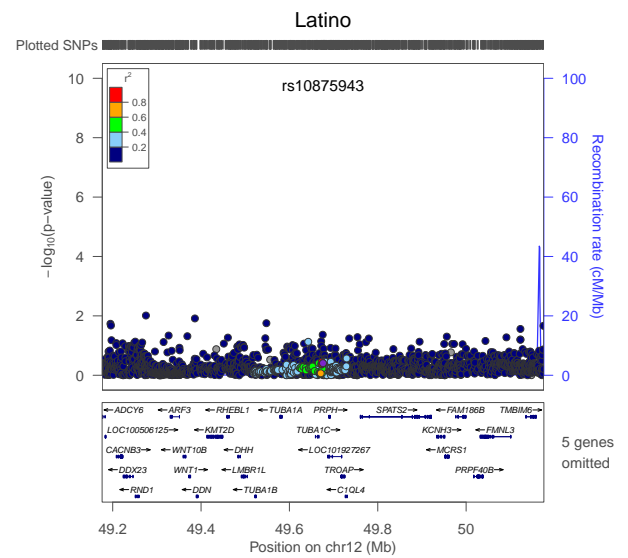

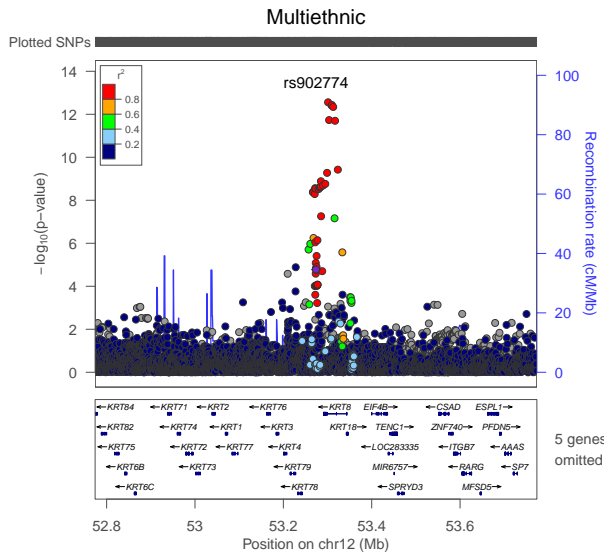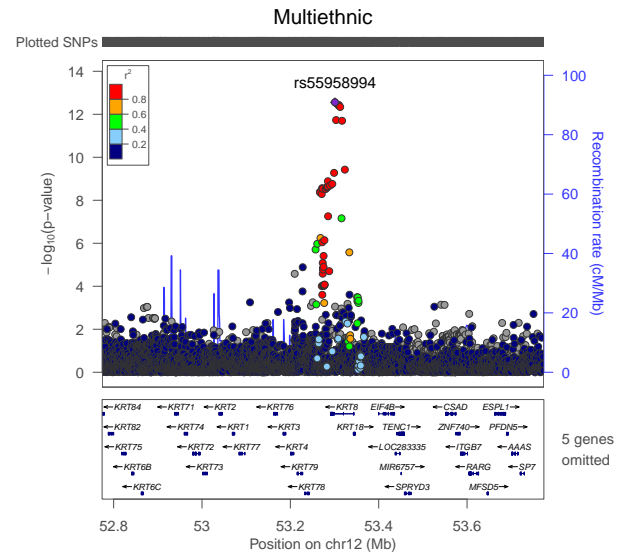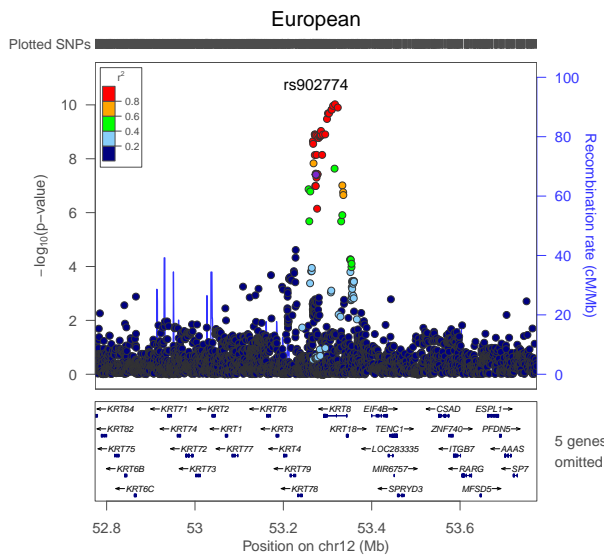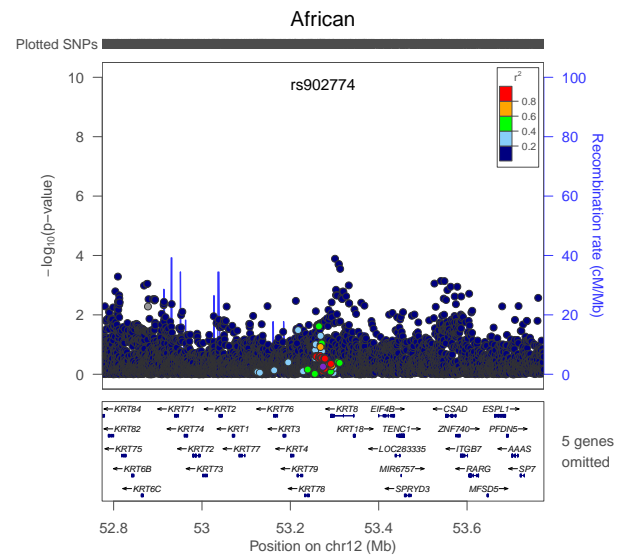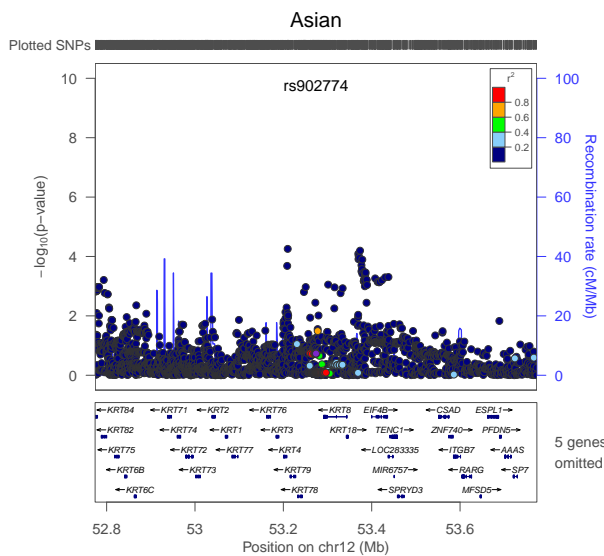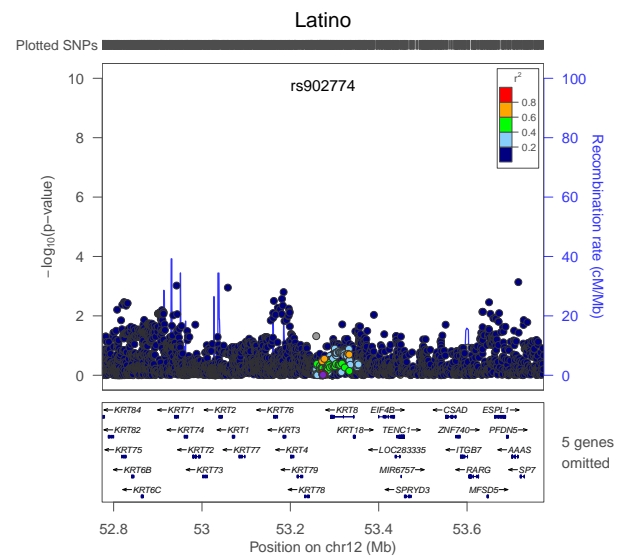

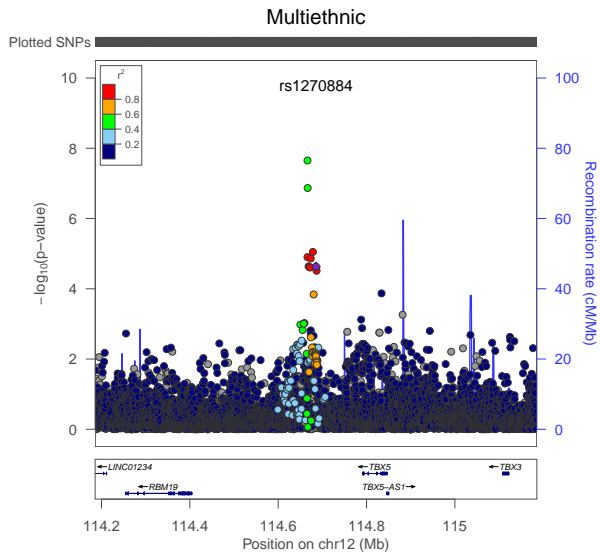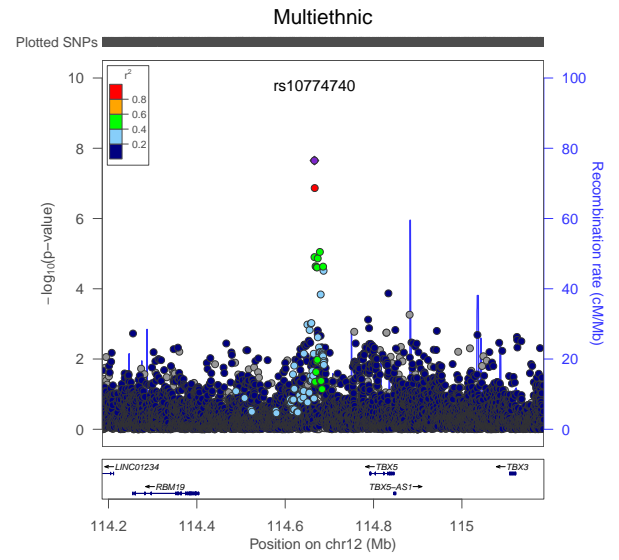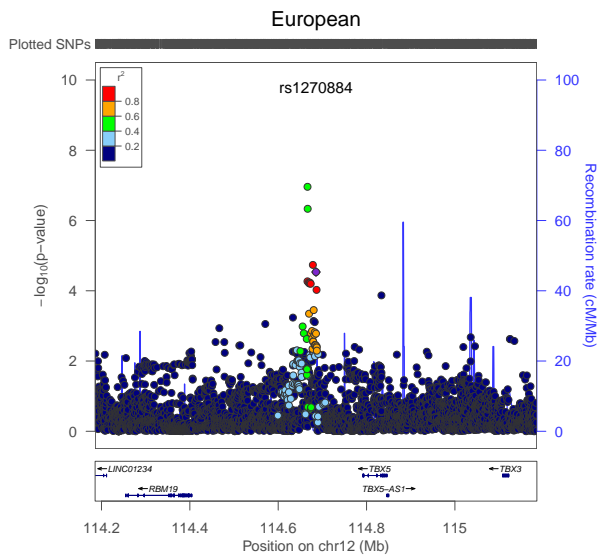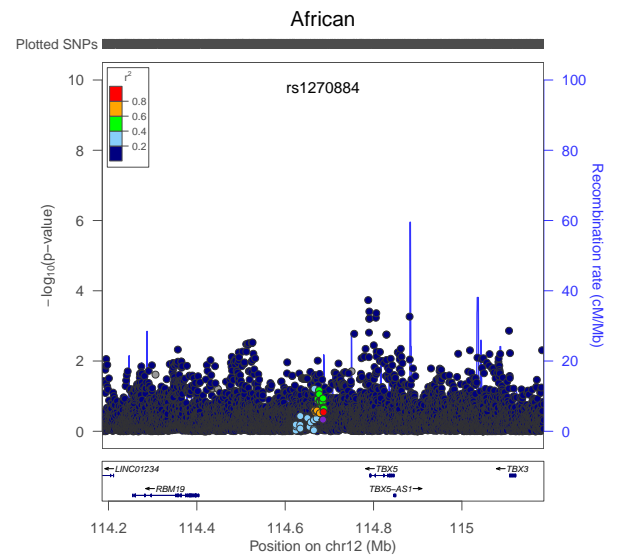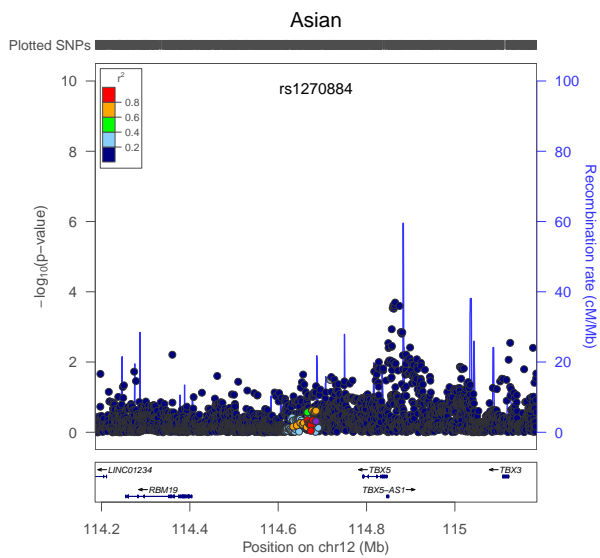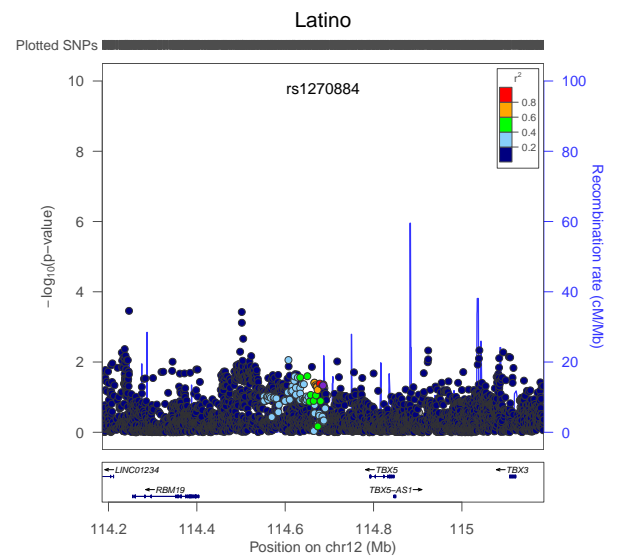



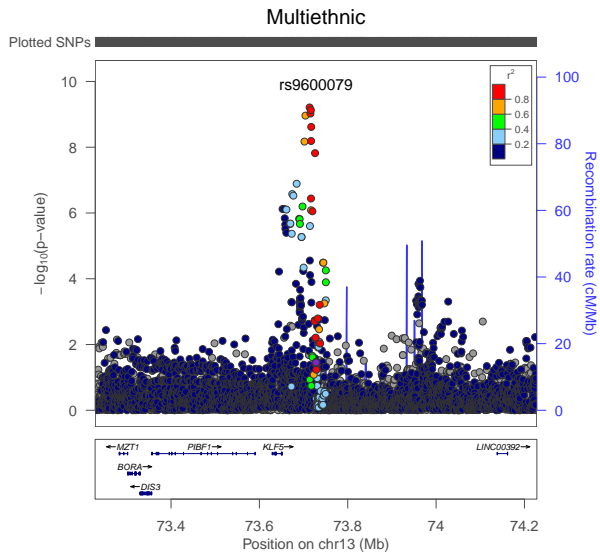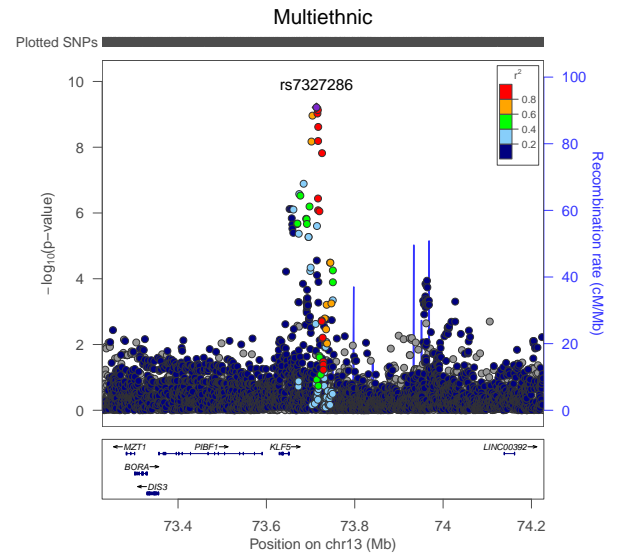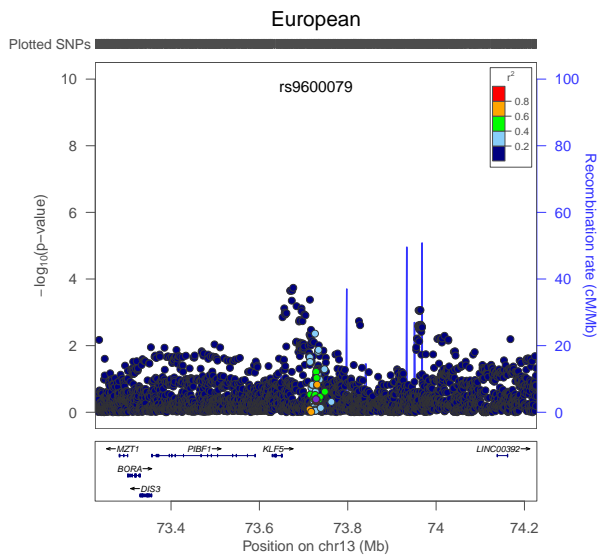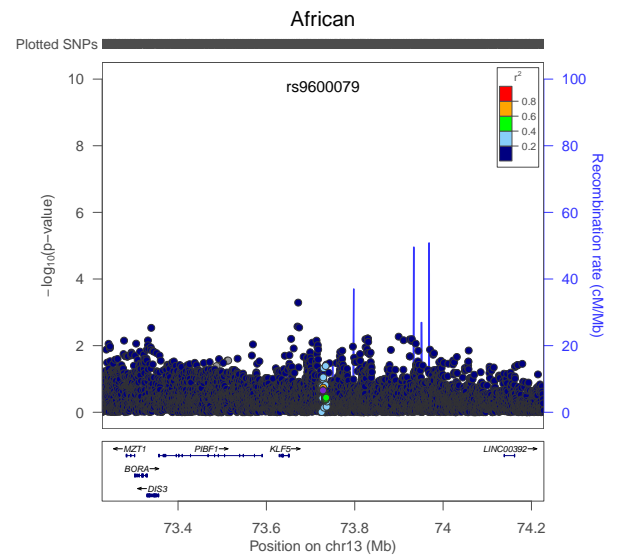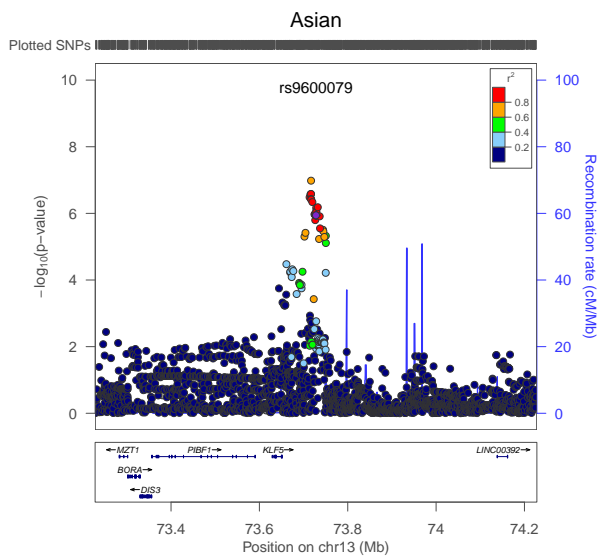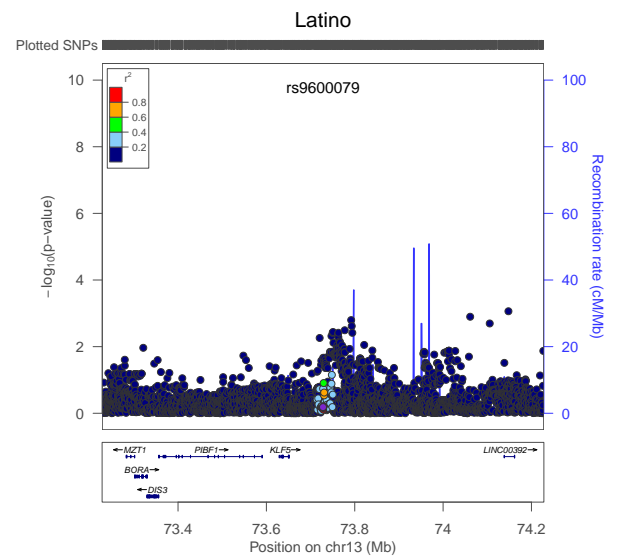

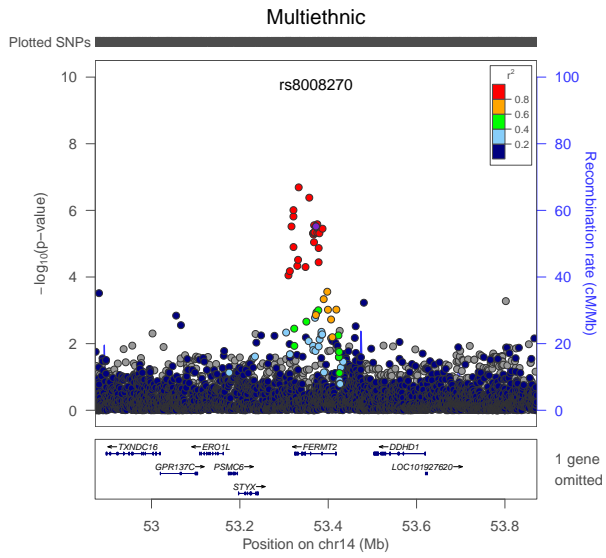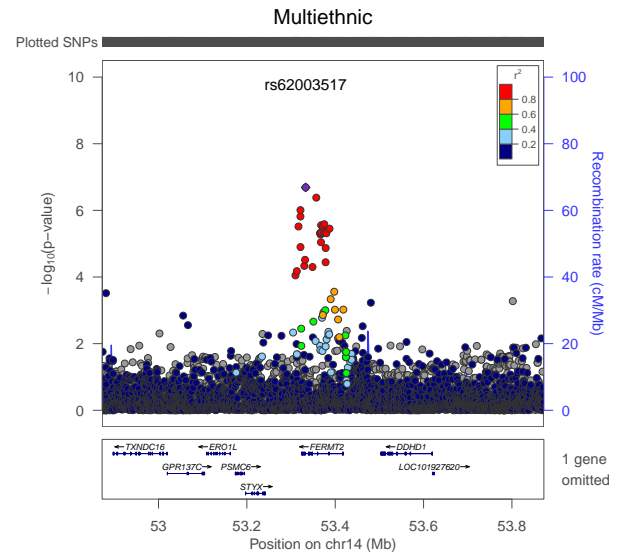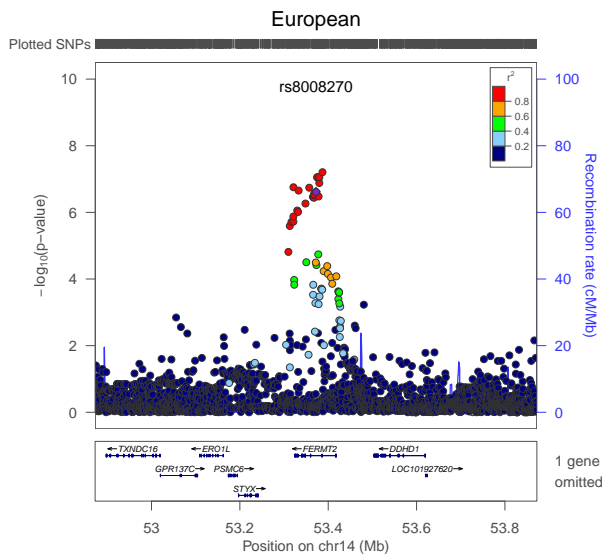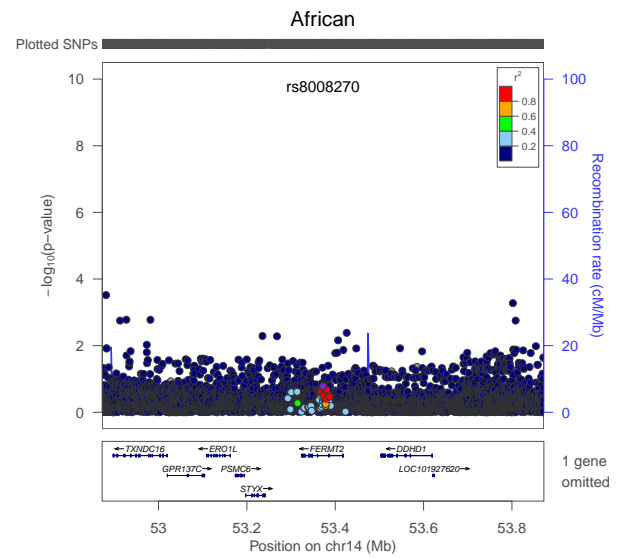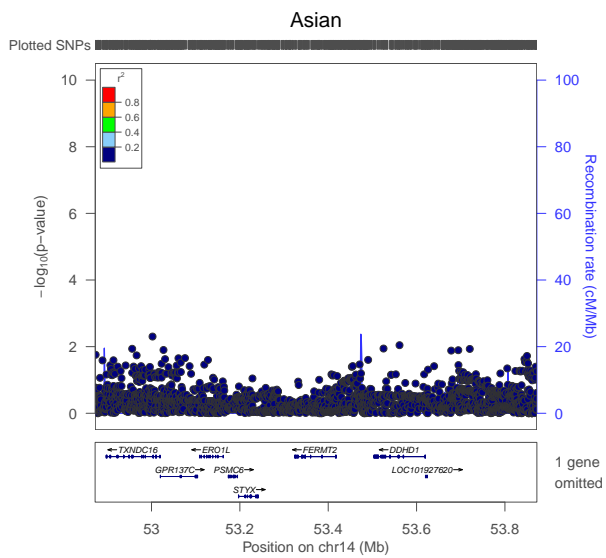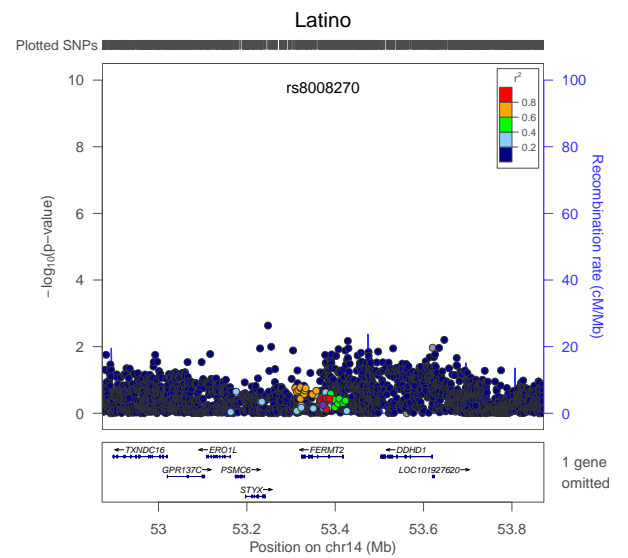

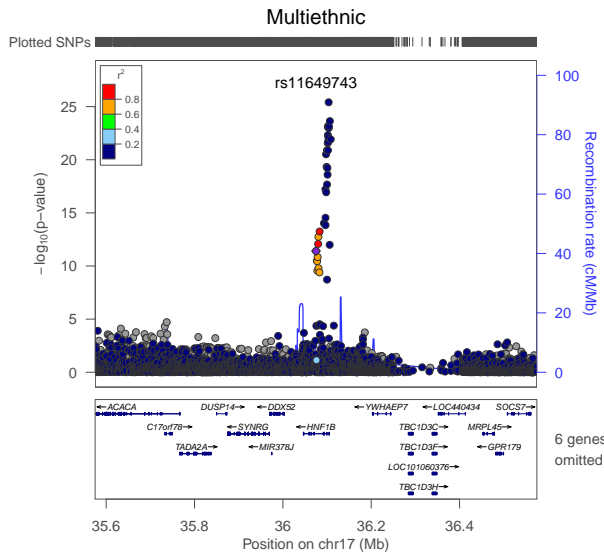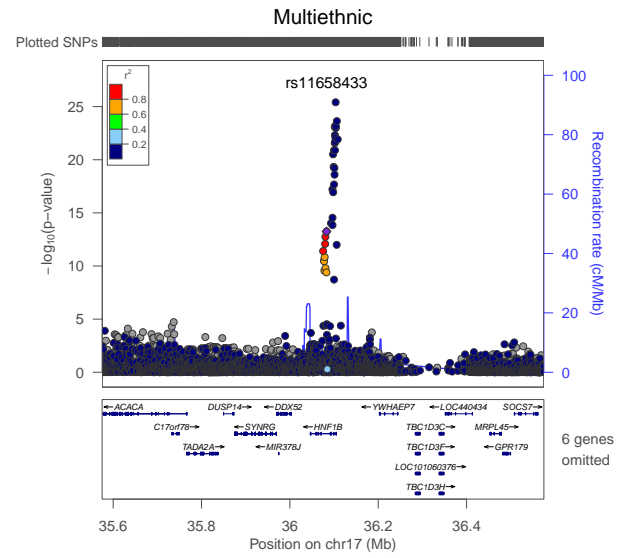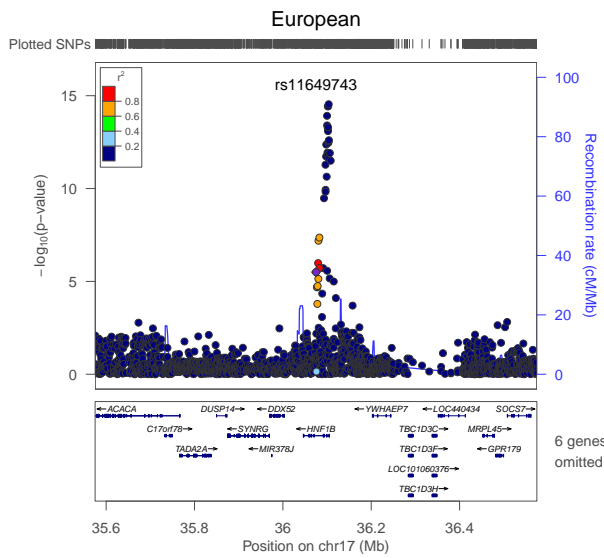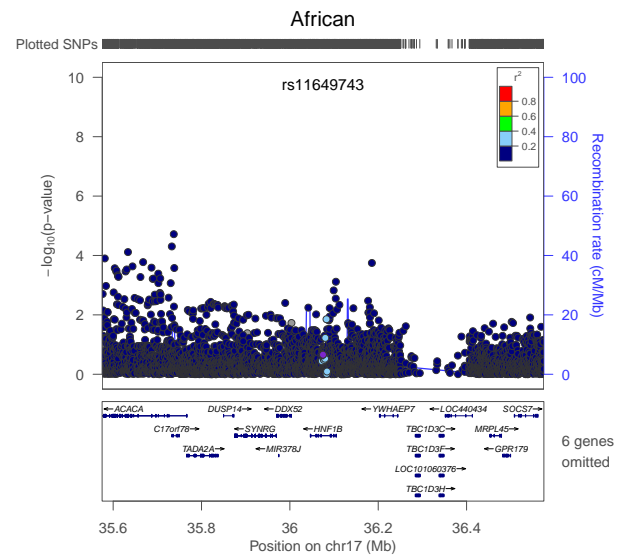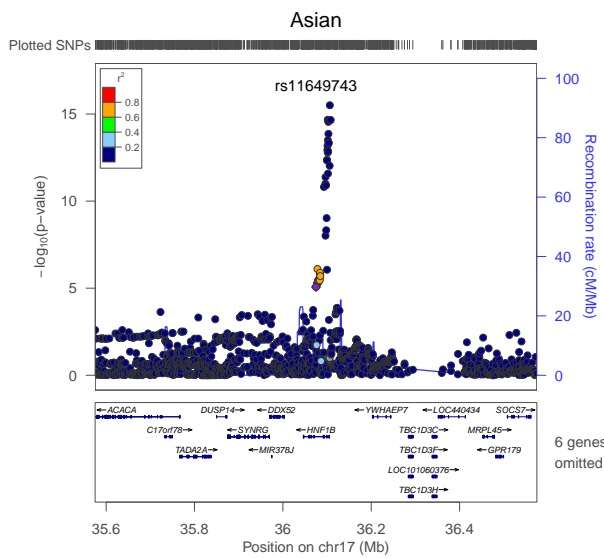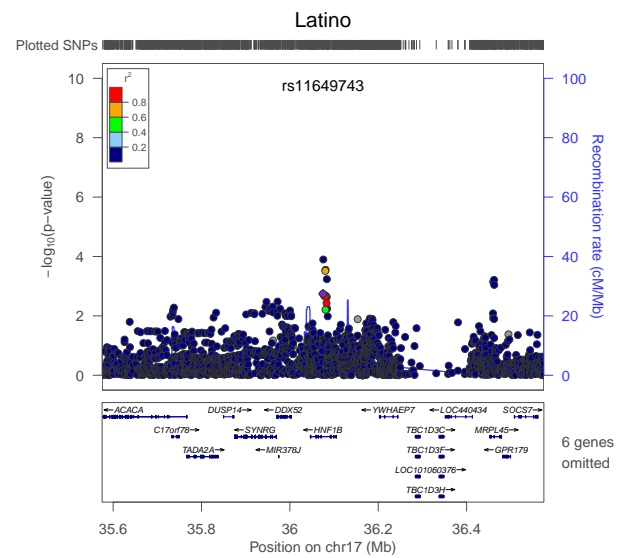

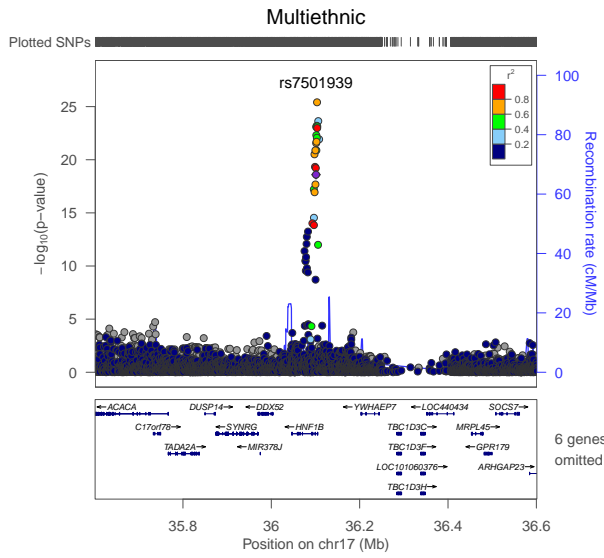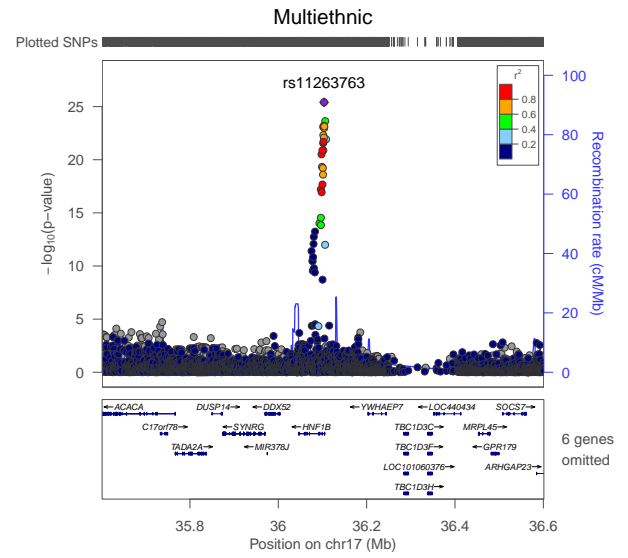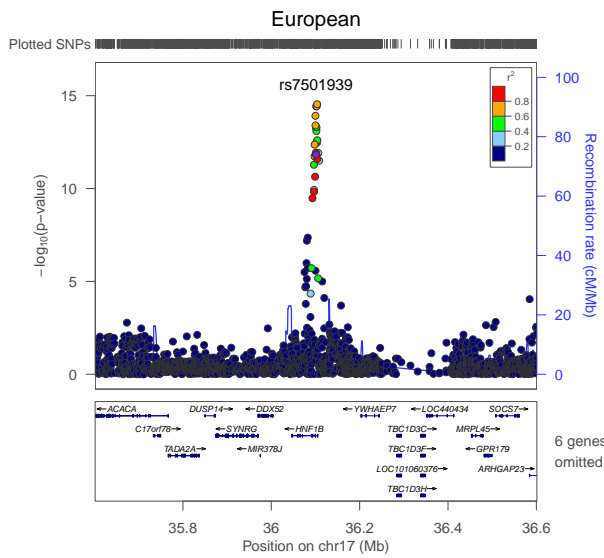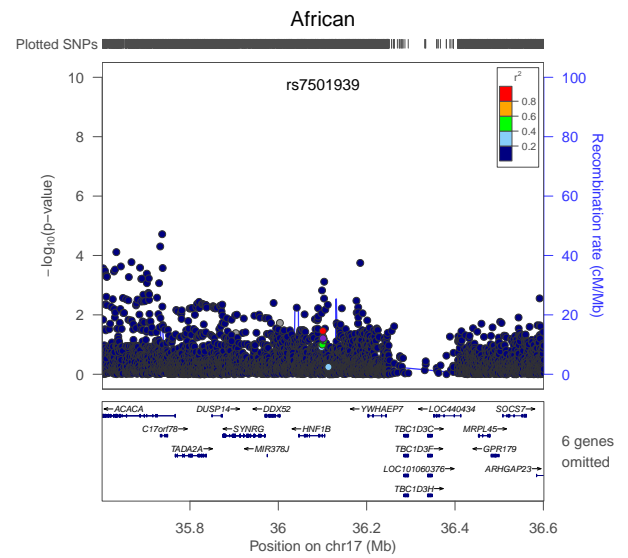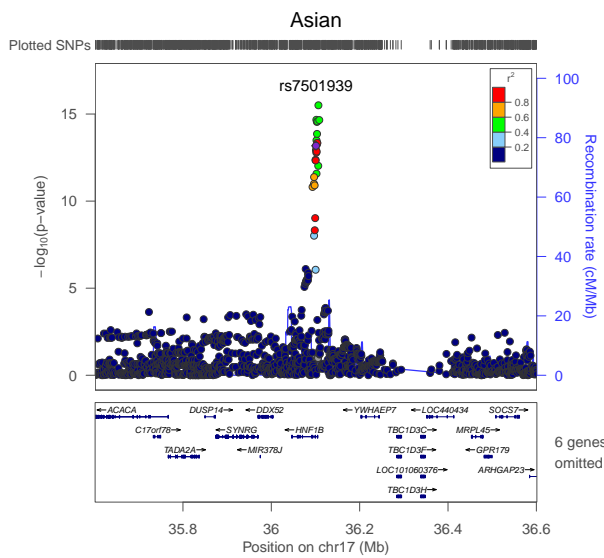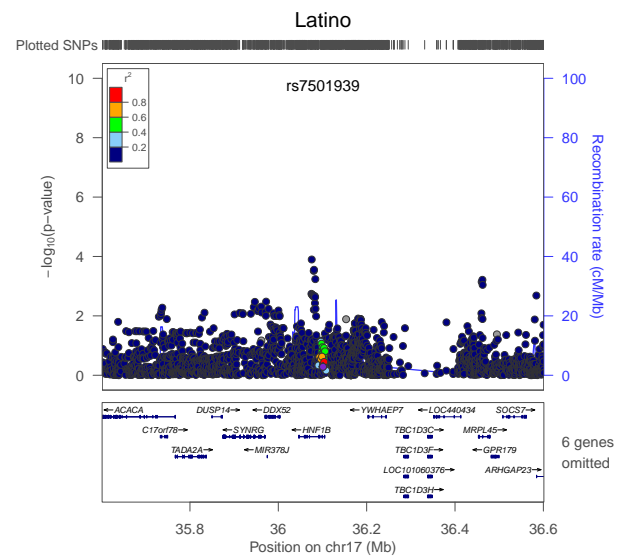

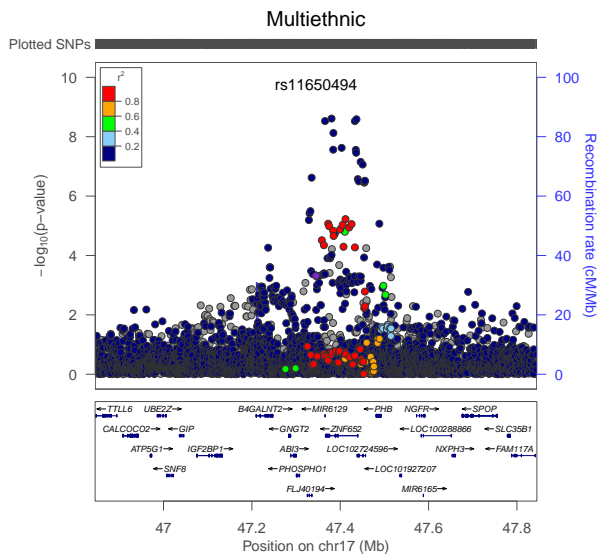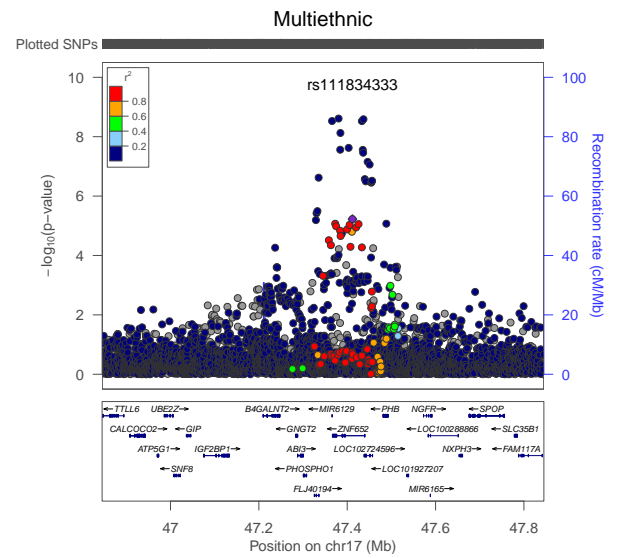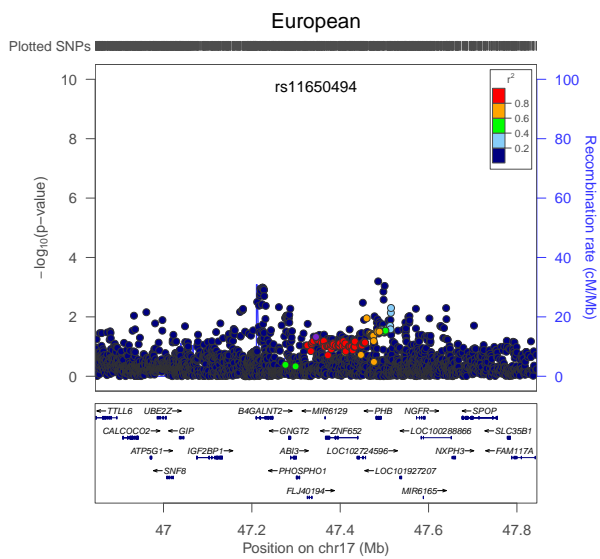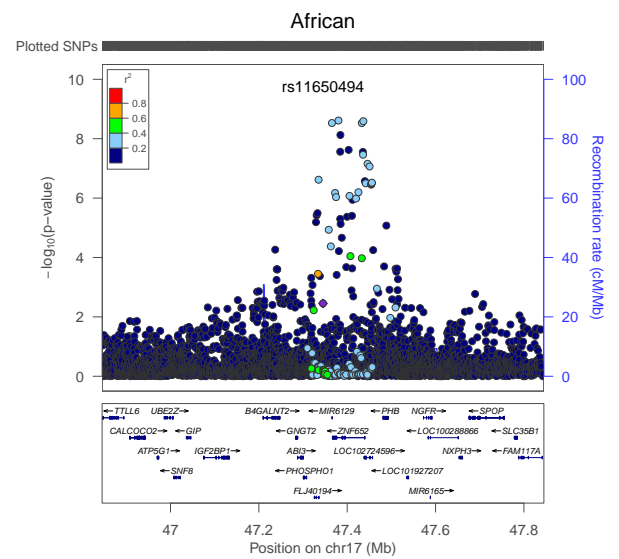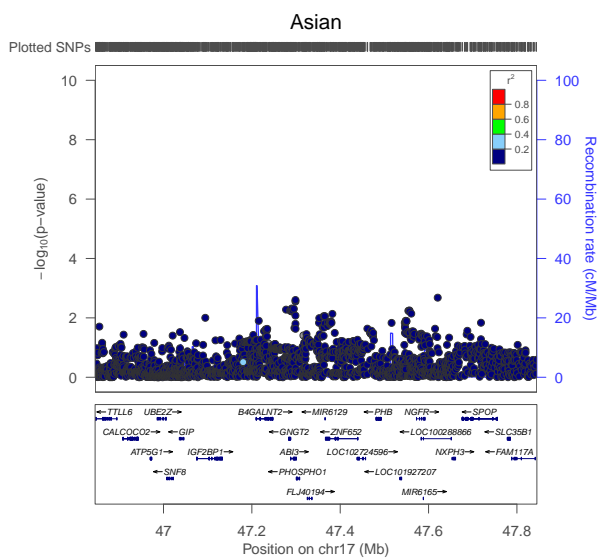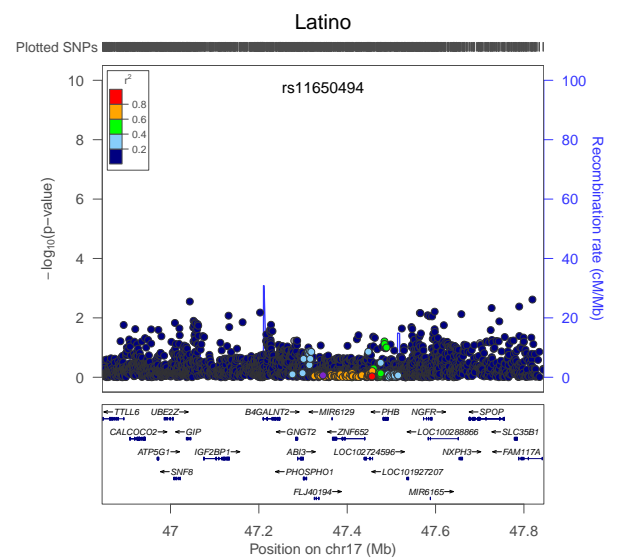

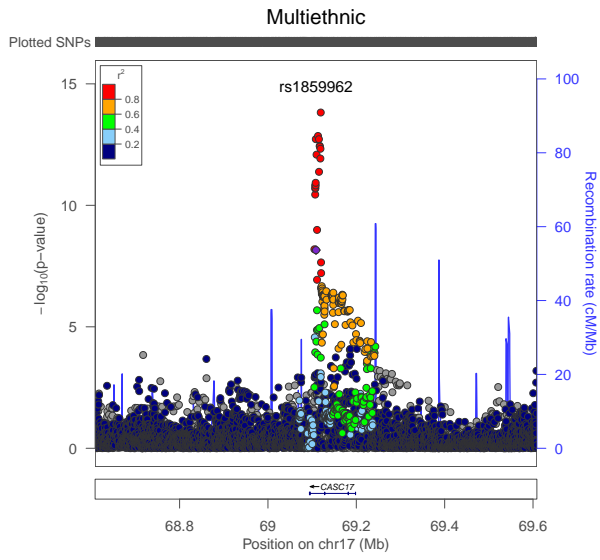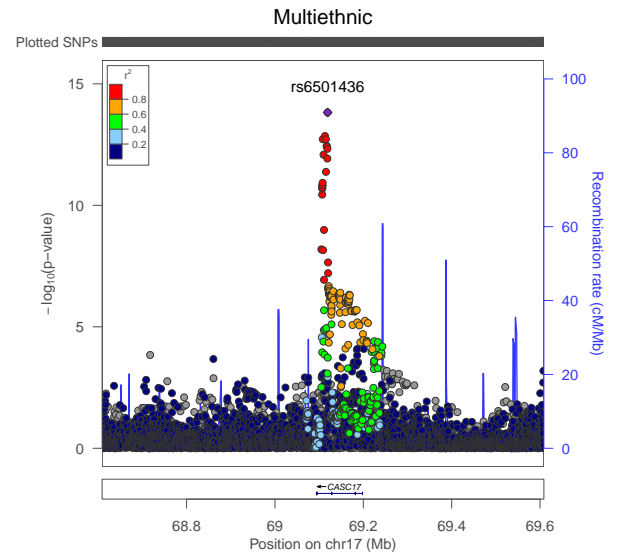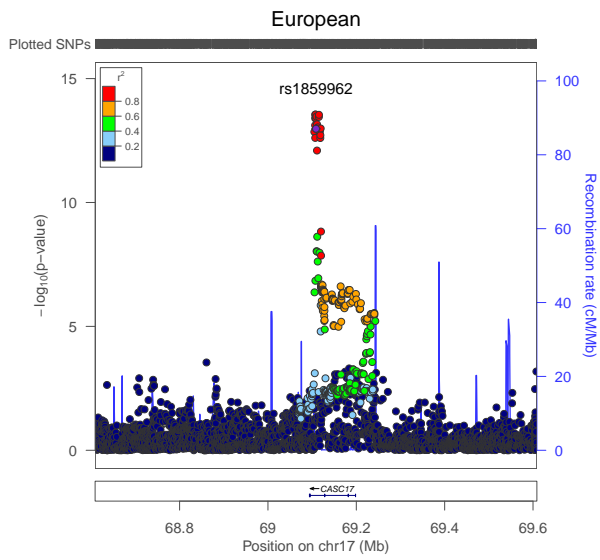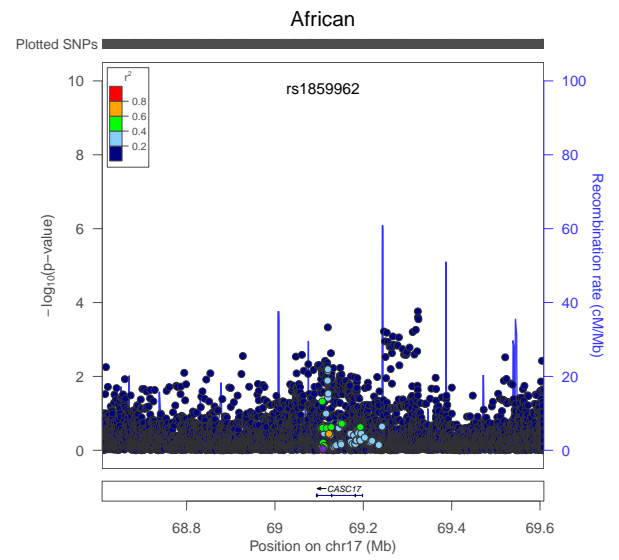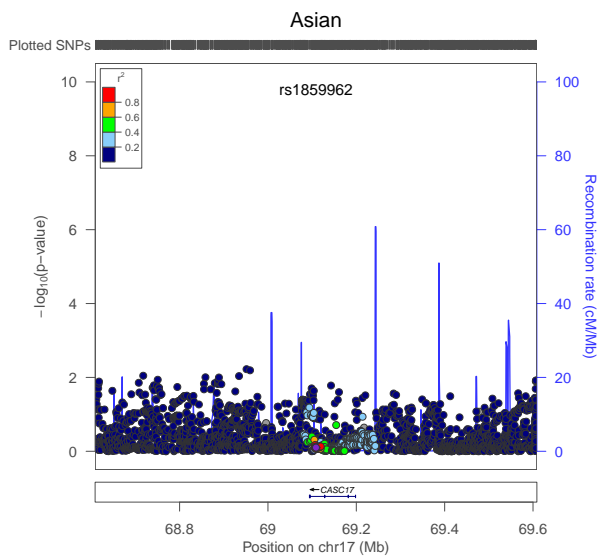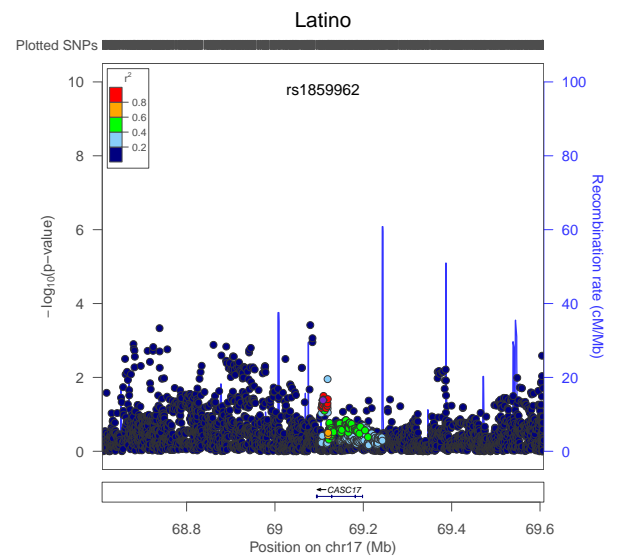

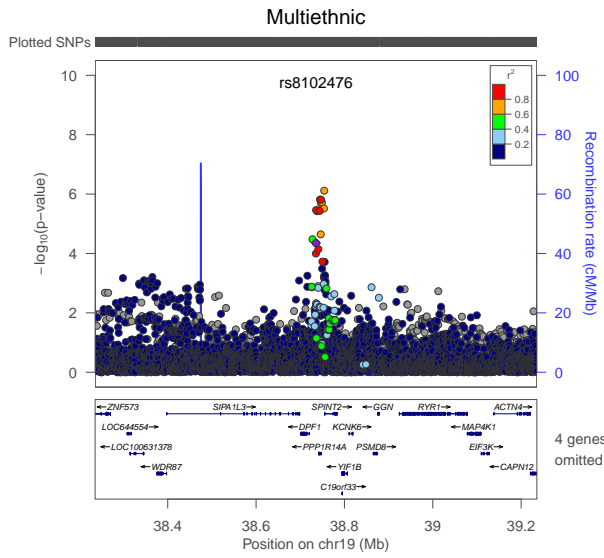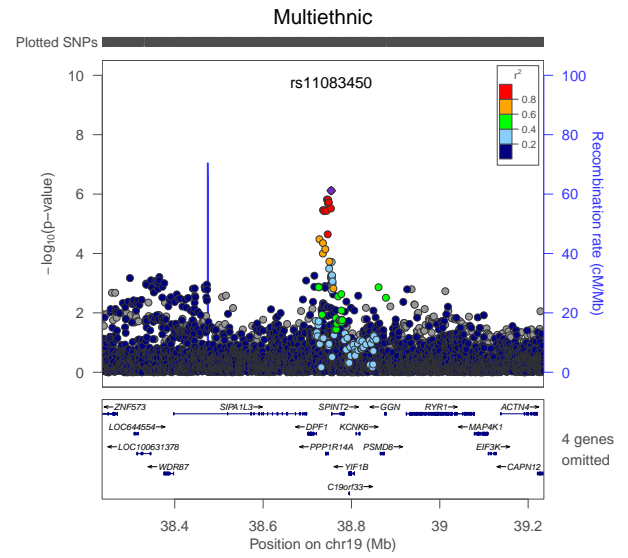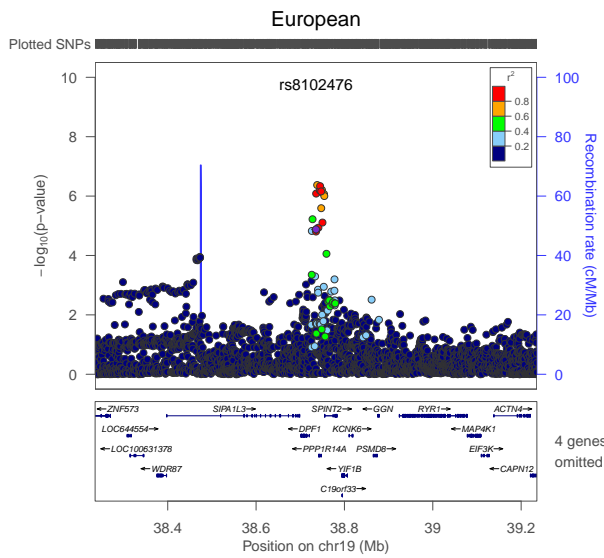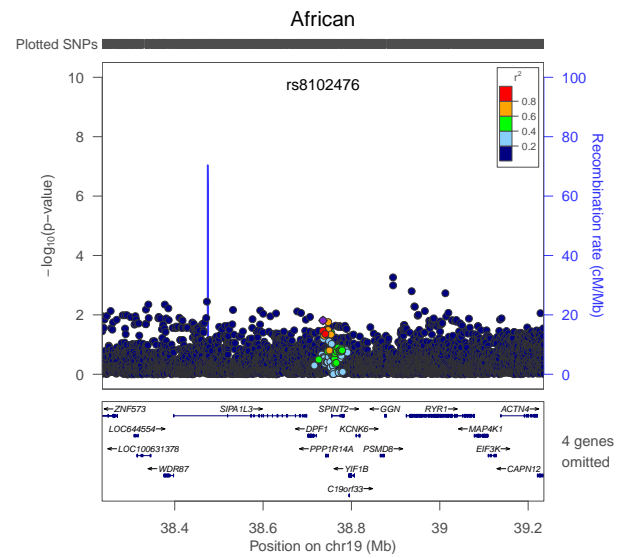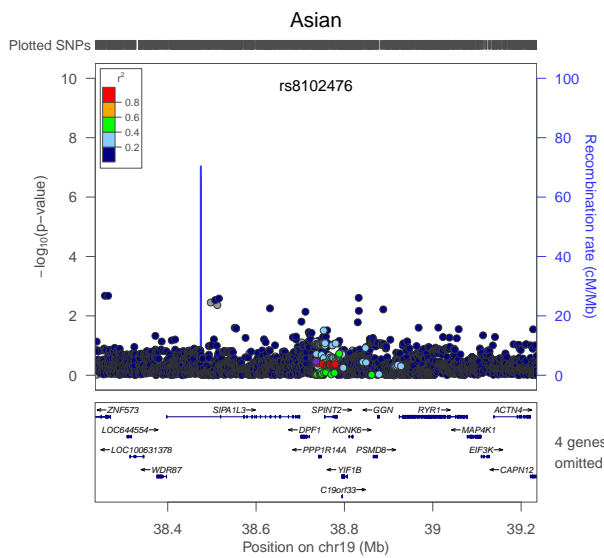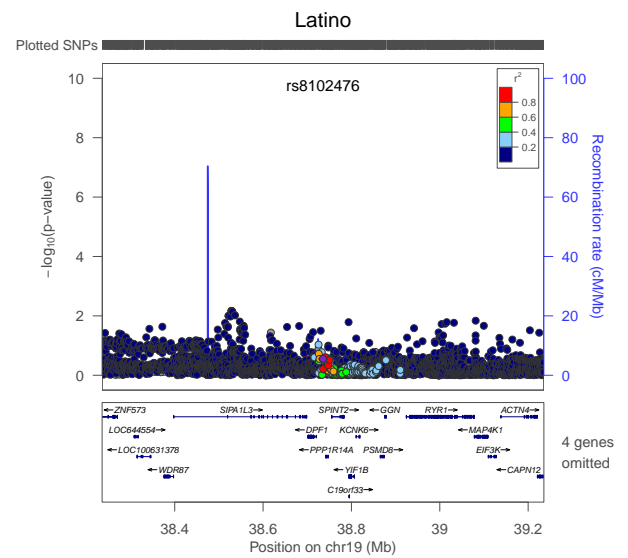

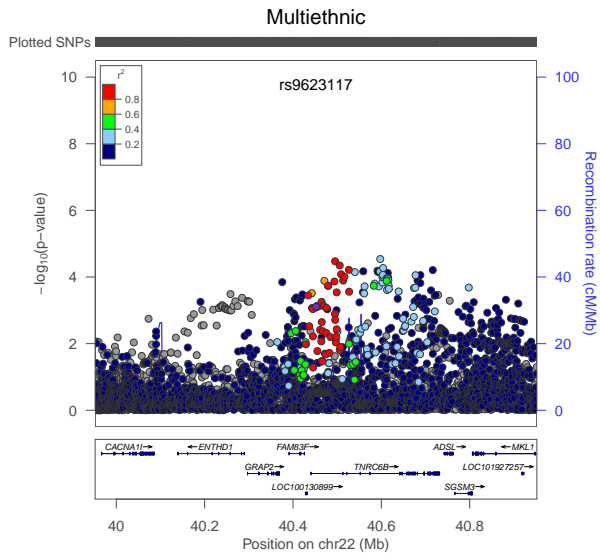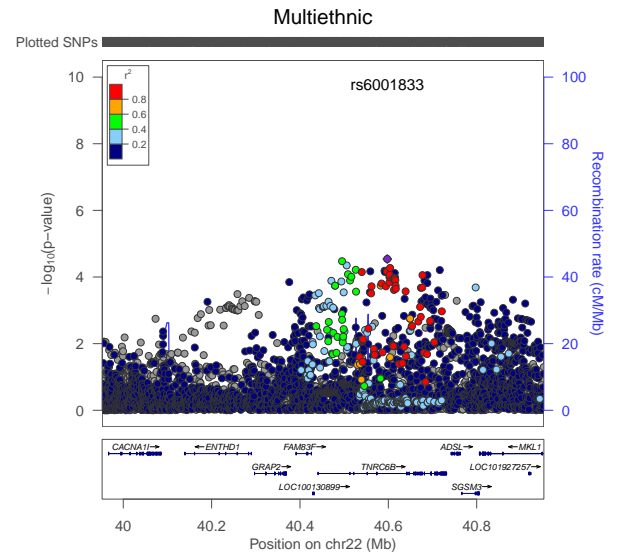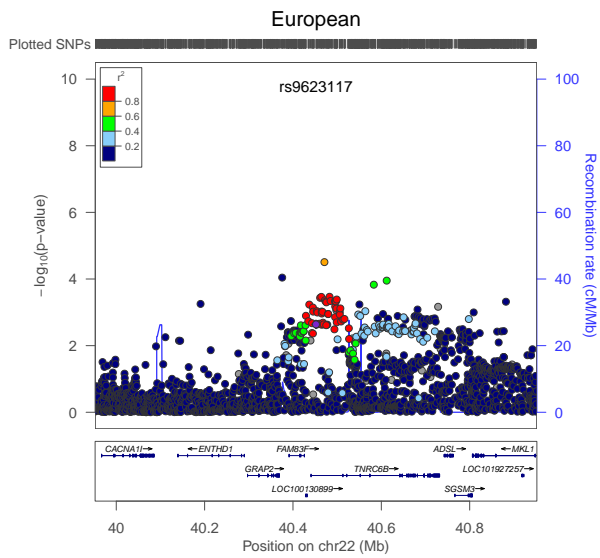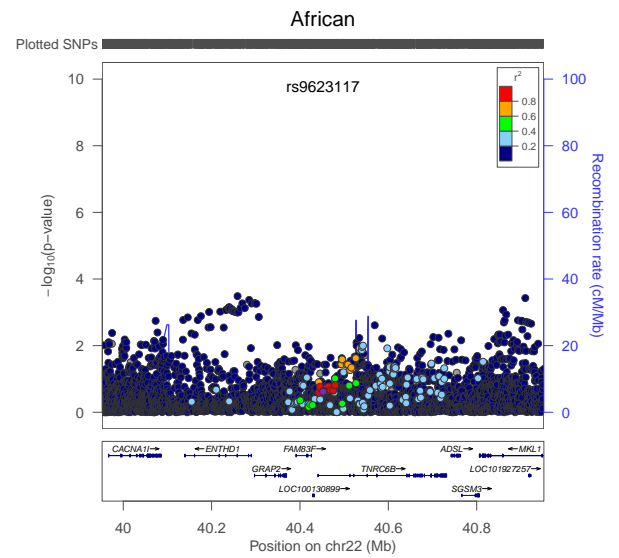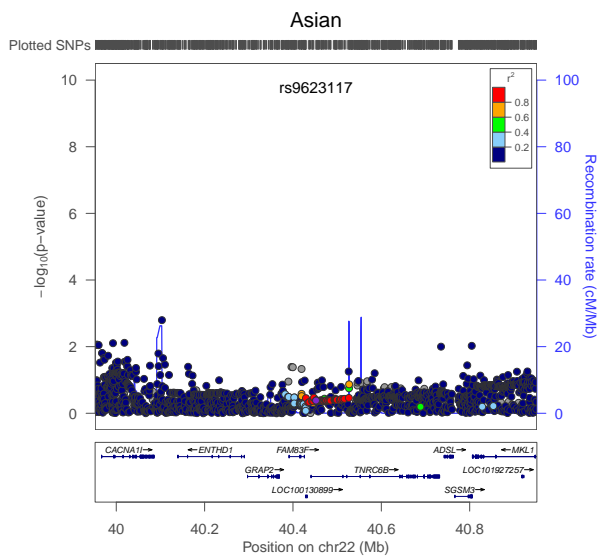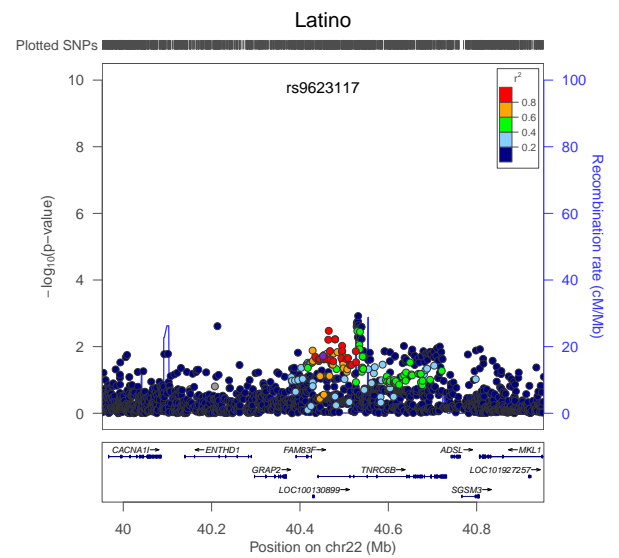

Supplement: supp_ddv269_ddv269supp_fig1.pdf [file supp_ddv269_ddv269supp_fig1.pdf]

# 3q21.3

Plotted SNPs

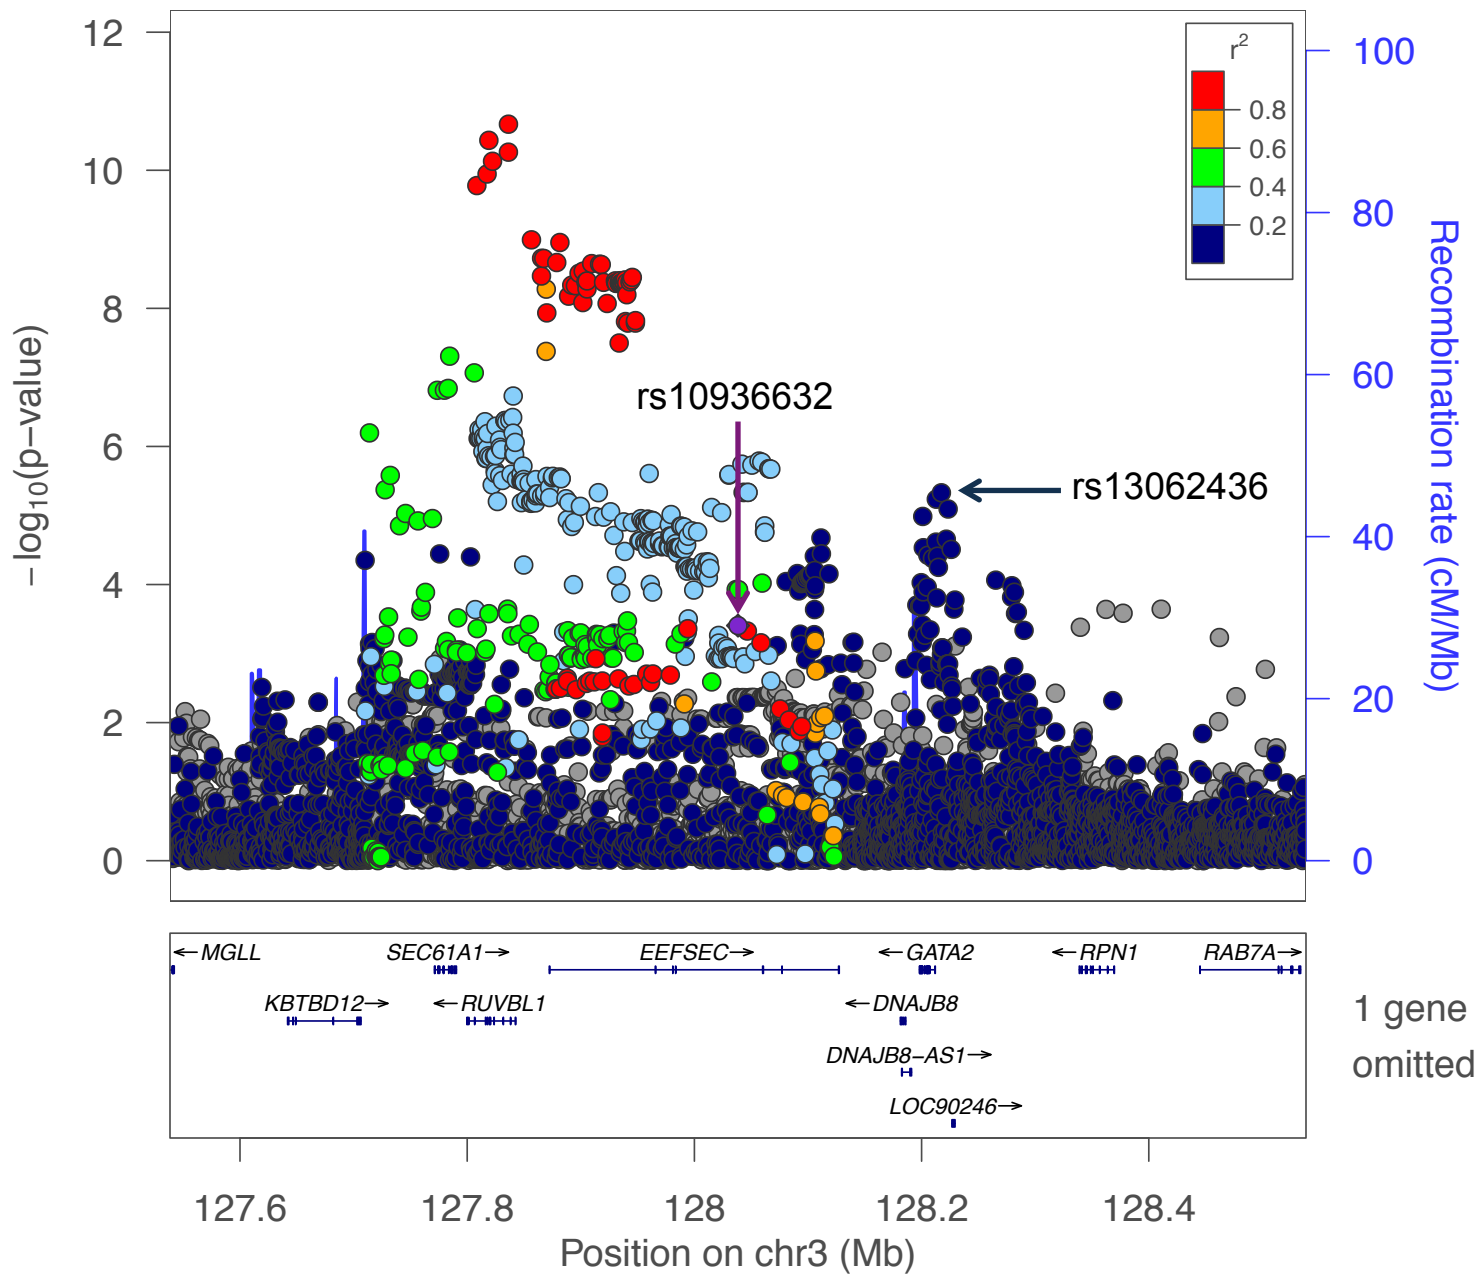

Supplement: supp_ddv269_ddv269supp_fig2.pdf [file supp_ddv269_ddv269supp_fig2.pdf]

# 3p12.1

Plotted SNPs

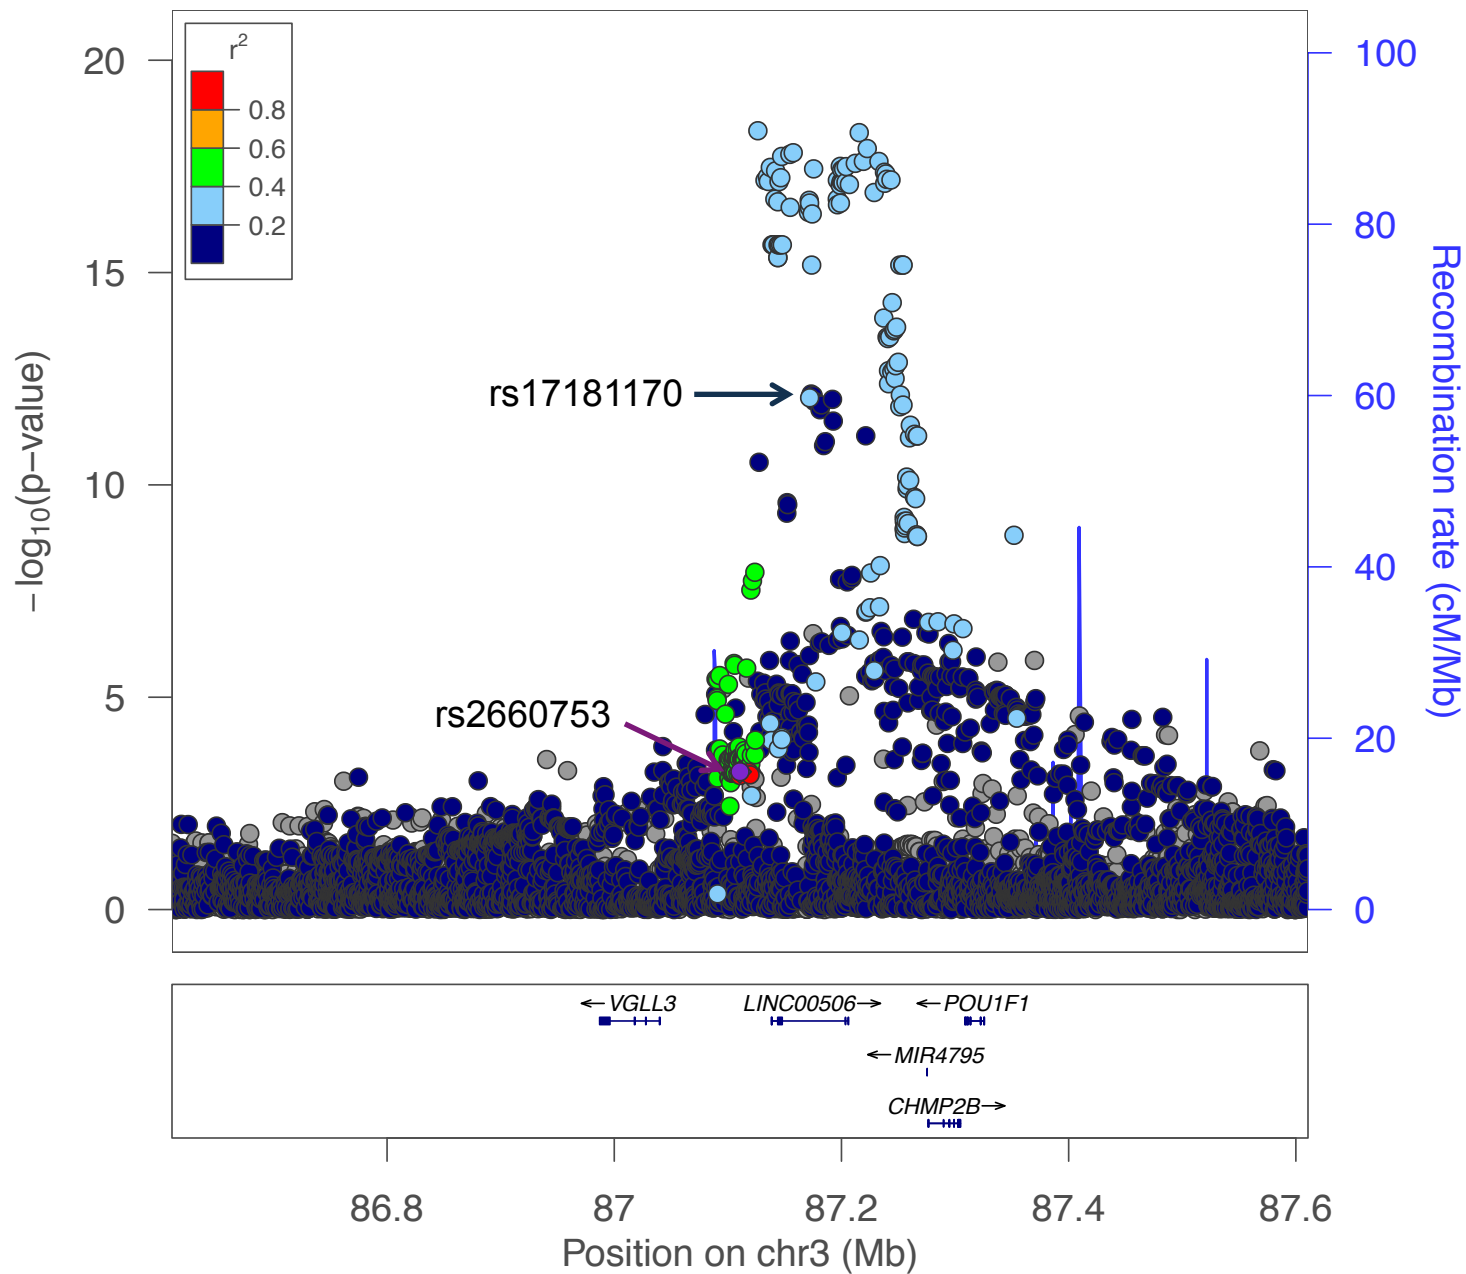

Supplement: supp_ddv269_ddv269supp_fig3.pdf [file supp_ddv269_ddv269supp_fig3.pdf]
